# Supplementary material for: Identification and Validation of a PD-L1 Binding Peptide for Determination of PDL1 Expression in Tumors
Source: PubMed Central journal article supplement (PMC5651871; doi:10.1038/s41598-017-10946-2), 2017-10-20
Supplement: 41598_2017_10946_MOESM1_ESM.pdf [file 41598_2017_10946_MOESM1_ESM.pdf]

# Supporting Figures: Identification and Validation of a PD-L1 Binding Peptide for Determination of PDL1 Expression in Tumors

Charles Caldwell Jr, Cory E. Johnson, V. N. Balaji, Govardhan A. Balaji, Richard D. Hammer & Raghuraman Kannan

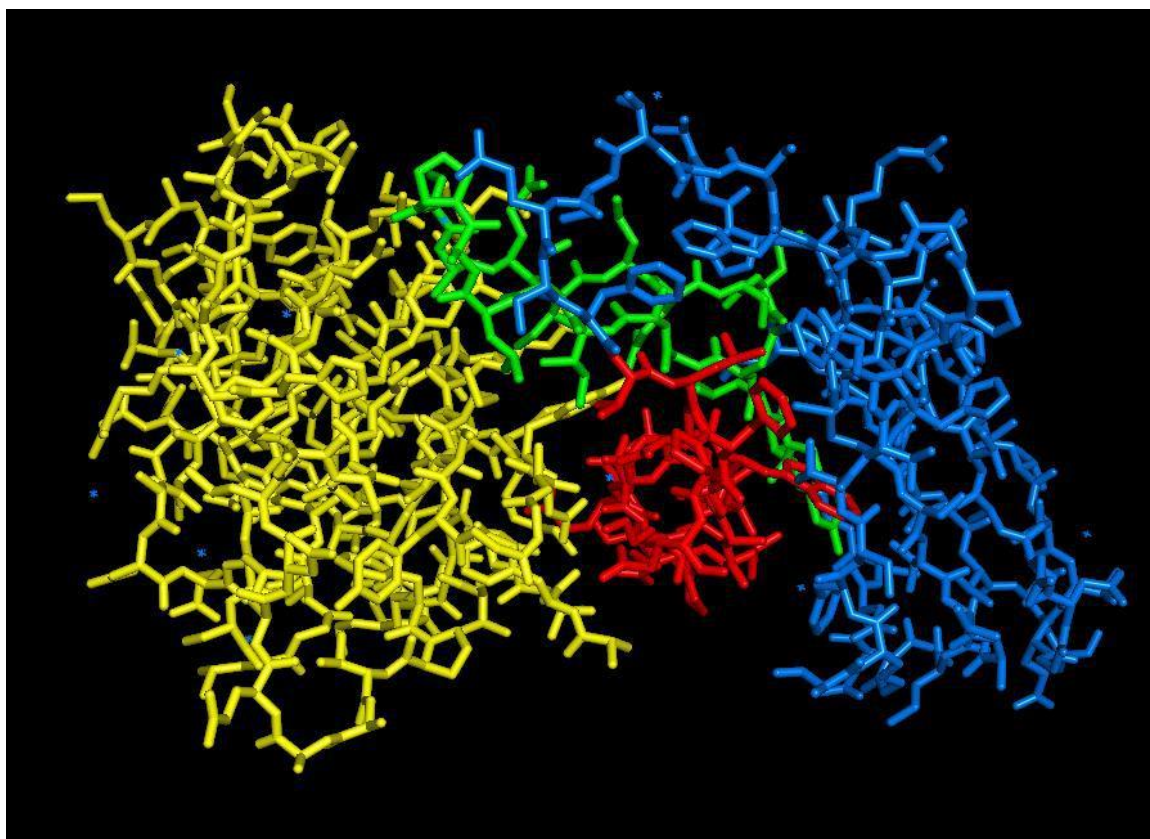

**Figure S1.** Identification of PD-L1 binding peptides. **Chain A** (PDL1) is shown in yellow. **Chain B** (PD1) is shown in blue, red and green. **Red and green** corresponds to the sequence 1 and 2 suggested for synthesis which are in contact with PDL1. These two sequences were selected based on the contact criteria and extension beyond the contact residues to include extended chains to retain its secondary structure.

# MDA-MB-231

Cytokeratin (FITC)

PD-L1 (Cy5)

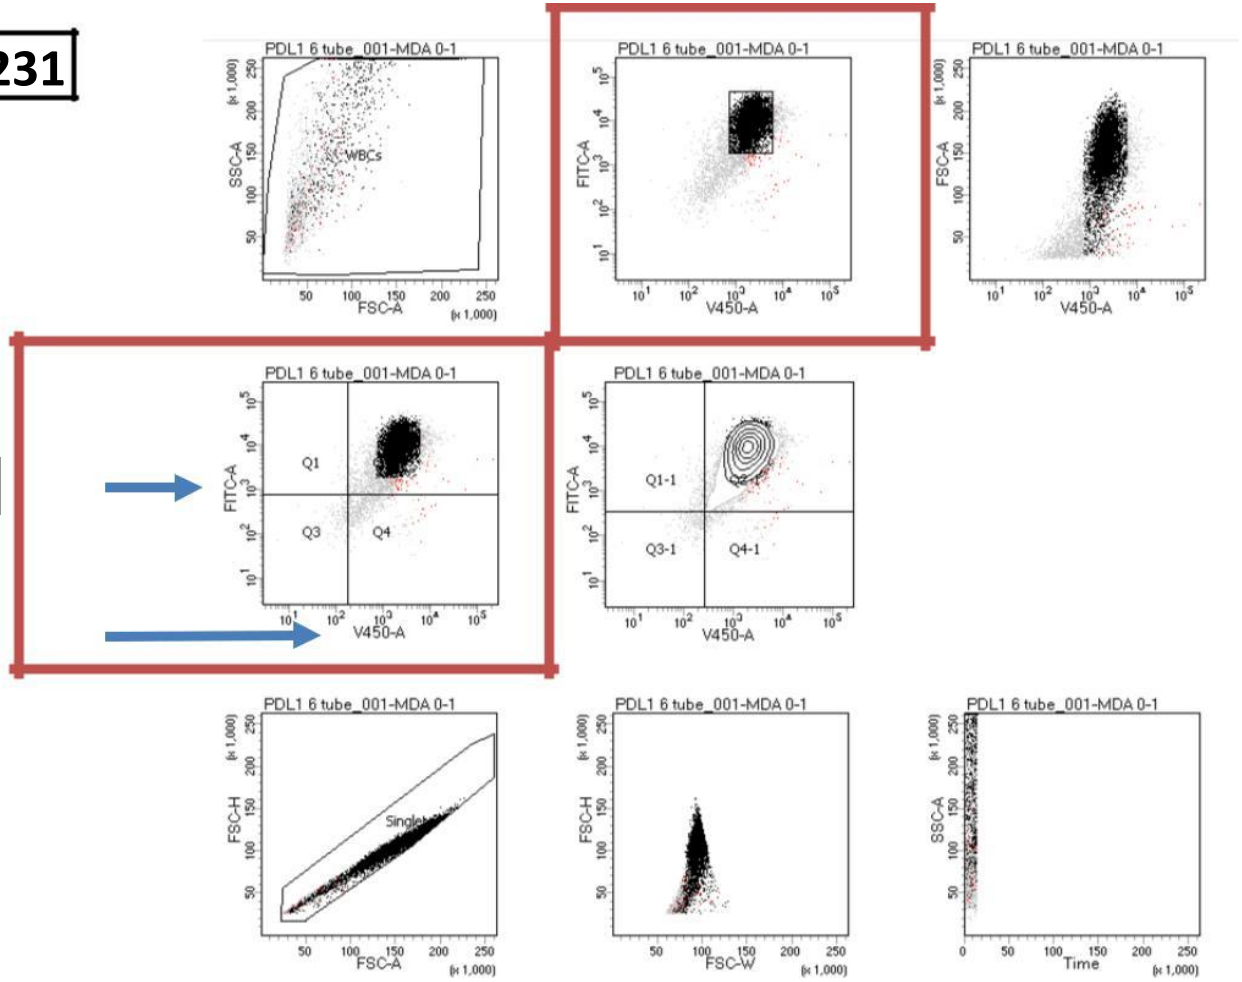

**Figure S2.** Flow Cytometry Method. Treated cell lines were double-gated for both cytokeranin (FITC) expression and PD-L1 expression (Cy5)

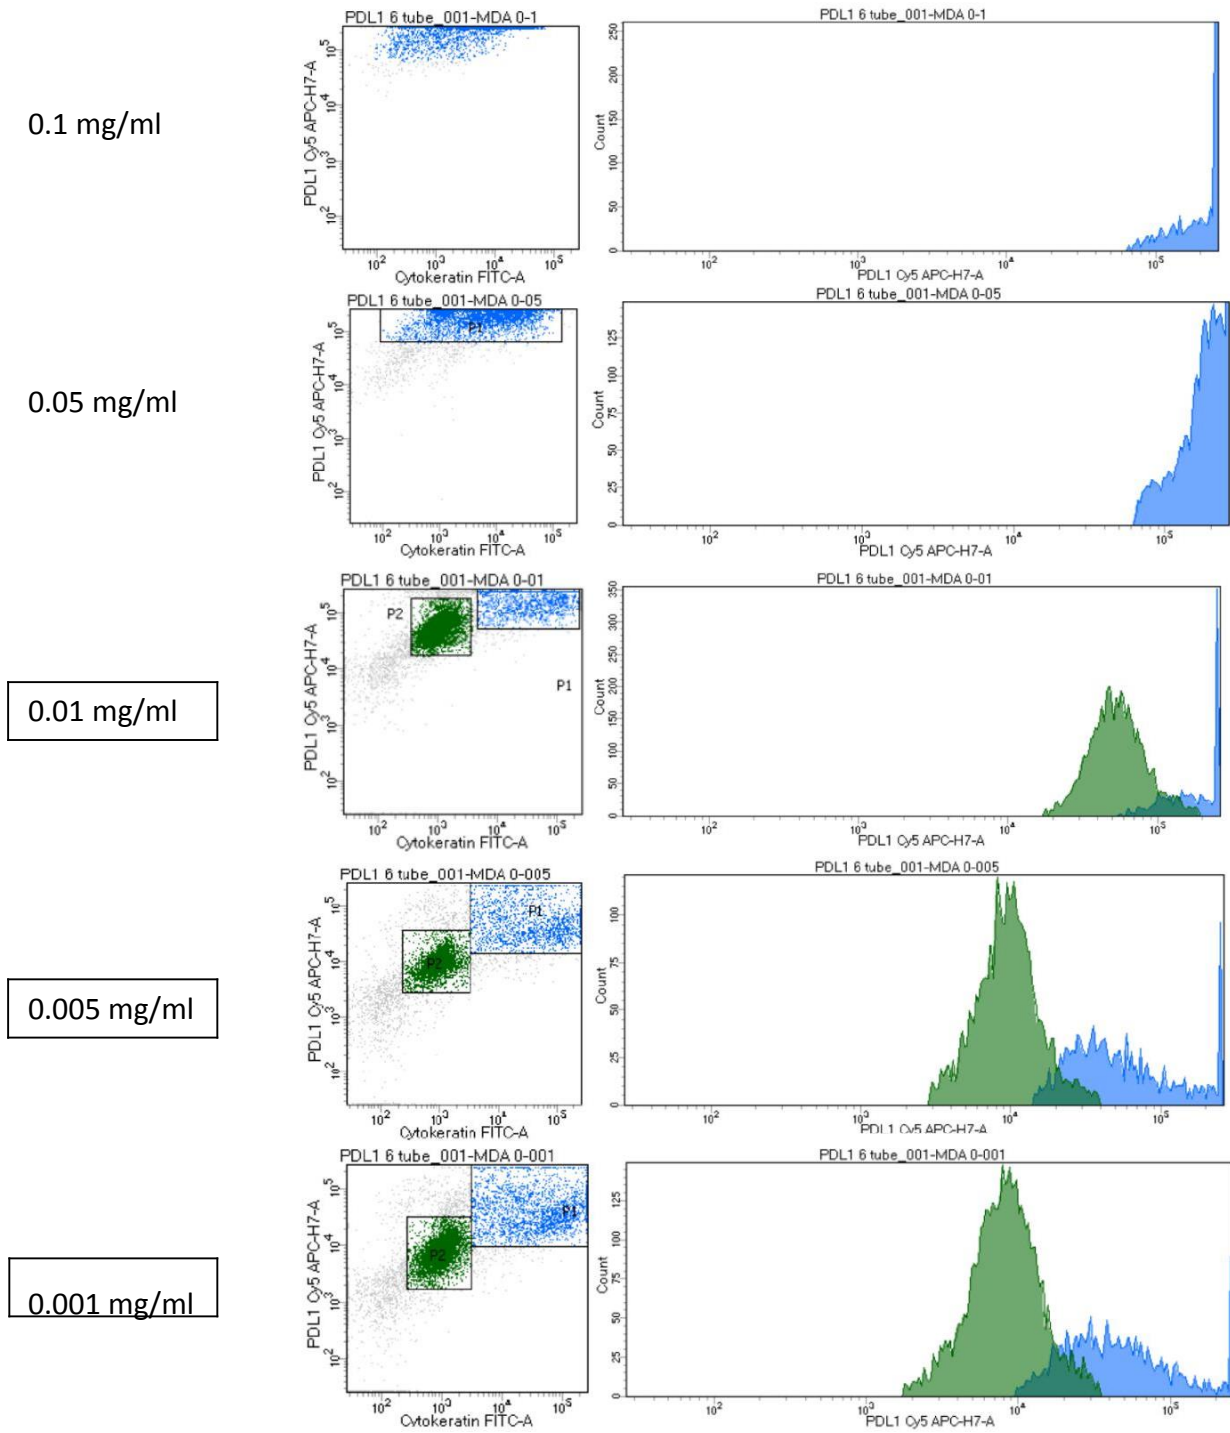

**Figure S3.** PD-L1 expressing MDA-MB-231 cell lines treated with titrations of PD-L1 peptide at the indicated concentrations



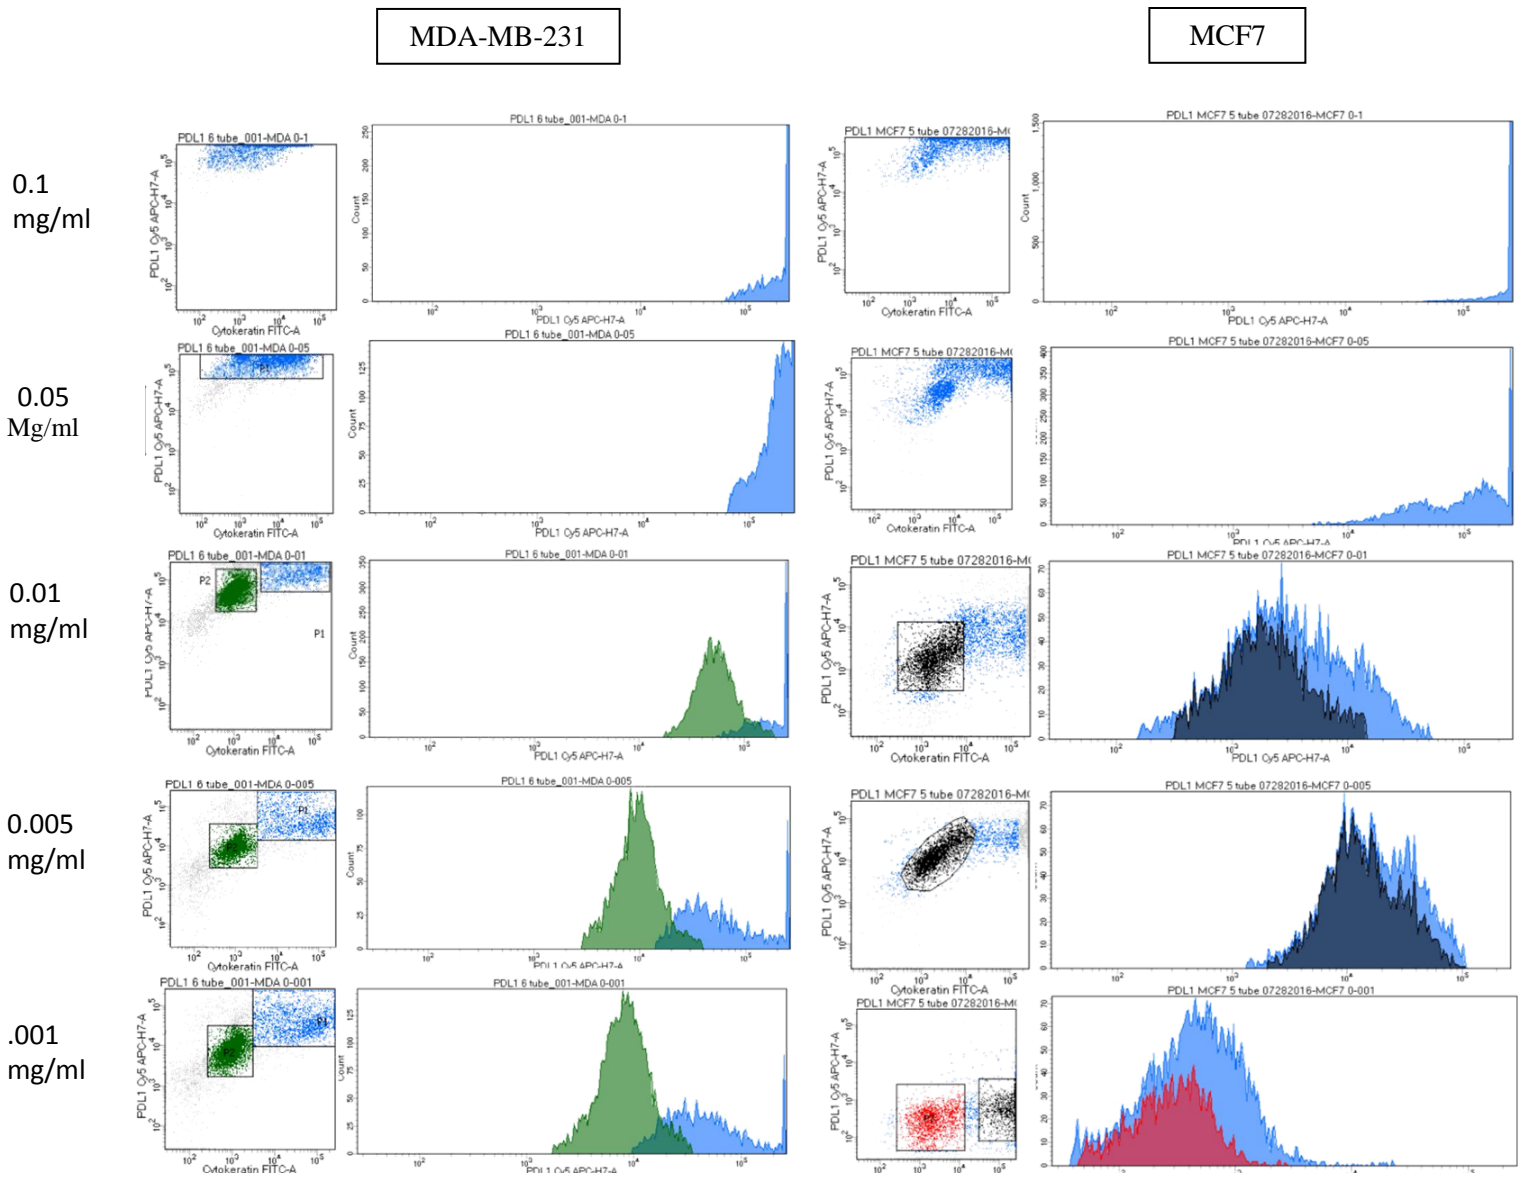

**Figure S4.** Titrations of PD-L1 peptide compared in PD-L1 high MDA-MB-231 and PD-L1 low MCF7. MCF7 treated at .005mg/ml had been treated twice with peptide.

**MDA-MB-231 (high PD-L1)**

**Y79 (Low PD-L1)**

**0.1  
mg/ml**

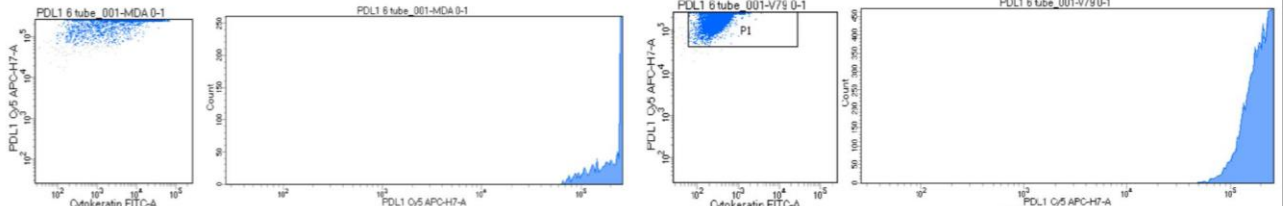

**0.05  
mg/ml**

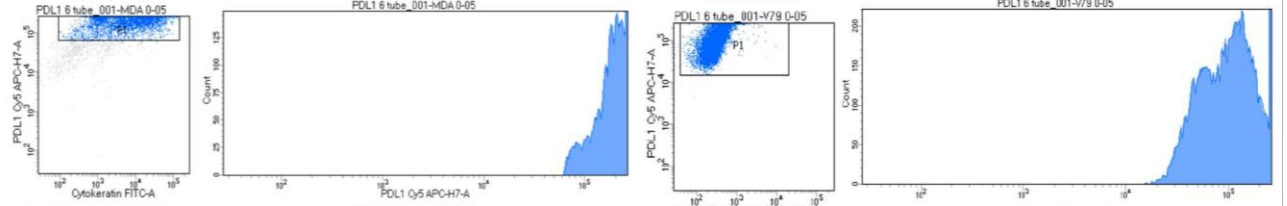

**0.01  
mg/ml**

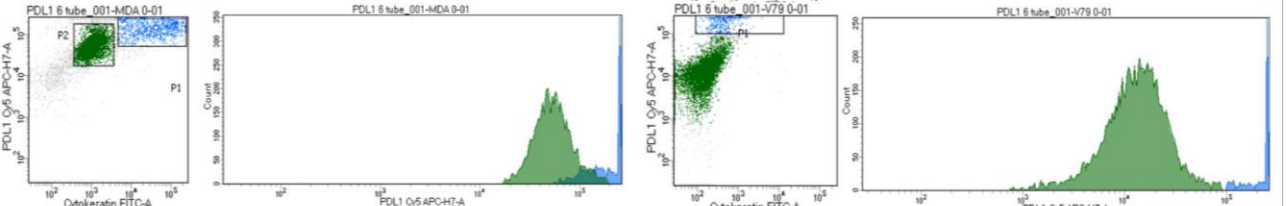

**0.005  
mg/ml**

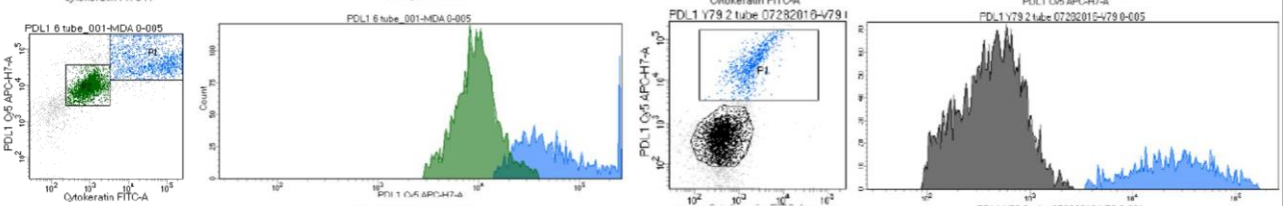

**0.001  
mg/ml**

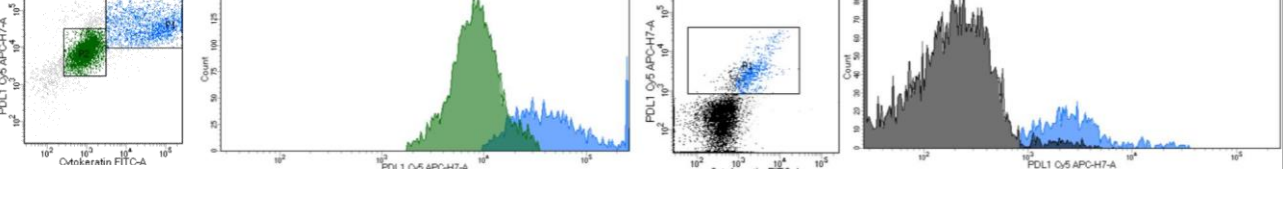

**Figure S5.** Titrations of PD-L1 peptide compared in PD-L1 high MDA-MB-231 and PD-L1 low Y79

## A549 (PDL1 Neg)

## HCC827 (PDL1 Pos)

RK-10-Cy5

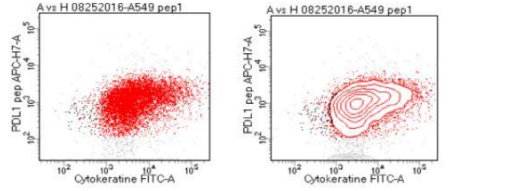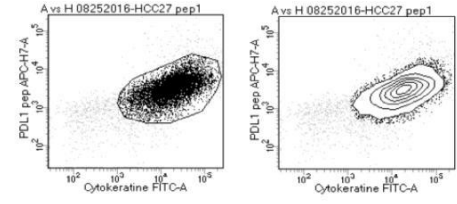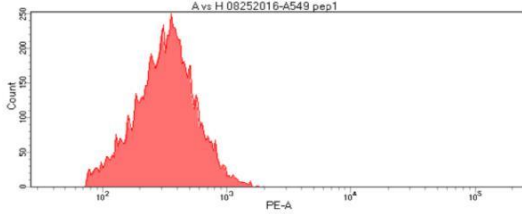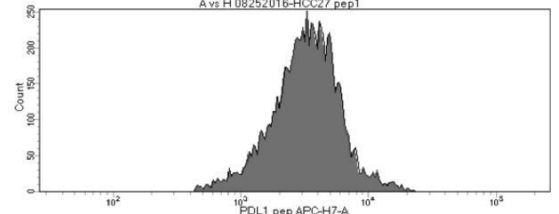

Experiment Name: A vs H emt 08252016  
 Specimen Name: A vs H 08252016  
 Tube Name: A549 pep1  
 Record Date: Aug 26, 2016 10:44:18 AM  
 \$OP: FLOW

| Population | #Events | %Parent | Median |
|------------|---------|---------|--------|
| P2         | 1,508   | 15.2    | 727    |
| P1         | 8,156   | 82.1    | 1,105  |

Experiment Name: A vs H emt 08252016  
 Specimen Name: A vs H 08252016  
 Tube Name: HCC27 pep1  
 Record Date: Aug 26, 2016 10:52:59 AM  
 \$OP: FLOW

| Population | #Events | %Parent | Median |
|------------|---------|---------|--------|
| P1         | 9,025   | 90.7    | 3,272  |

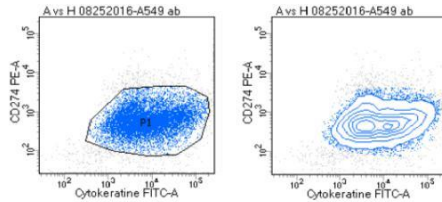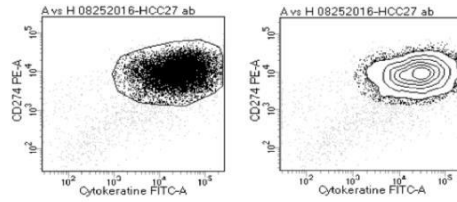

CD274 Antibody

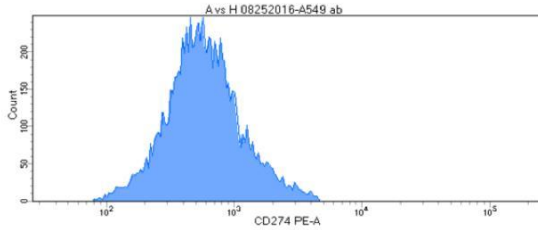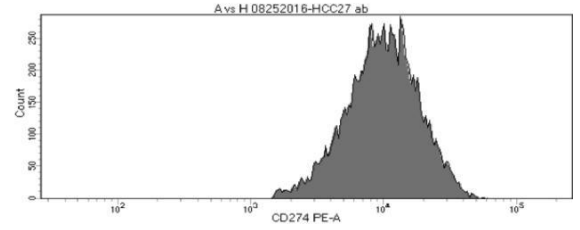

Experiment Name: A vs H emt 08252016  
 Specimen Name: A vs H 08252016  
 Tube Name: A549 ab  
 Record Date: Aug 26, 2016 10:47:33 AM  
 \$OP: FLOW

| Population | #Events | %Parent | Median |
|------------|---------|---------|--------|
| P1         | 9,822   | 92.2    | 27     |

Experiment Name: A vs H emt 08252016  
 Specimen Name: A vs H 08252016  
 Tube Name: HCC27 ab  
 Record Date: Aug 26, 2016 10:57:21 AM  
 \$OP: FLOW

| Population | #Events | %Parent | Median |
|------------|---------|---------|--------|
| P1         | 11,168  | 91.3    | 15     |

**Figure S6.** A549 and HCC827 cell lines were treated with RK-10-Cy5 peptide or CD274-PE antibody and analyzed for PD-L1 expression using Flow Cytometry

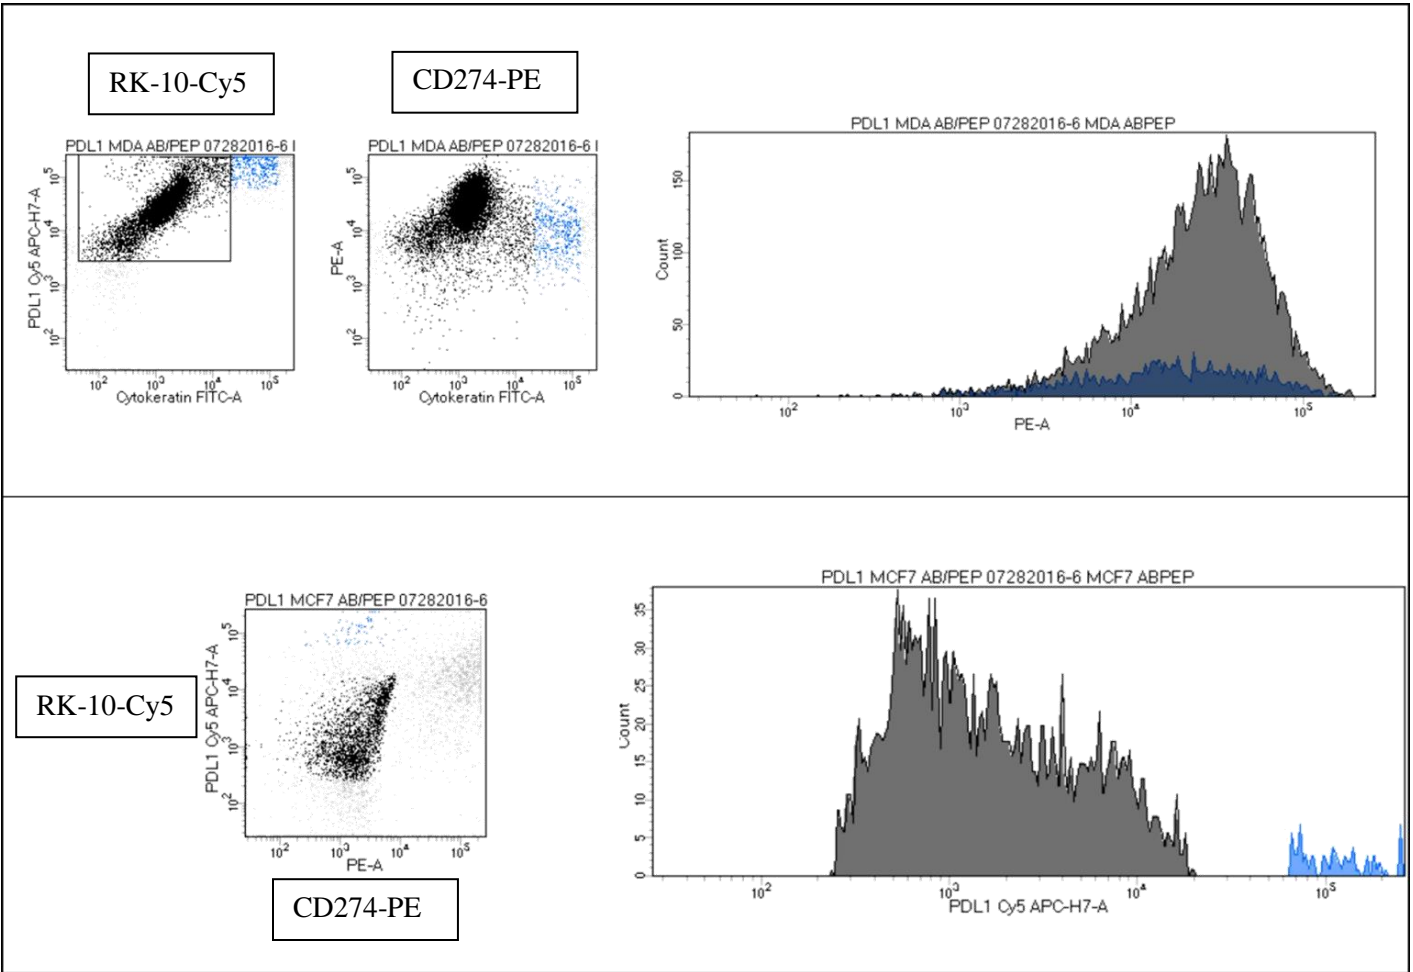

**Figure S7.** MDA-MB-231 cell line treated Simultaneously with RK-10-Cy5 and CD-274-PE antibody shows similar expression using both methods

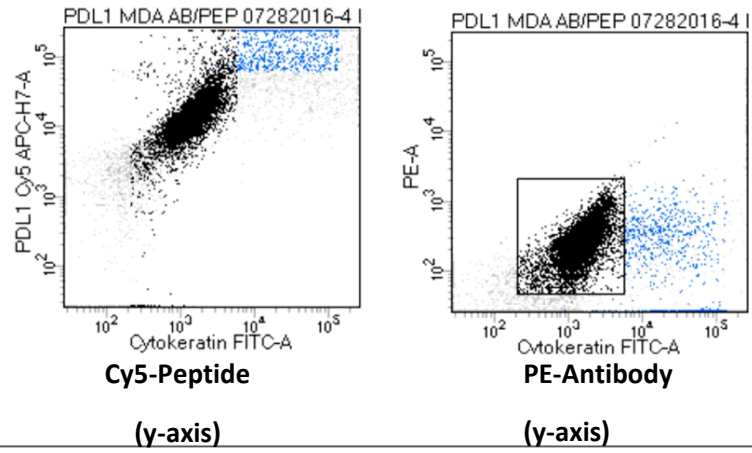

**Figure S8.** MDA-MB-231 cell line treated with RK-10-Cy5 for 1 hour, then treated with CD274-PE for 30 minutes shows decrease in CD274-PE expression.

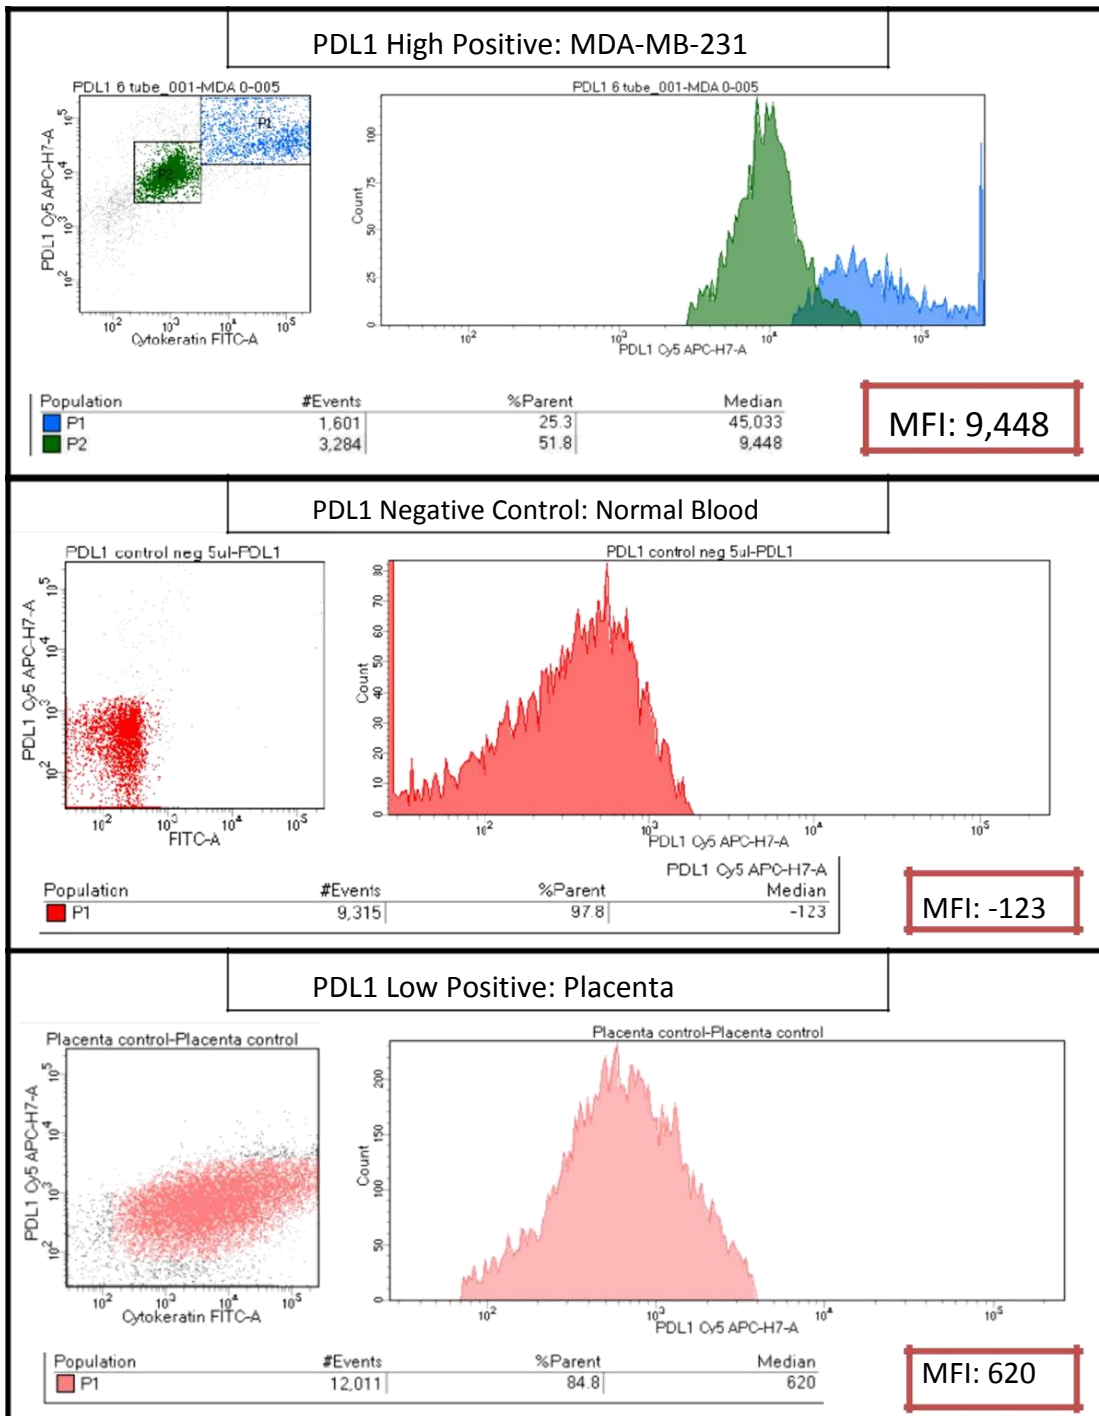

**Figure S9.** Established controls for PD-L1 expression using flow cytometry shows high and low Mean Fluorescent Intensity of PD-L1 expression

## Patient Tissue: Squamous Cell Carcinoma, 50 $\mu$ L Peptide (0.05mg/mL)

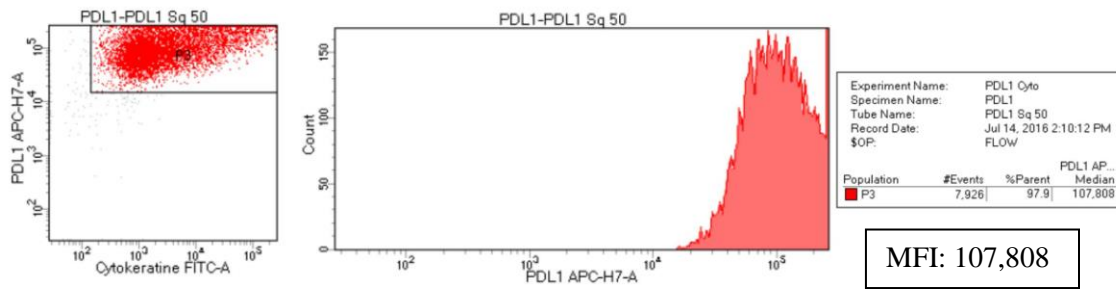

## Patient Tissue: Squamous Cell Carcinoma, 100 $\mu$ L Peptide (0.05mg/mL)

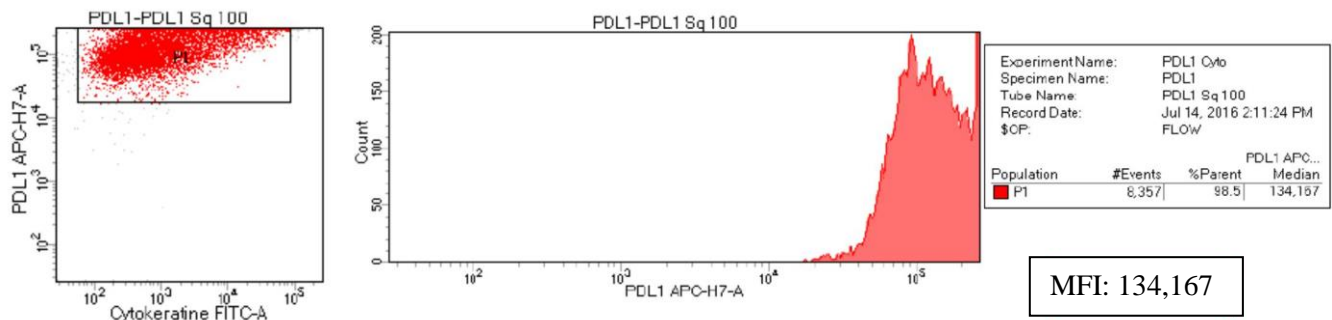

**Figure S10.** Squamous cell carcinoma patient tissue treated with increasing amounts of RK-10-Cy5 peptide shows high PD-L1 expression, with slight increase of fluorescent signal as amount of peptide added increases



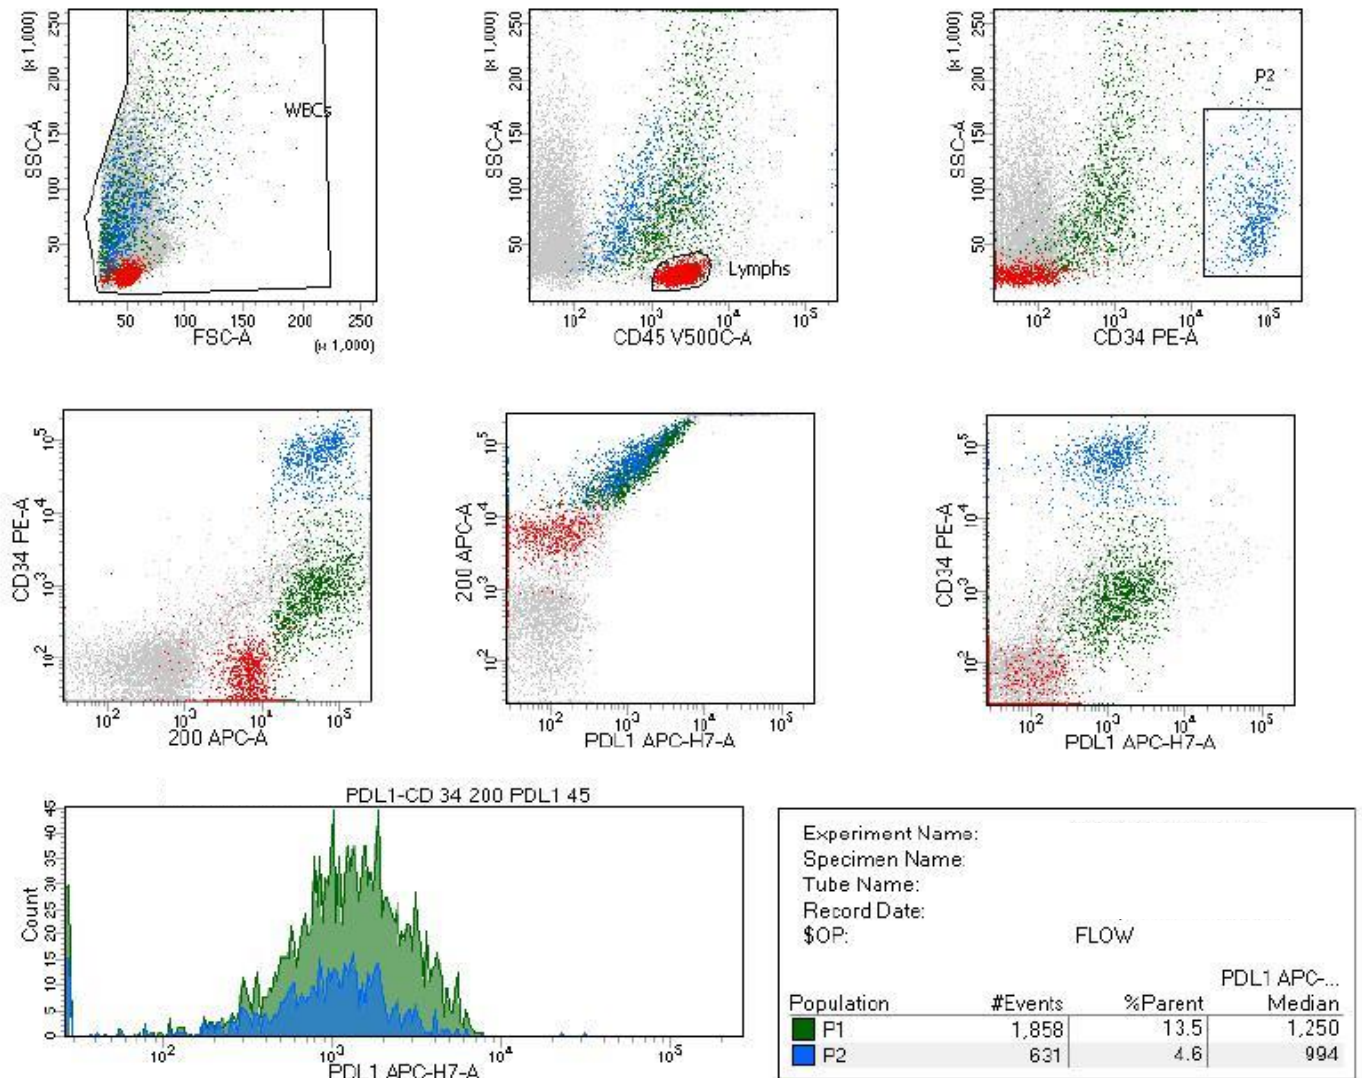

**Figure S11** Patient melanoma was identified with the unique phenotype of bright CD34, HLA-DR, moderated CD56 and negative CD45. **There was moderate PDL-1 using RK-10-Cy5** and no expression of cytokeratin by flow cytometry. The tissue biopsy showed metastatic melanoma, which was positive for A103 and Sox 10 and negative for cytokeratin. The morphology, flow and phenotype were diagnostic of melanoma

10x Magnification

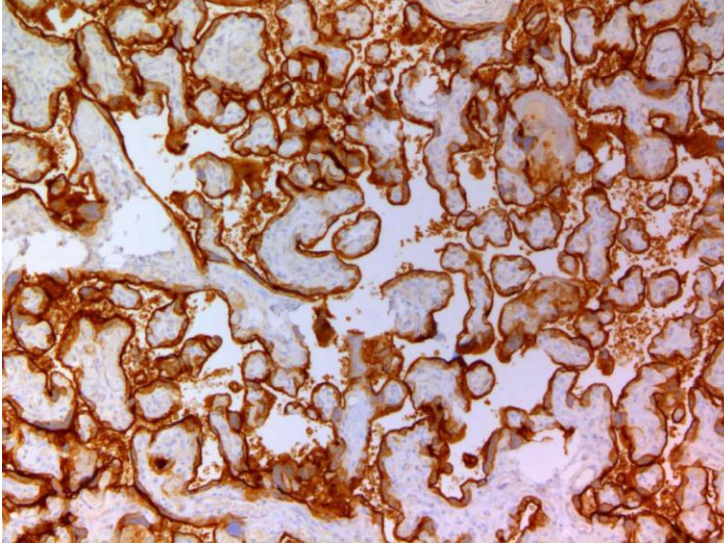

20x Magnification

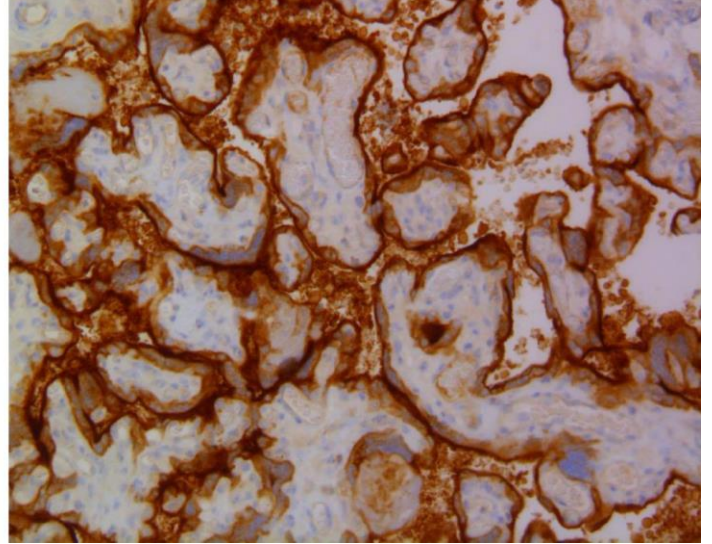

**Figure S12** Placenta tissue obtained from Mizzou tissue bank is used as our positive control tissue since trophoblast cells will express PDL1

15 $\mu$ M Concentration

10x Magnification

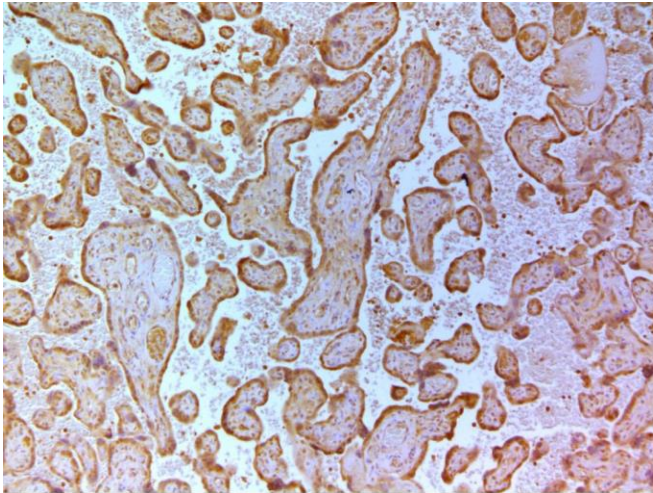

20x Magnification

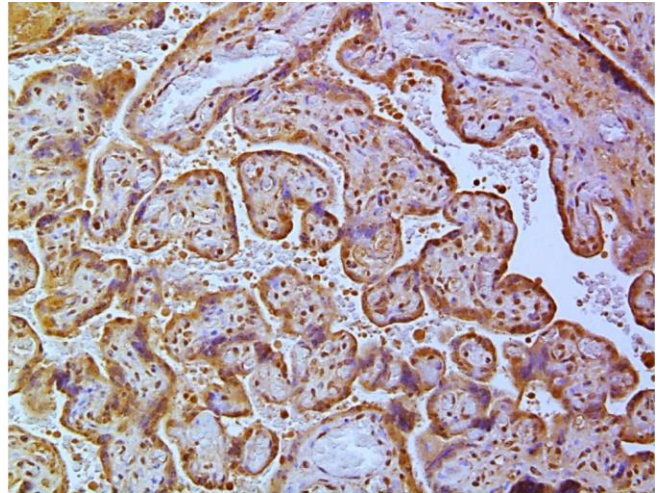

**Figure S13.** Placenta tissue treated with RK-10-Biotin shows specific staining of trophoblast cells.



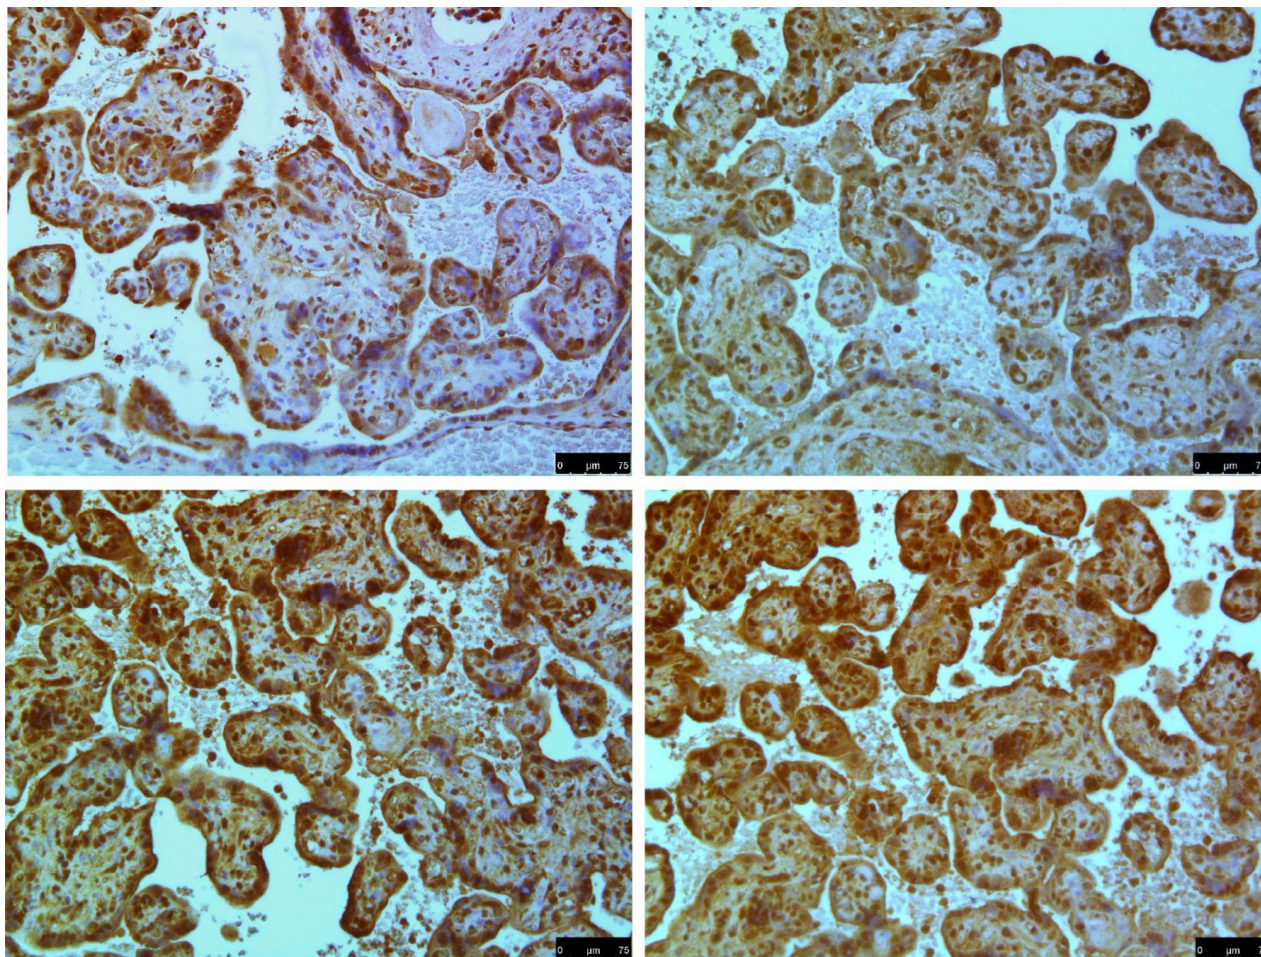

**Figure S14.** Placenta tissue stained with RK-10-Biotin is amplified using high-sensitivity Streptavidin-HRP

Mock Peptide

RK-10-Biotin

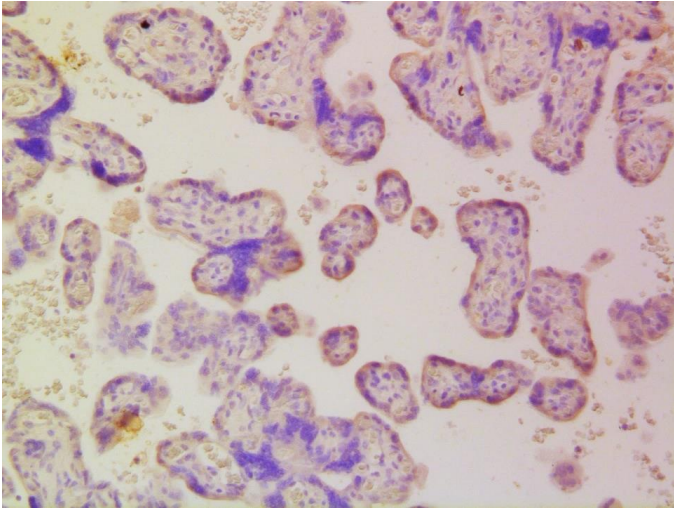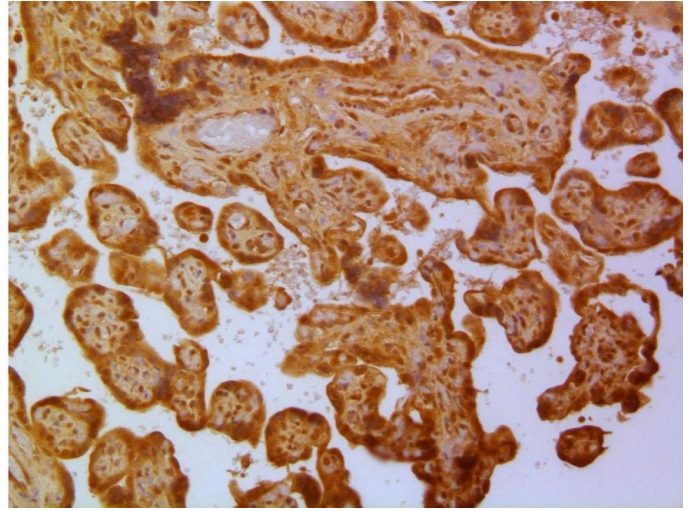

100µM Concentration

50µM Concentration

**Figure S15.** Mock peptide RK-11-Biotin was designed to have lower affinity than RK-10-biotin. Placenta tissues stained with both peptides are shown. Mock peptide RK-11 showed highly decreased specificity for placental trophoblasts compared to RK-10 peptide.



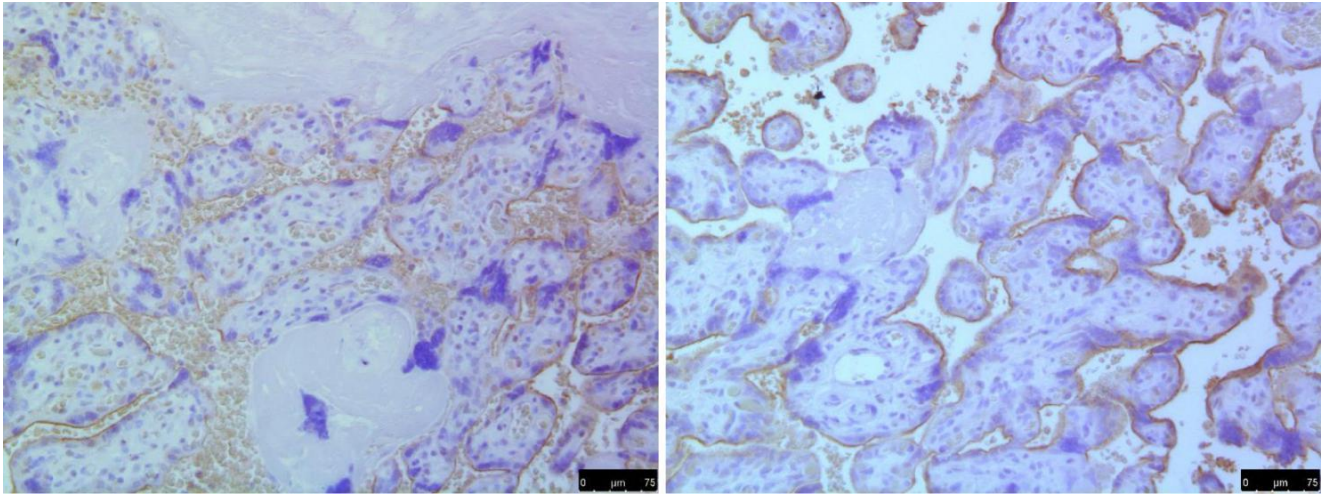

**Figure S16.** Placenta tissue was first blocked with 15 $\mu$ M peptide for 2h, washed, then put on the SP263 autostainer with the SP263 PDL-1 antibody IHC kit

**Patient A**

Blocked

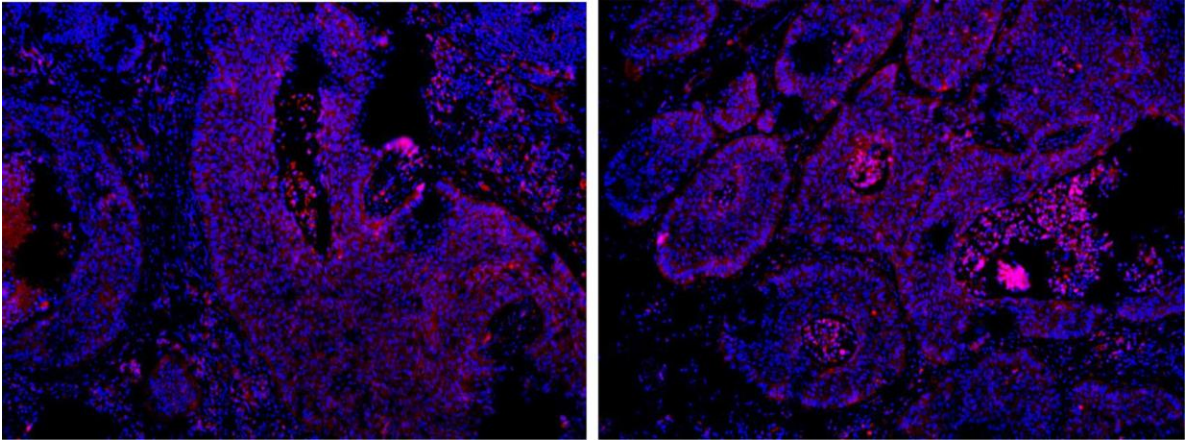

Not  
Blocked

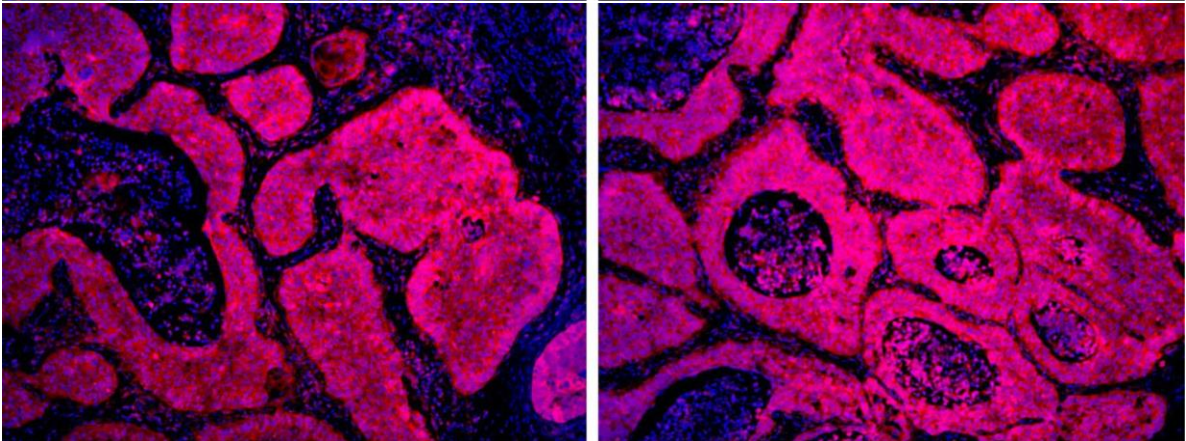

**Figure S17.** Images of patient tumor tissues Blocked and Not Blocked with RK-10 peptide are taken under the same illumination conditions. No adjustments were made – leading to an overexposed Cy5 channel in the ‘not blocked’ sample.



## Patient A

Blocked –  
Lower  
Sensitivity

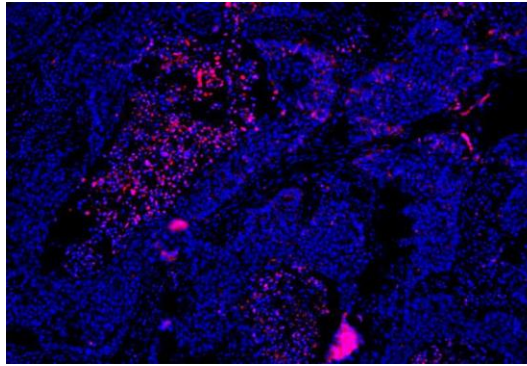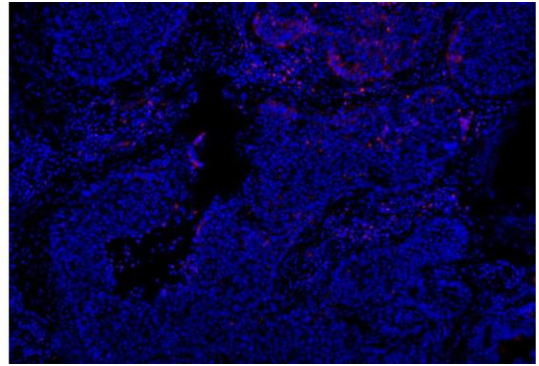

Not  
Blocked –  
Lower  
Sensitivity

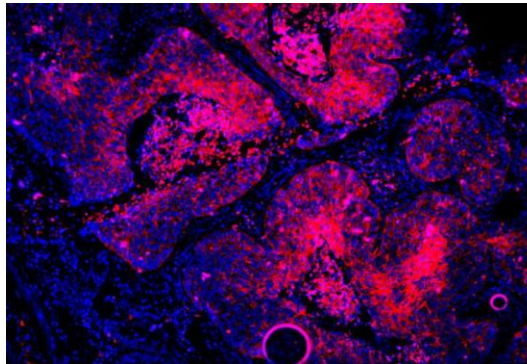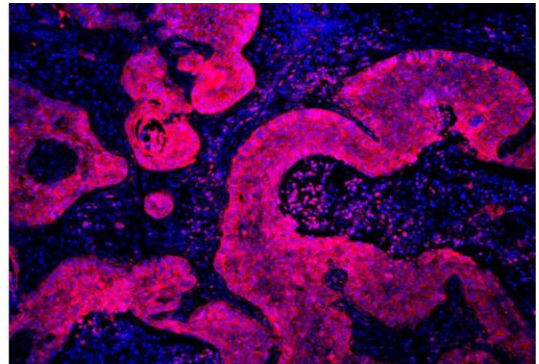

**Figure S18.** Cy5 Sensitivity was lowered until No Cy5 was seen in the Blocked Samples. The Unblocked samples still gave a strong Cy5 signal in the tumor. No illumination changes between the two samples were made.

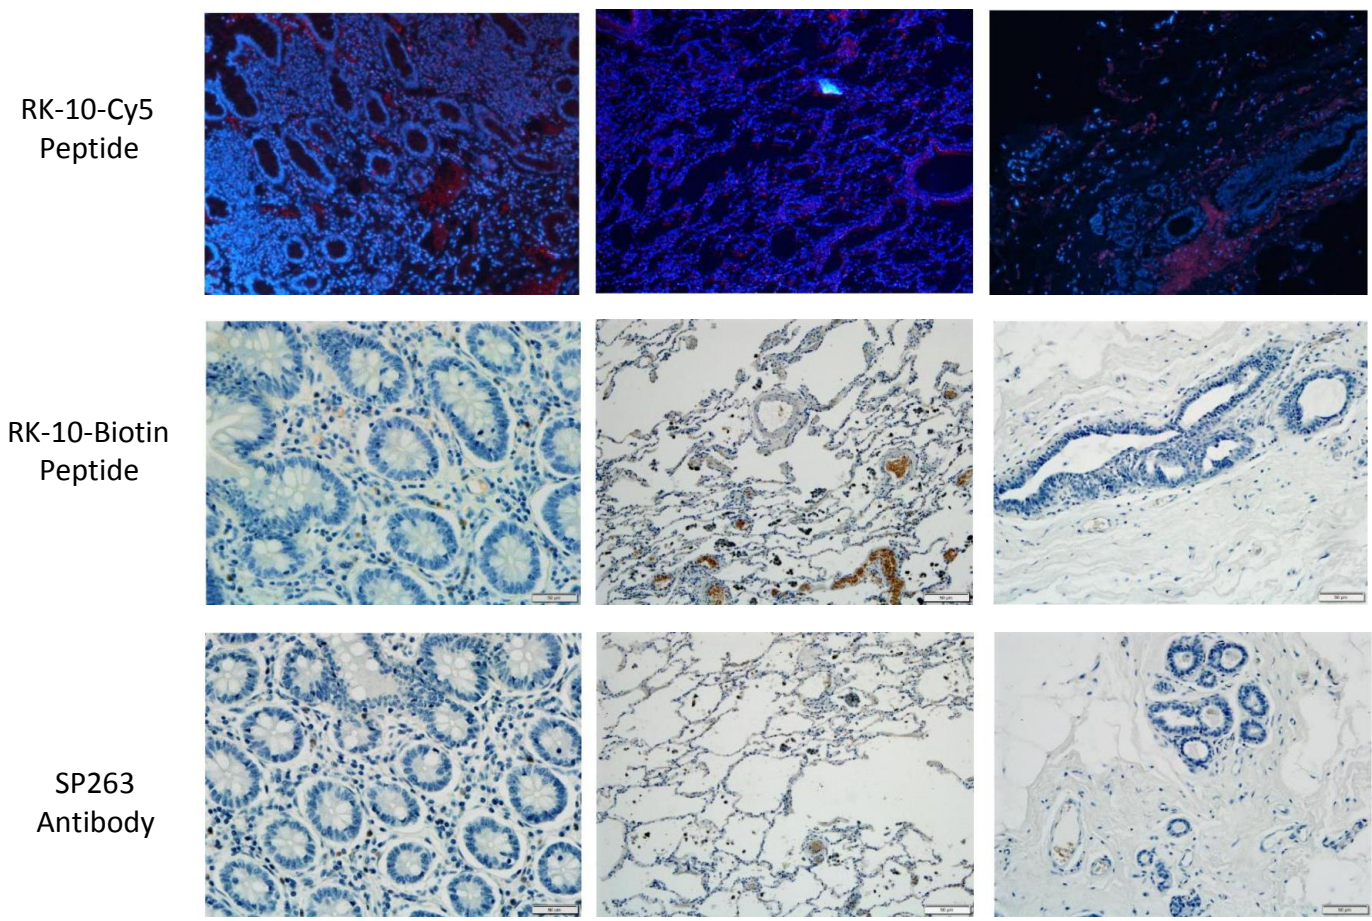

**Figure S19.** Normal Colon (left), Lung (center), and Breast tissues stained for PD-L1 expression using SP263 antibody or RK-10 peptide constructs



SP263

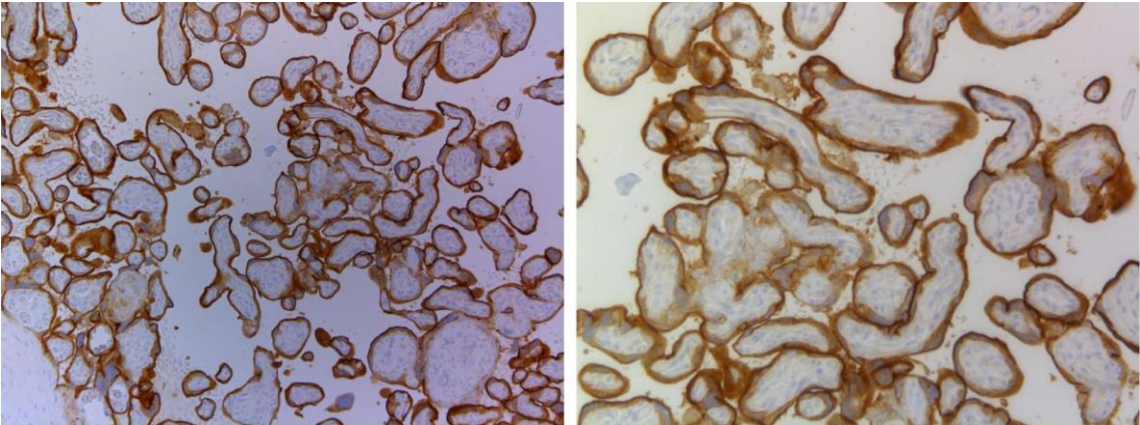

Cy5 Peptide

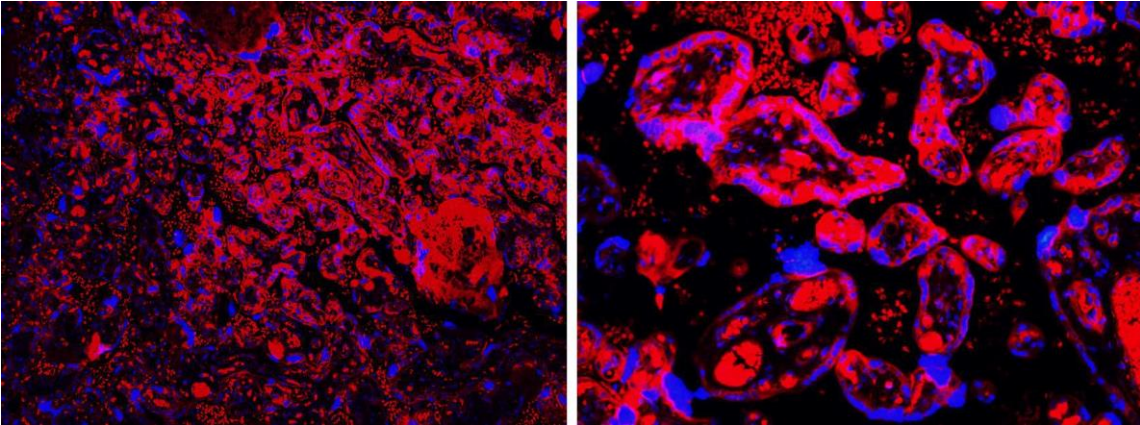

**S20.** High sensitivity observed with the Fluorescent Peptide staining in Placental control tissue using RK-10-Cy5



10X Magnification

20X Magnification

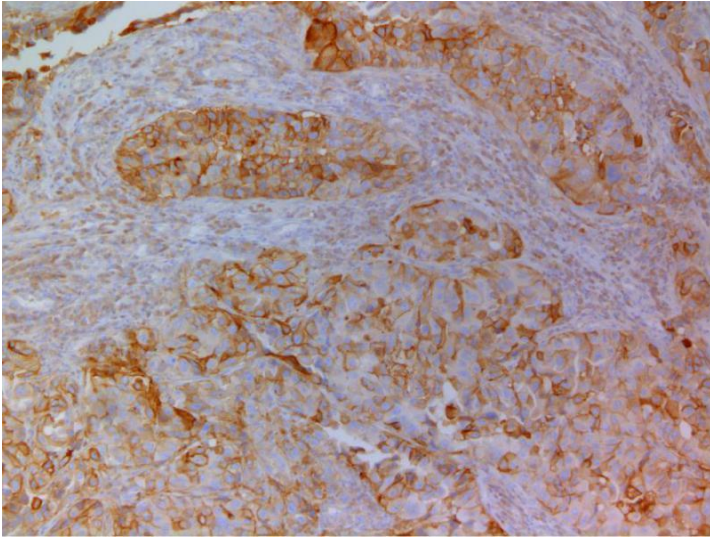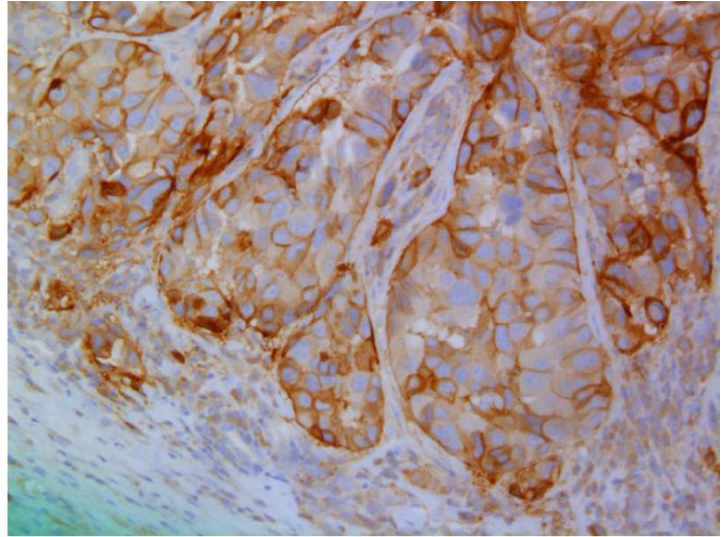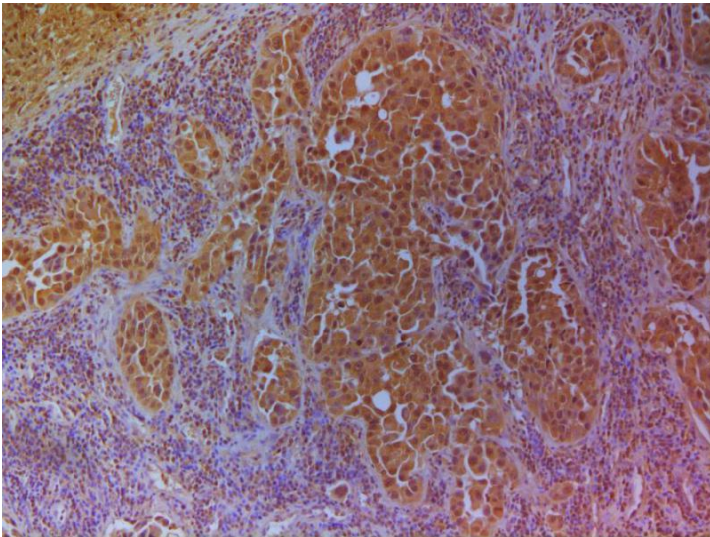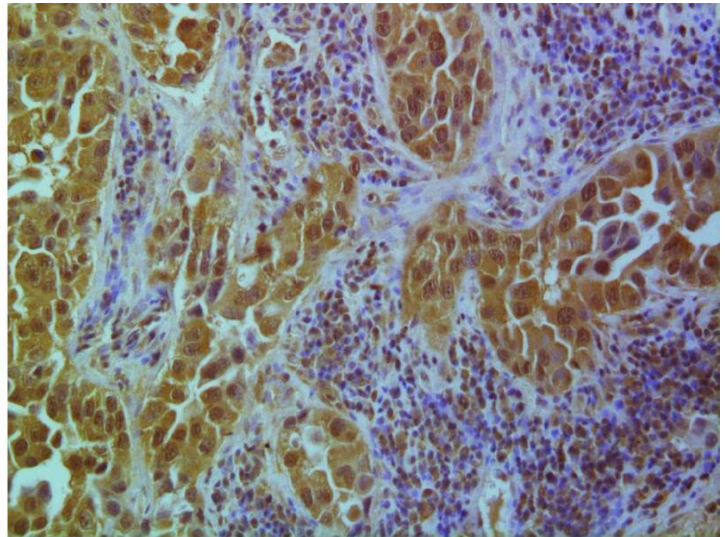

**Figure S21.** Patient Tissue from Mizzou clinical pathology lab was identified as tumor positive for PDL1 by both SP263 antibody kit on autostainer and with peptide using manual IHC



SP263 Kit,  
Autostained.  
Tumor (marked)  
Stains Very  
Faintly

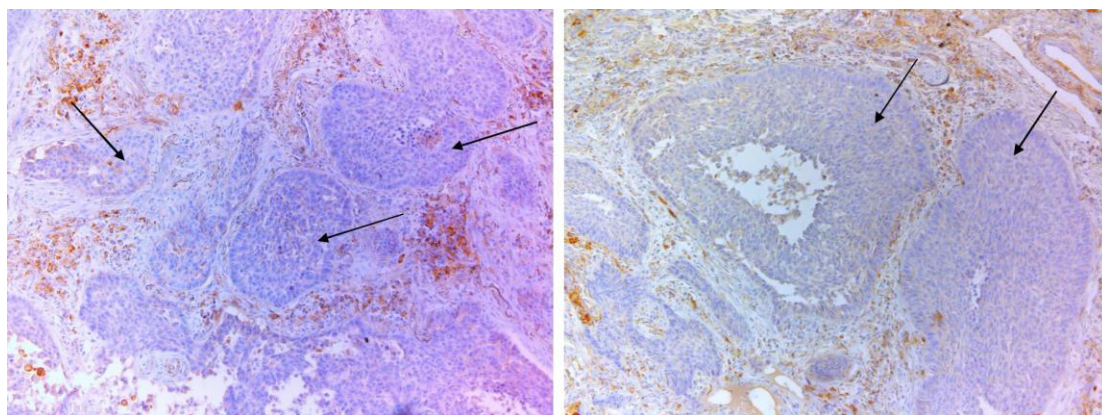

Peptide,  
Manual IHC.  
Heavy Tumor  
Staining.

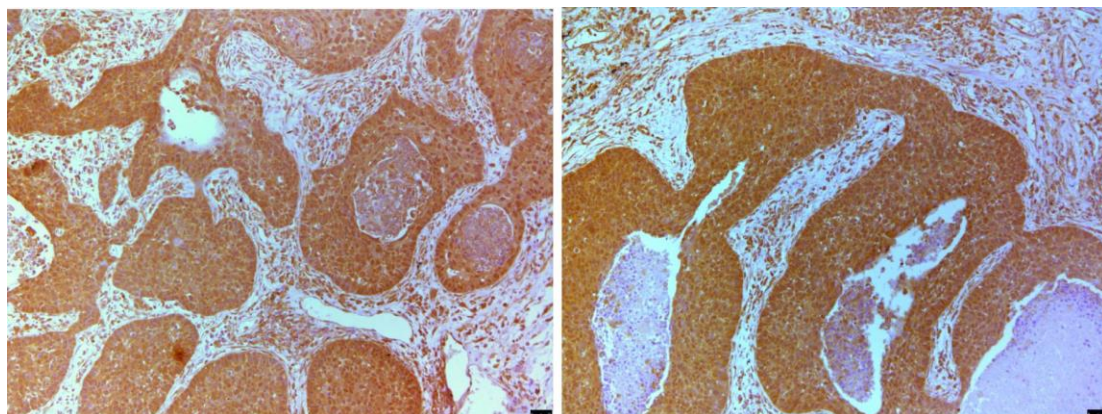

**Figure S22.** Patient A Stained with both SP263 and RK-10-biotin shows heavy staining of the tumor cells by RK-10 peptide but not SP263.

Tissue cut immediately prior to staining with peptide

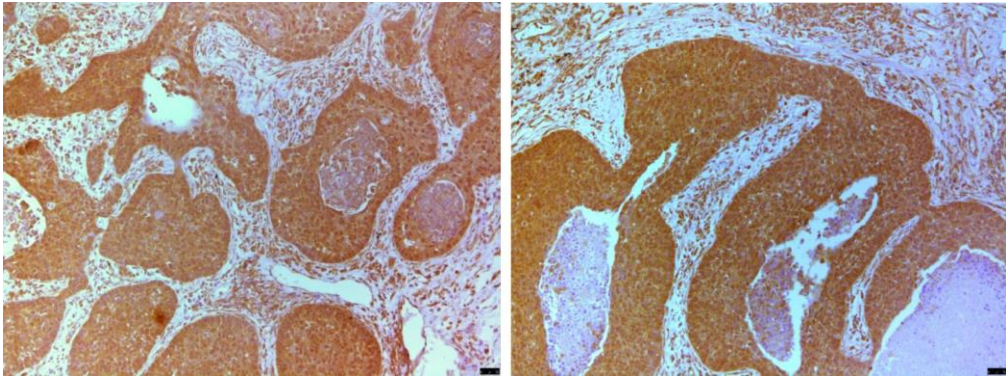

Tissue Cut 3 Months Prior to Staining (April-July)

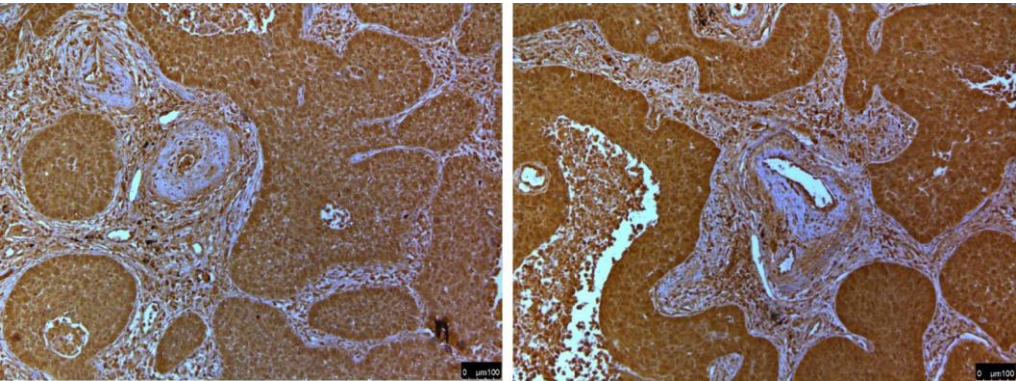

**Figure S23:** Patient A IHC with RK-10-Biotin: Tissue Cut 3 Months Prior To Staining



SP263 Kit,  
Autostain  
ed.  
Faint/No  
Tumor  
staining

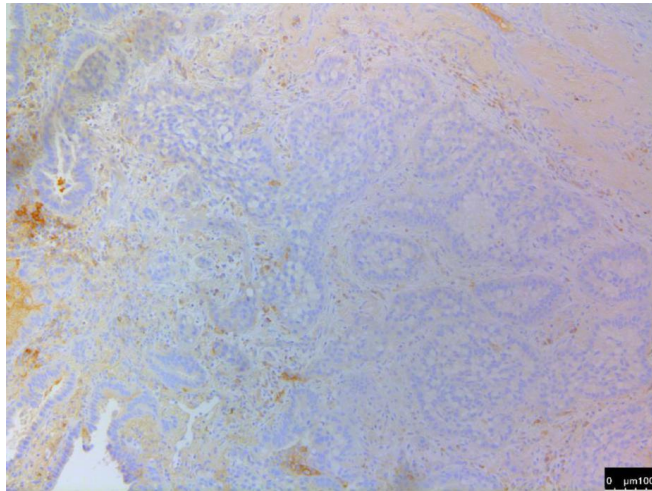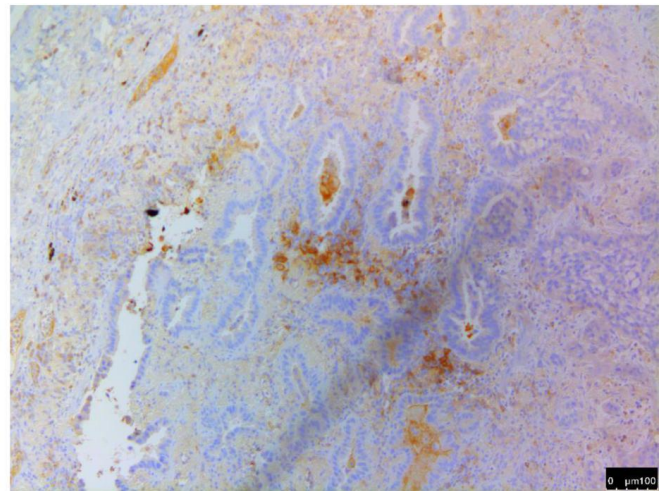

Peptide,  
Manual  
IHC. Good  
Tumor  
staining.

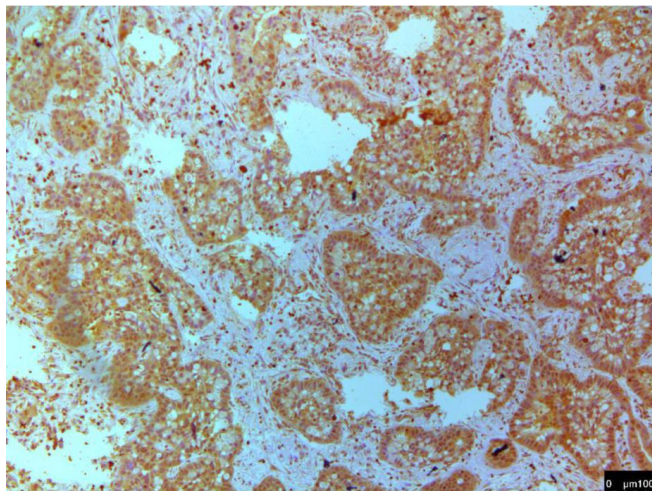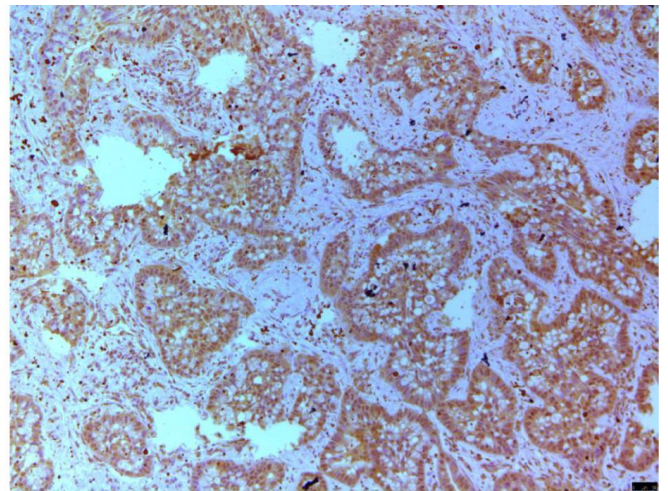

**Figure S24:** Patient B stained with SP263 and RK-10-Biotin shows specific staining in the tumor region using RK-10.



SP263  
Kit,  
Autostain  
ed. Some  
tumor  
areas  
stain

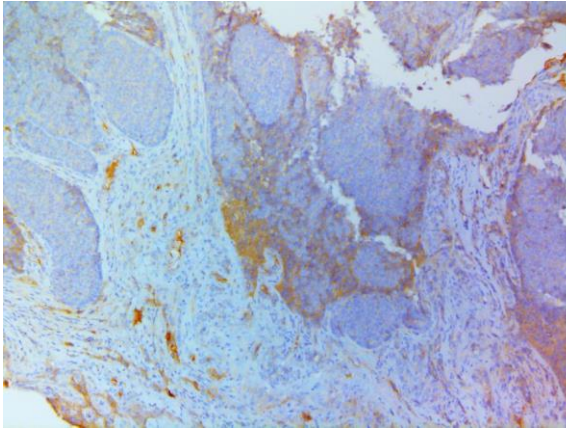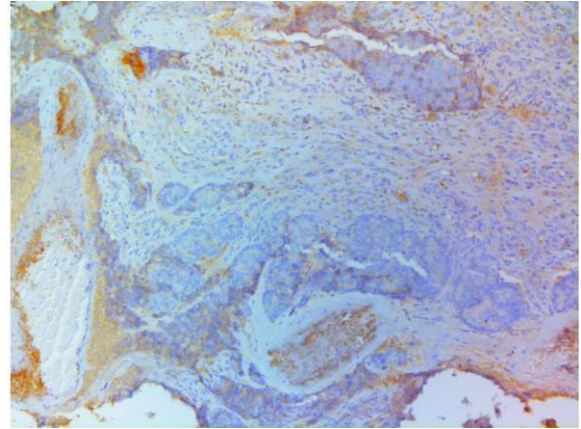

Peptide,  
Manual  
IHC.  
Consistent  
Tumor  
staining.

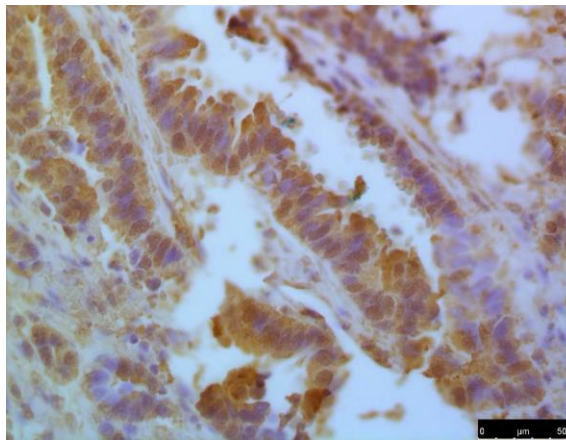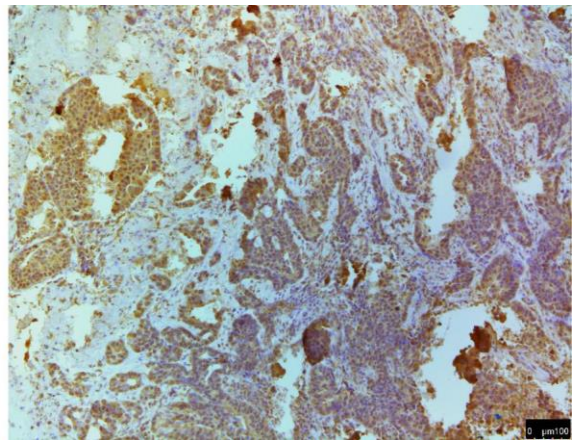

**Figure S25:** Patient C stained with SP263 and RK-10-biotin

SP263 Kit,  
Autostained.  
Faint/spotty  
tumor staining

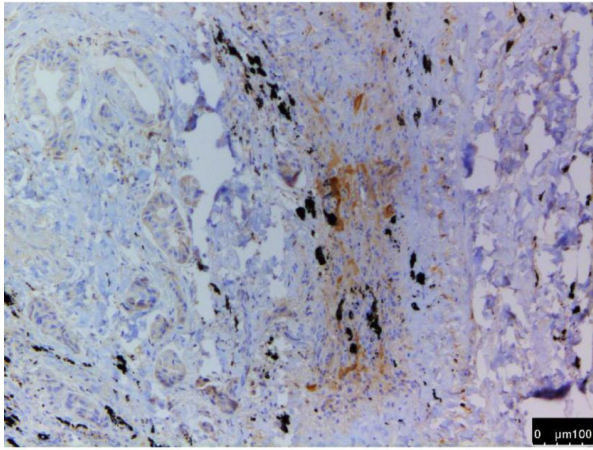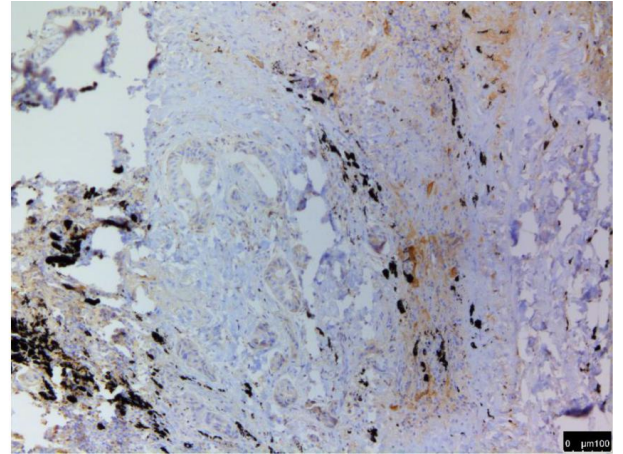

Peptide,  
Manual IHC.  
Good  
Tumor  
staining.

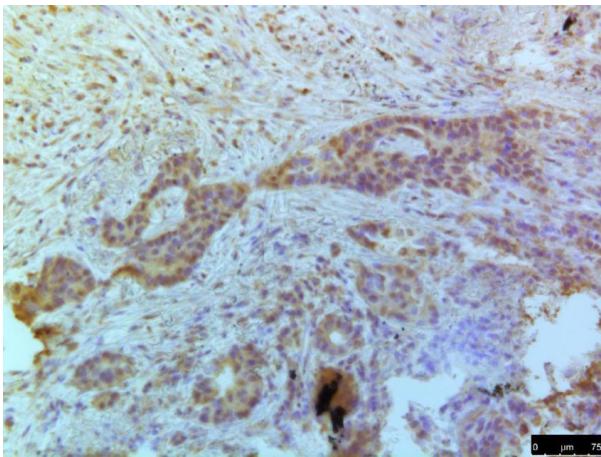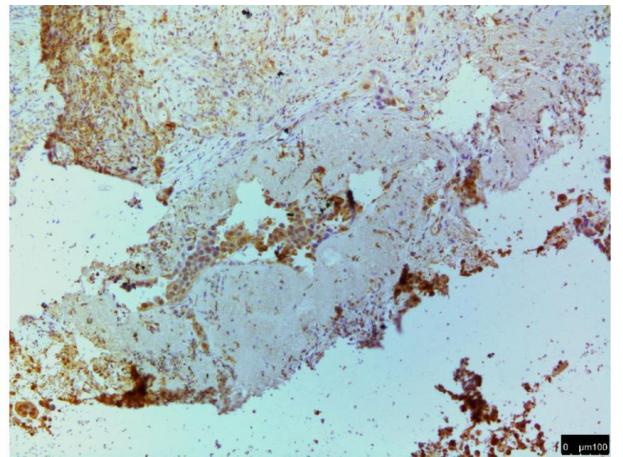

**Figure S26:** Patient D Stained with SP263 and RK-10-Biotin



SP263 Kit,  
Autostained.  
Faint/No  
Tumor  
staining

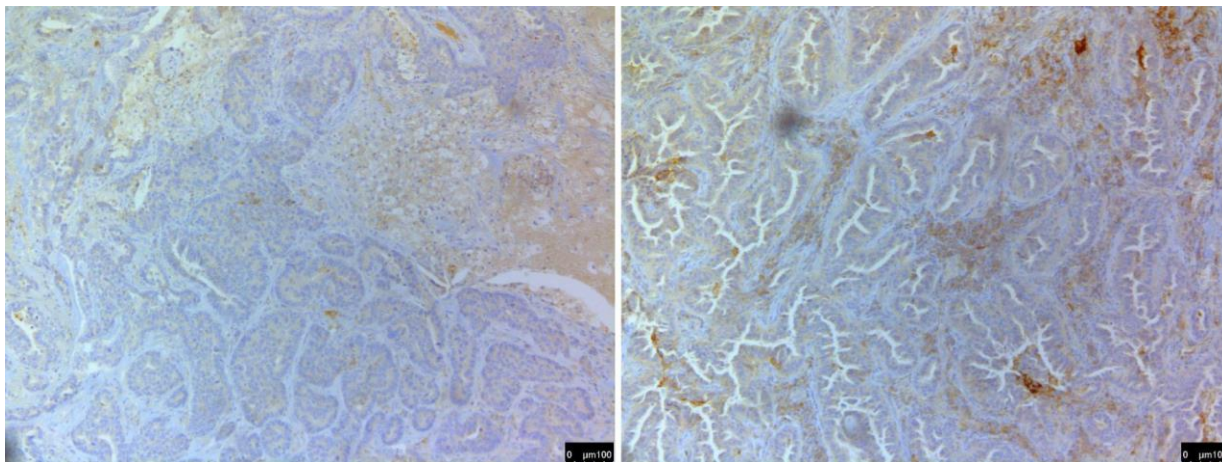

Peptide,  
Manual IHC.  
Good Tumor  
staining.

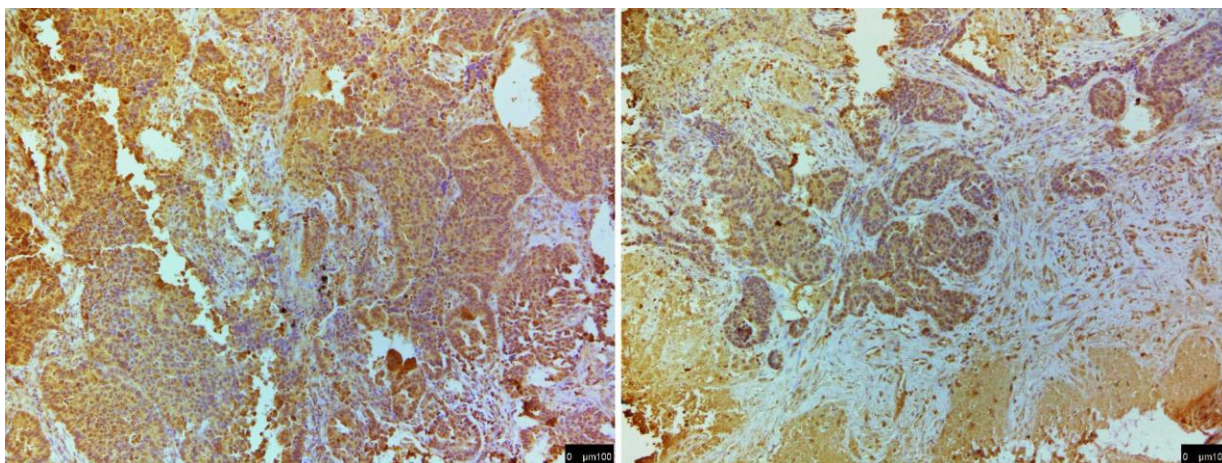

**Figure S27.** Patient E Stained with SP263 or RK-10-Biotin

SP263 Kit,  
Autostained.  
Very faint  
staining seen

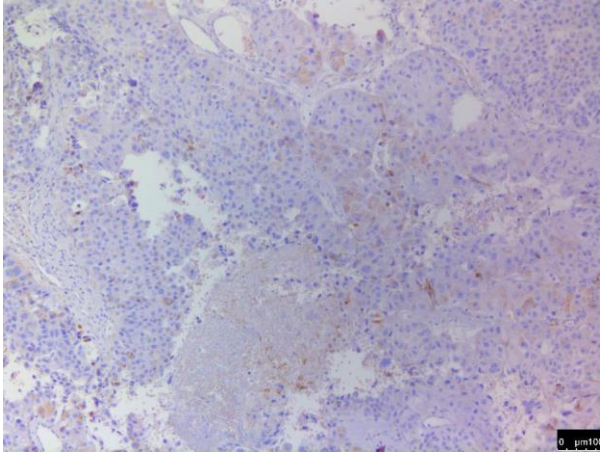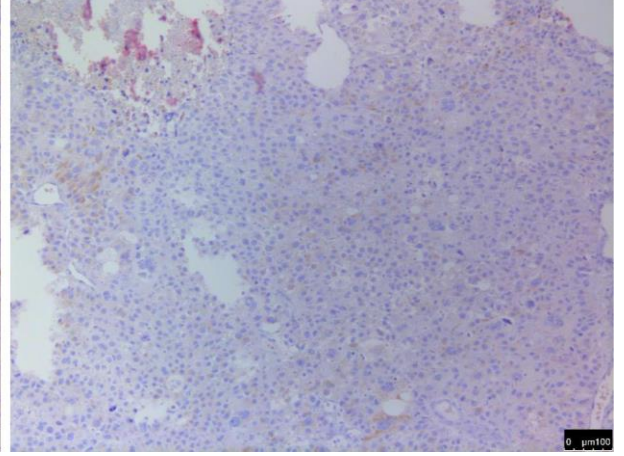

Peptide,  
Manual IHC.  
Tumor stains  
heavily.

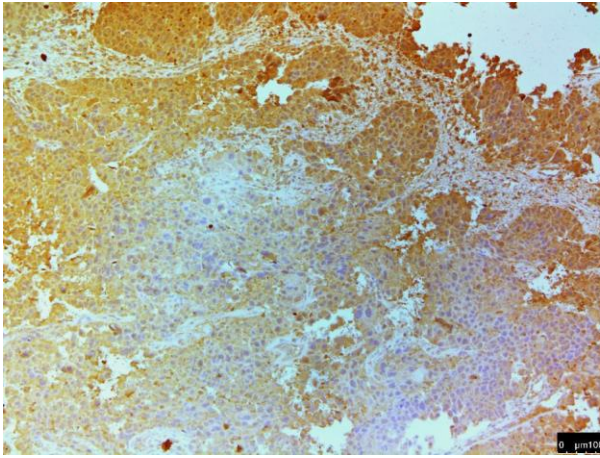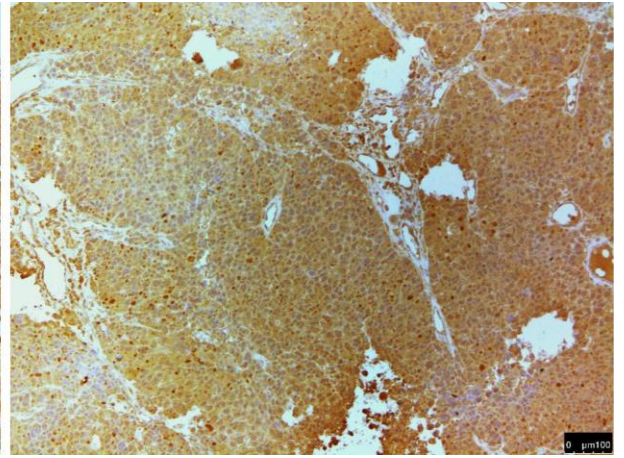

**Figure S28.** Patient F stained with SP263 and RK-10-Biotin



SP263 Kit,  
Autostained  
. Tumor  
Stains  
reliably

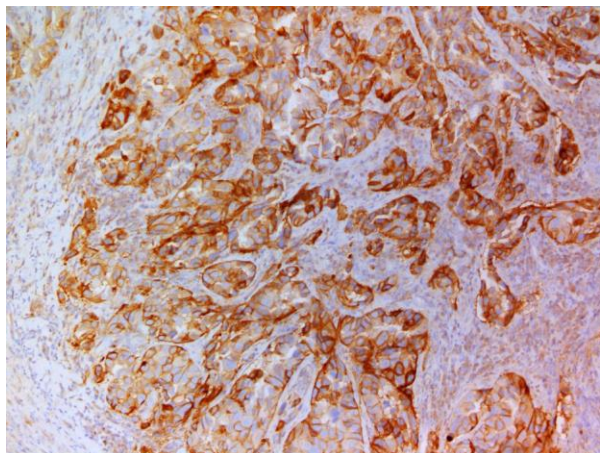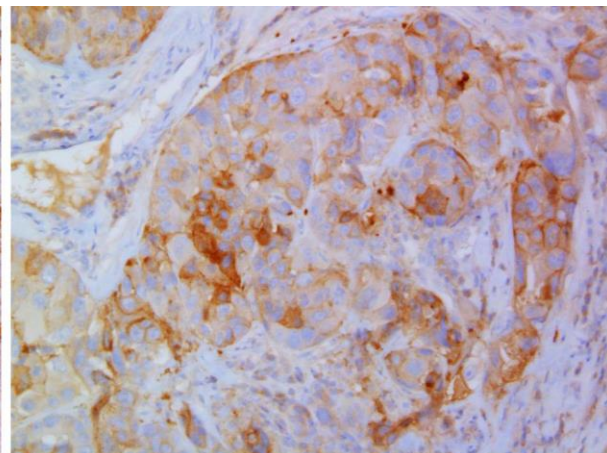

Peptide,  
Manual IHC.  
Tumor  
stains  
heavily.

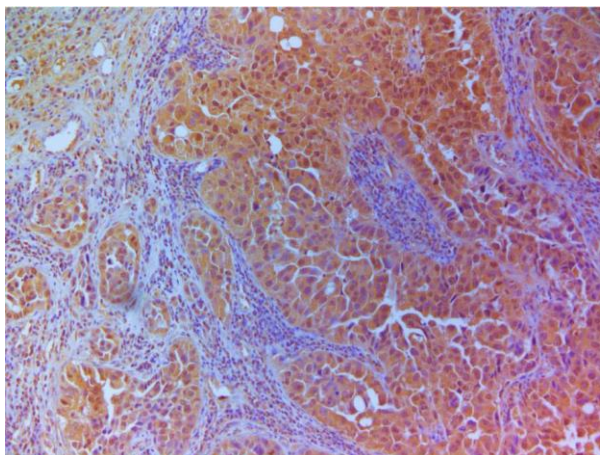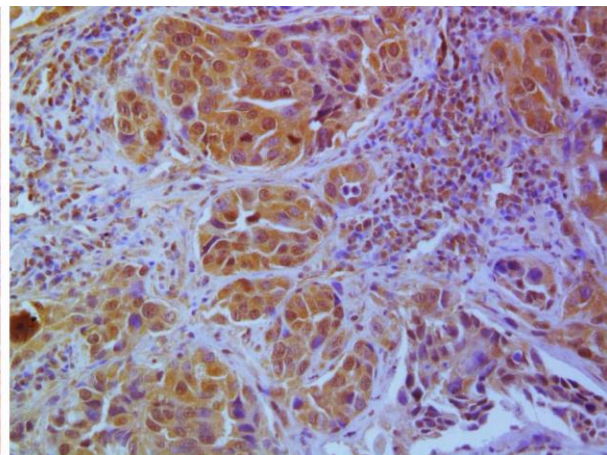

**Figure S29.** Patient G Stained with SP263 or RK-10-Biotin.

SP263 Kit,  
Autostained.  
Faint/No Tumor  
staining

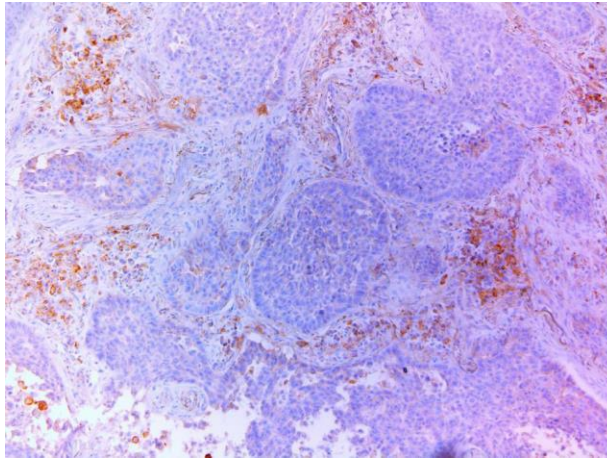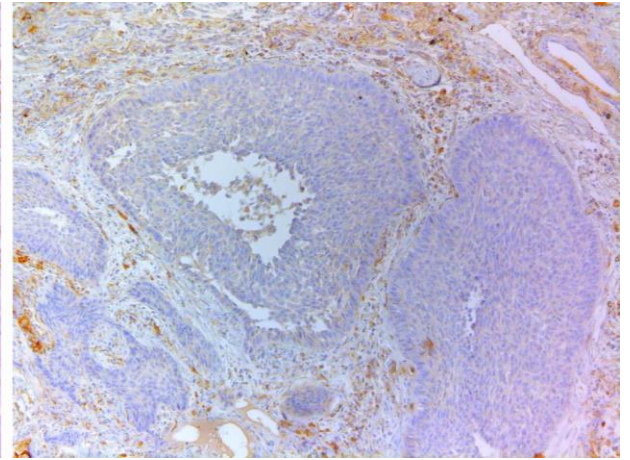

Peptide,  
Manual IHC.  
Very heavy  
tumor staining.

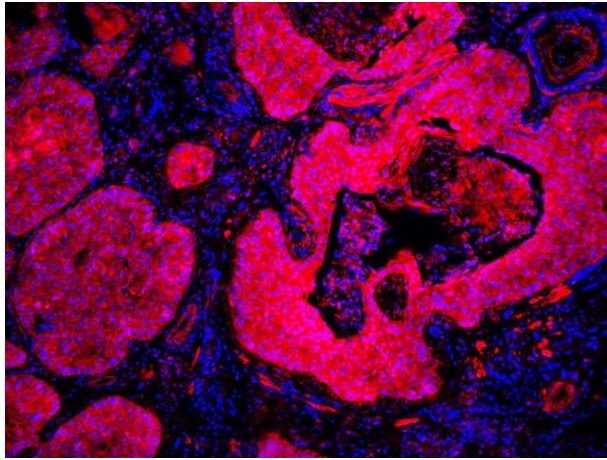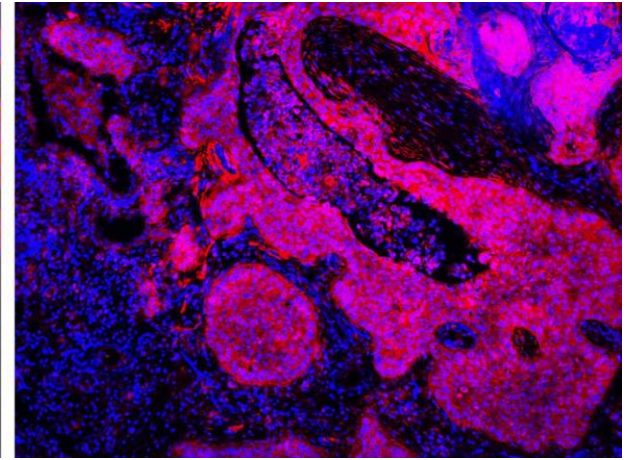

**Figure S30** Patient A Stained with either SP263 or RK-10-Cy5



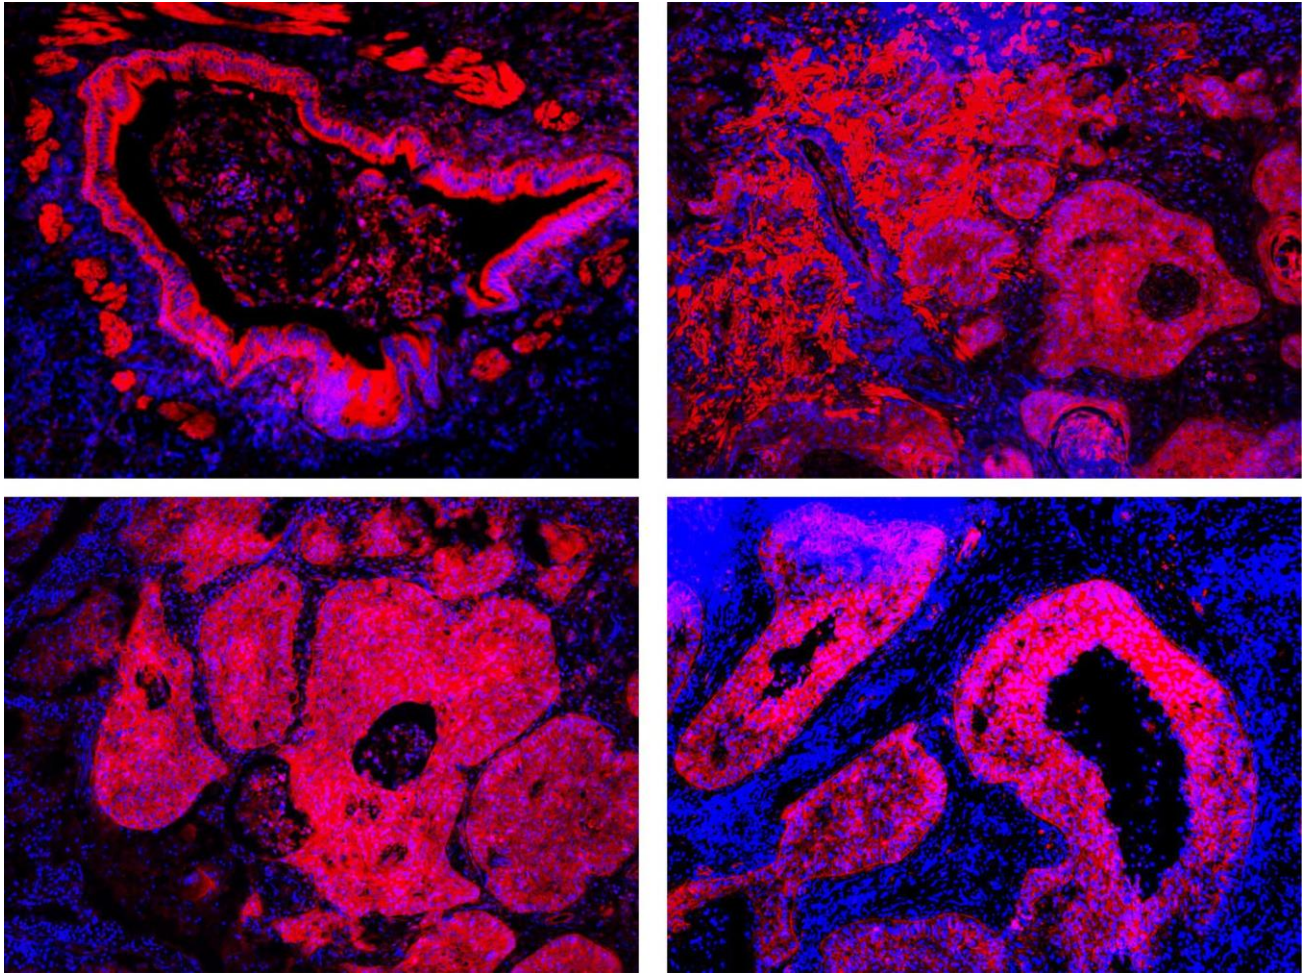

**Figure S31** Patient A stained with RK-10-Cy5 clearly delineates tumor areas



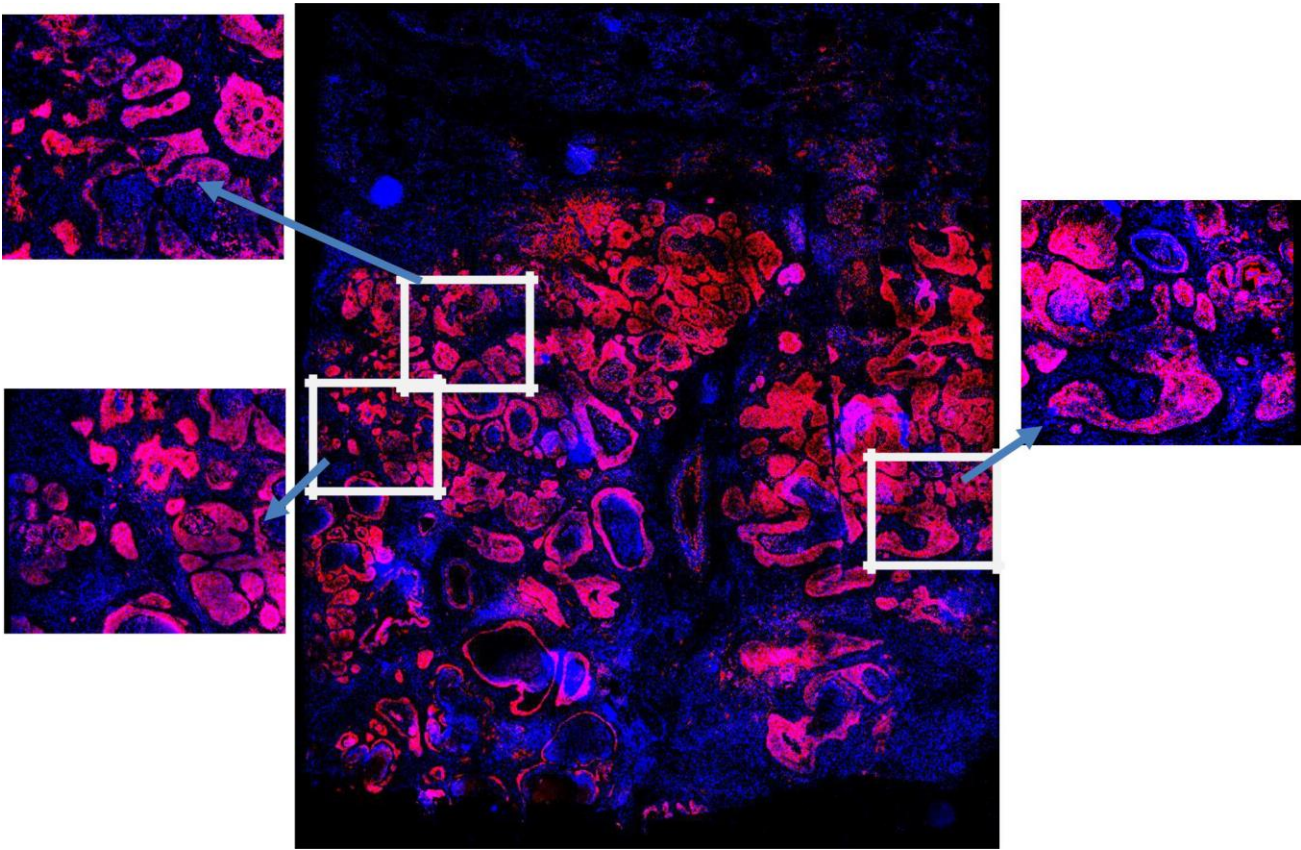

**Figure S32** Whole slide scan of Patient A stained with RK-10-Cy5 identifies tumor areas

SP263 Kit,  
Autostained.  
Faint/No Tumor  
staining

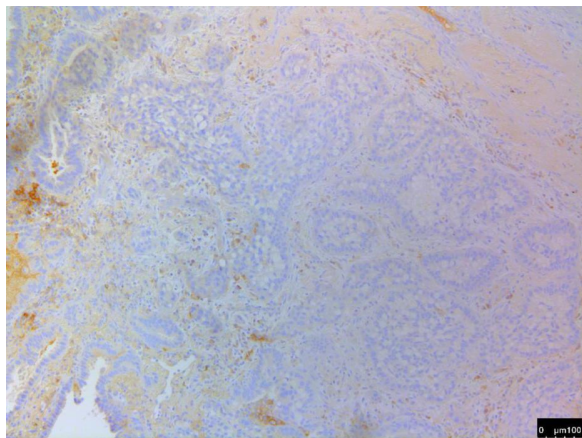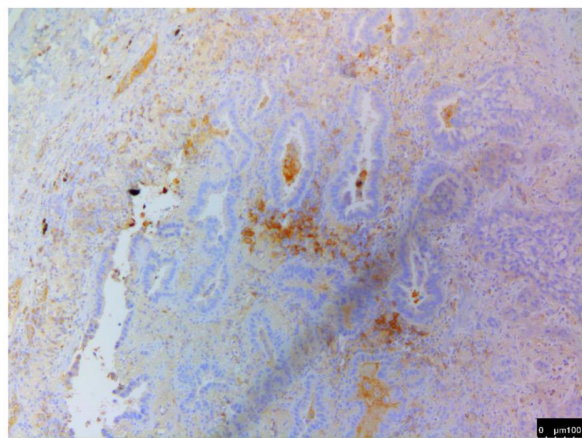

Peptide,  
Manual IHC

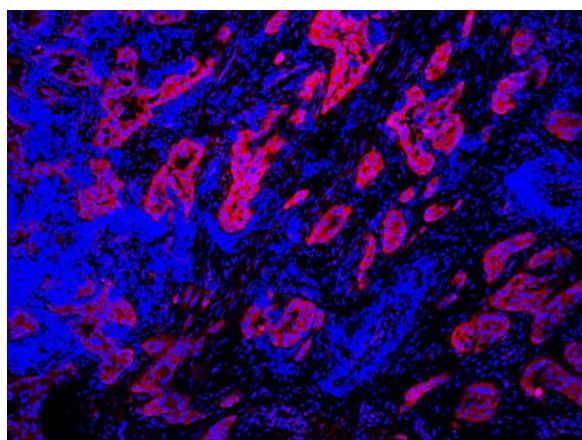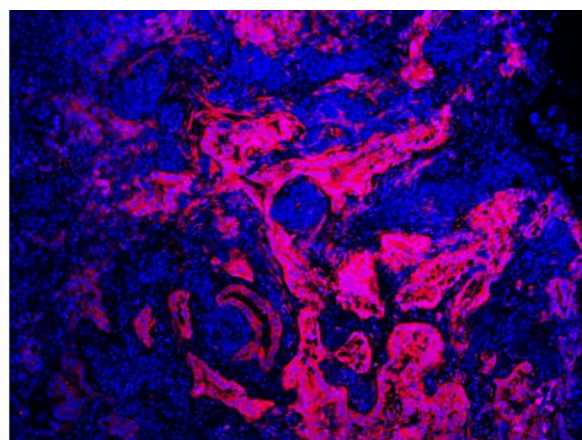

**Figure S33.** Patient B Stained with SP263 or RK-10-Cy5



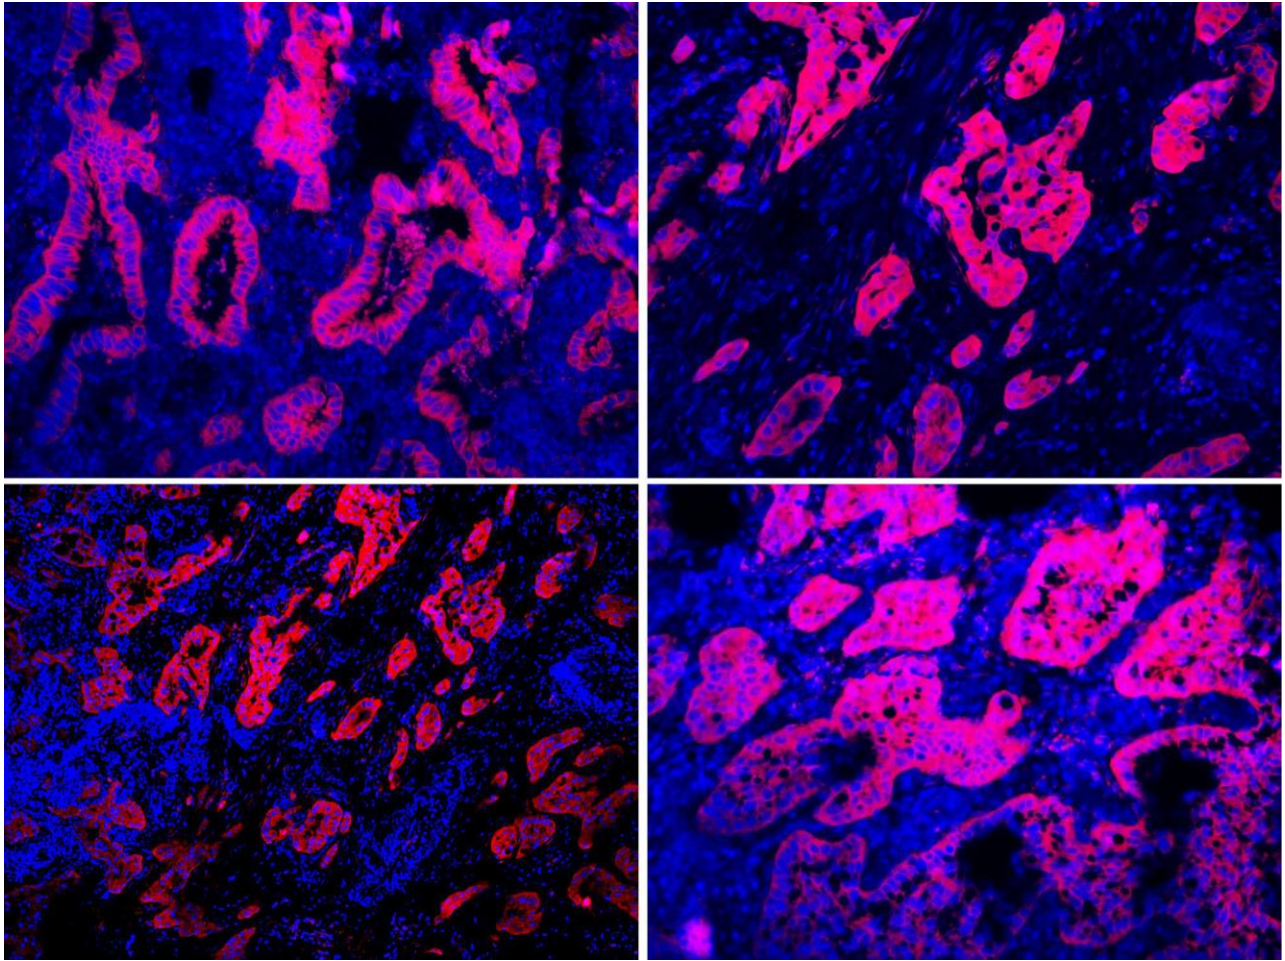

**Figure S34.** Patient B Stained with RK-10-Cy5 clearly delineates tumor regions

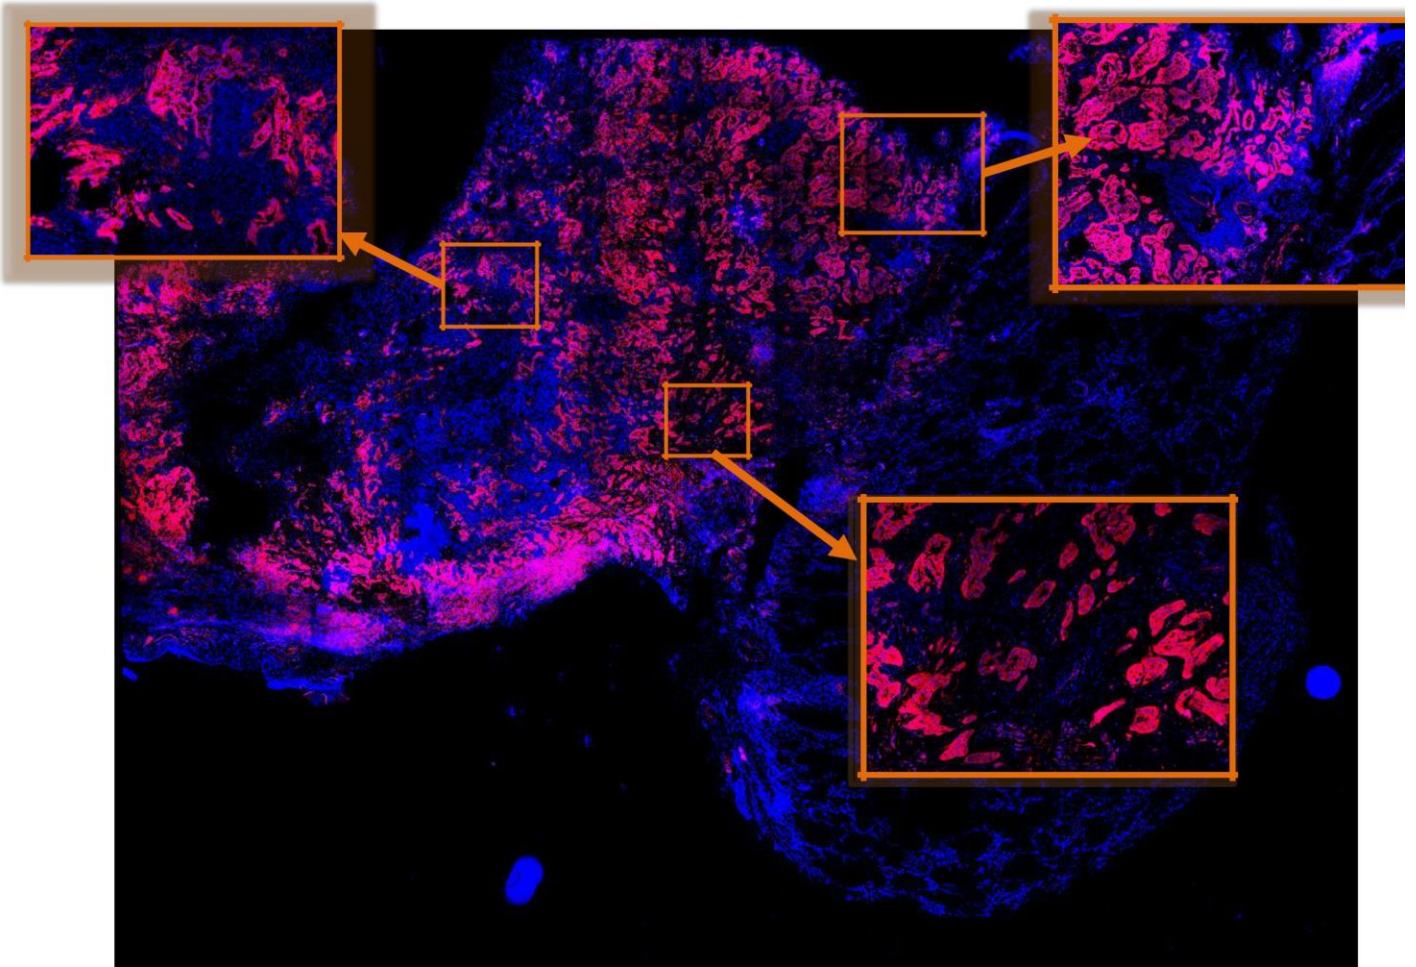

**Figure S35** Whole slide scan of patient B Stained with RK-10-Cy5 clearly identifies tumor regions



SP263 Kit,  
Autostained.  
Faint/No  
Tumor staining

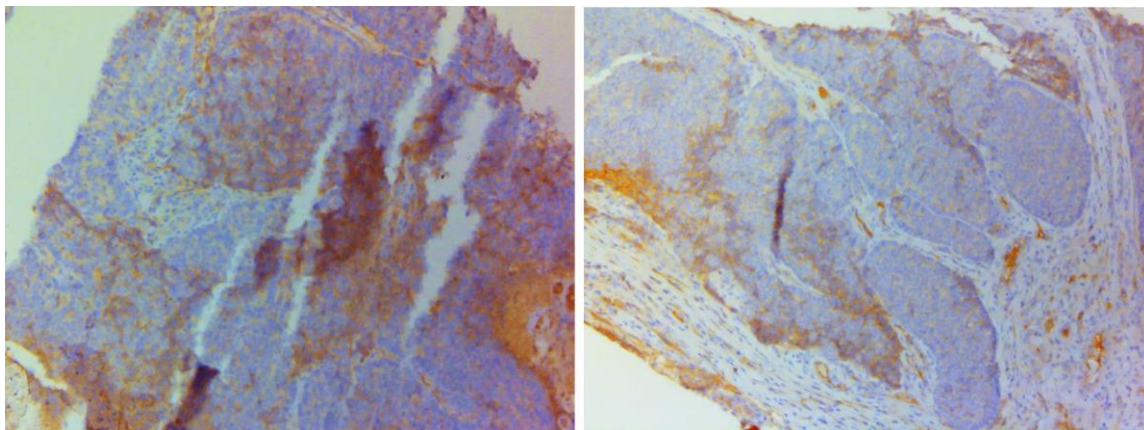

Peptide,  
Manual IHC

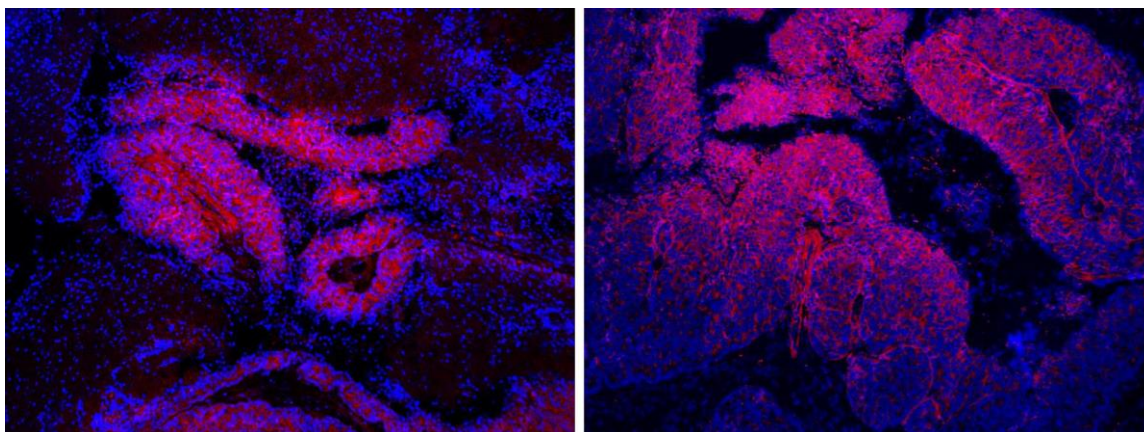

**Figure S36** Patient C Stained with SP263 or RK-10-Cy5

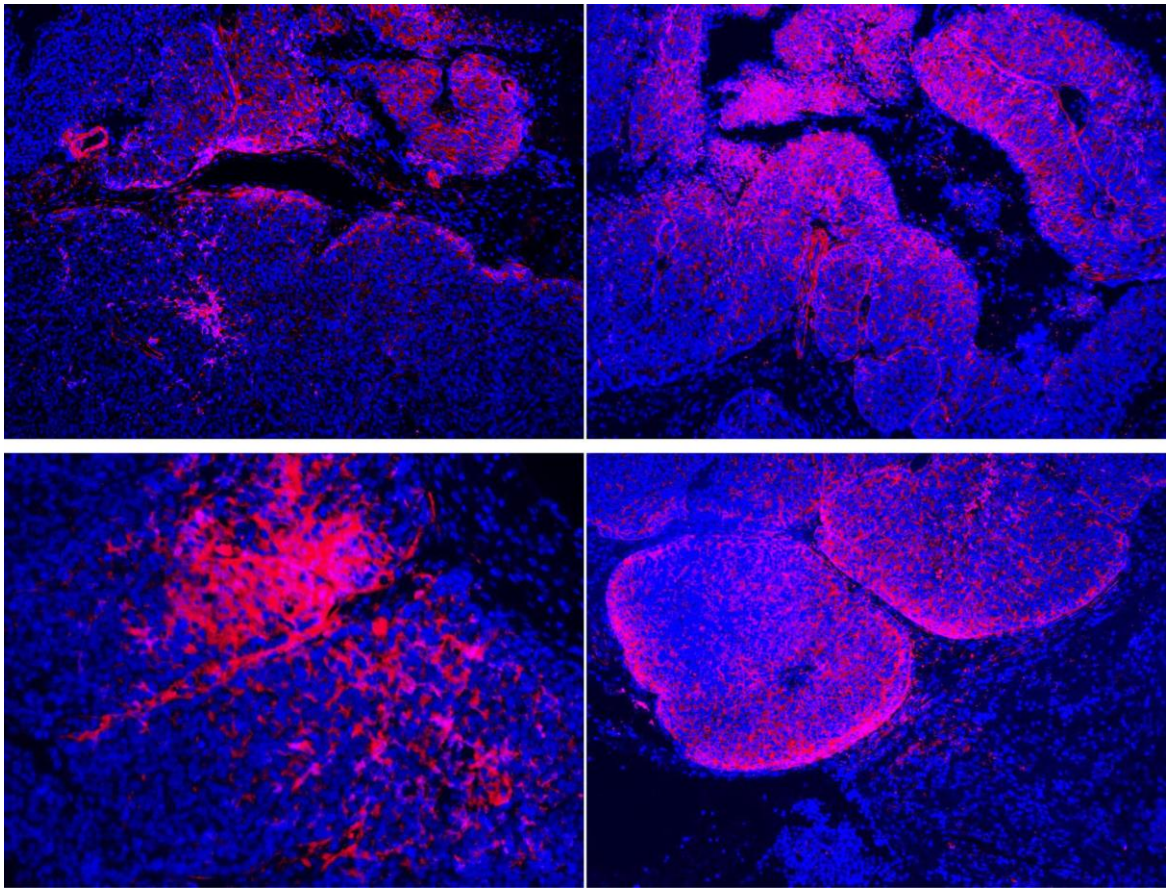

**Figure S37** Patient C Stained with RK-10-Cy5 stains some regions of the tumor



SP263 Kit,  
Autostained.

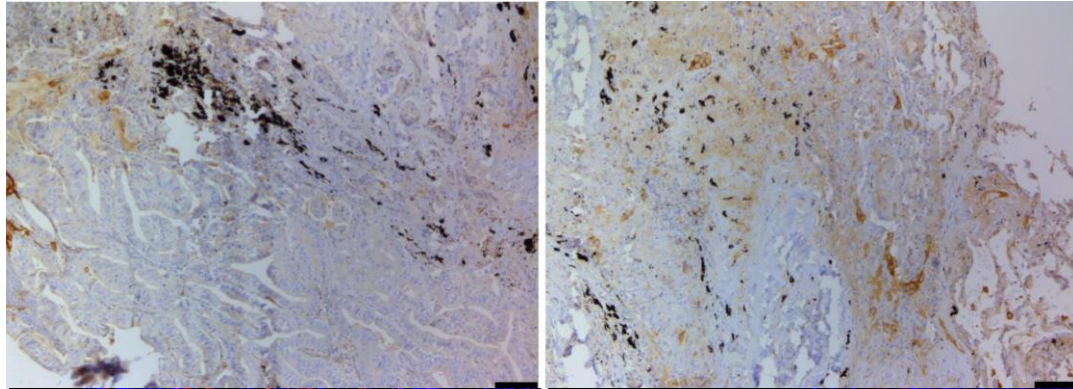

Peptide,  
Manual IHC

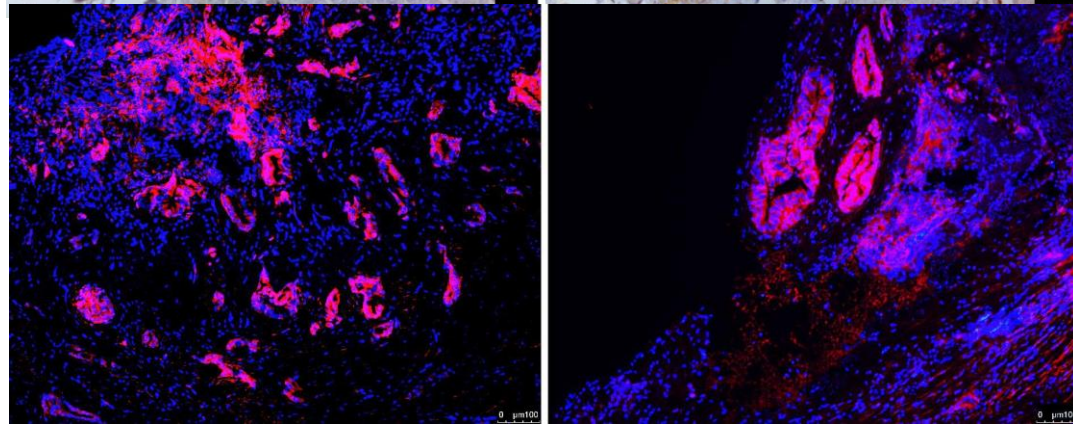

**Figure S38** Patient D Stained with SP263 or RK-10-Cy5



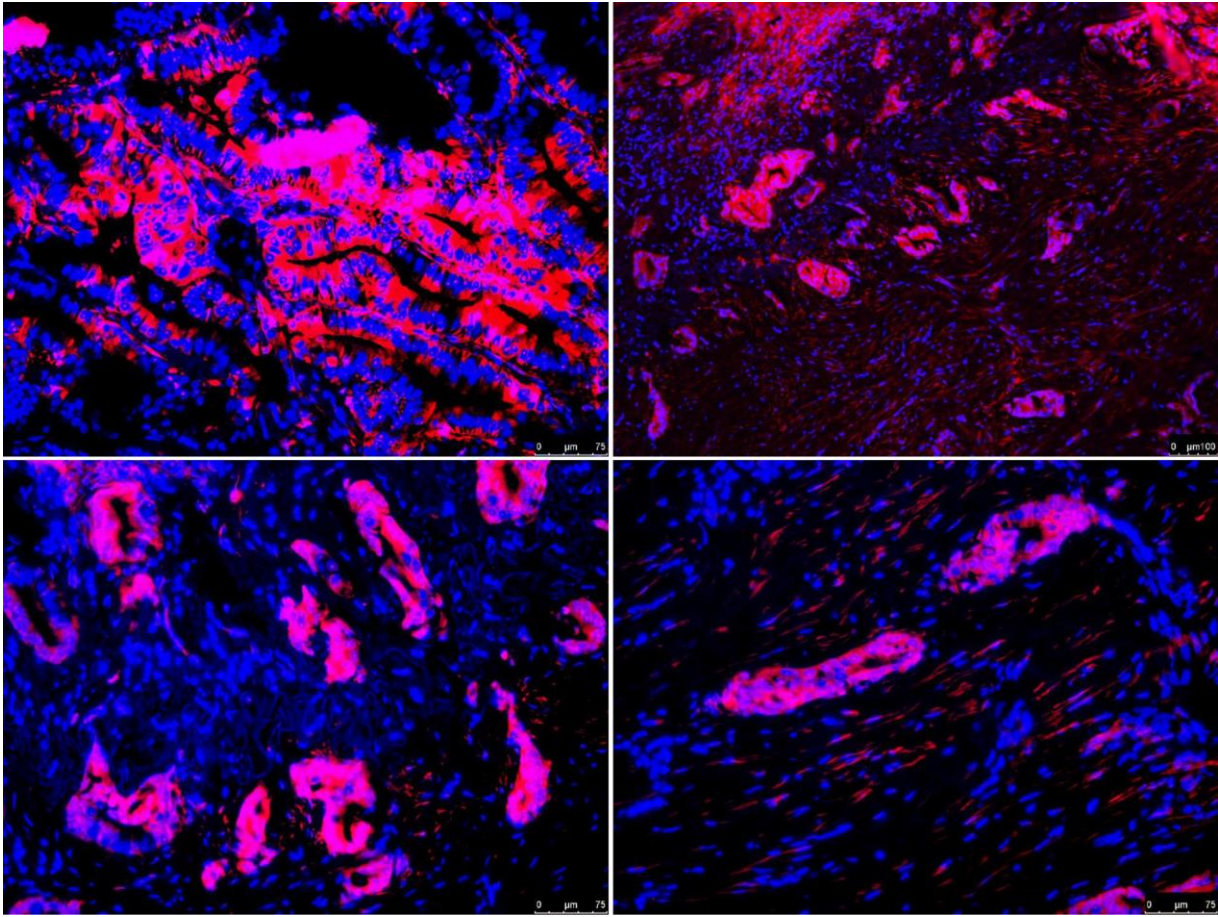

**Figure S39** Patient D Stained with RK-10-Cy5

SP263 Kit,  
Autostained.  
Faint/No Tumor  
staining

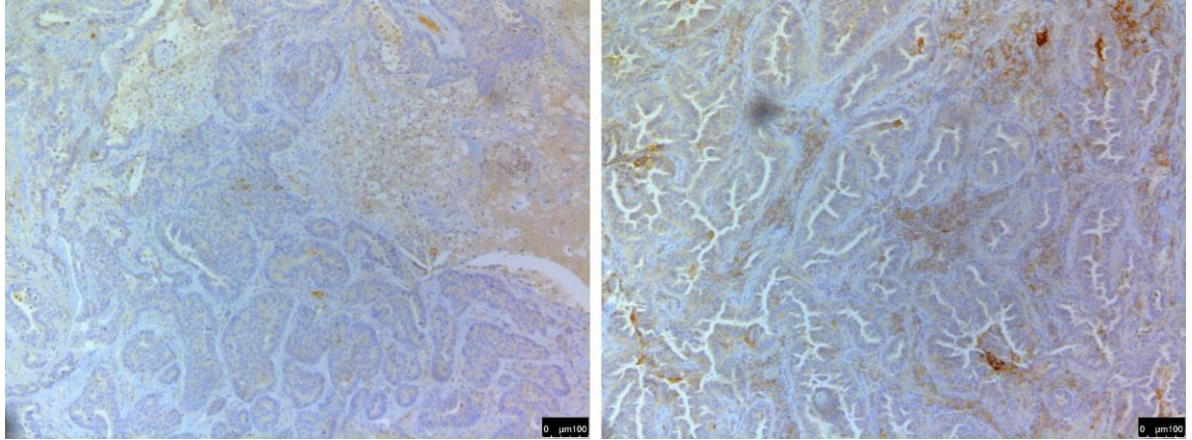

Peptide,  
Manual IHC

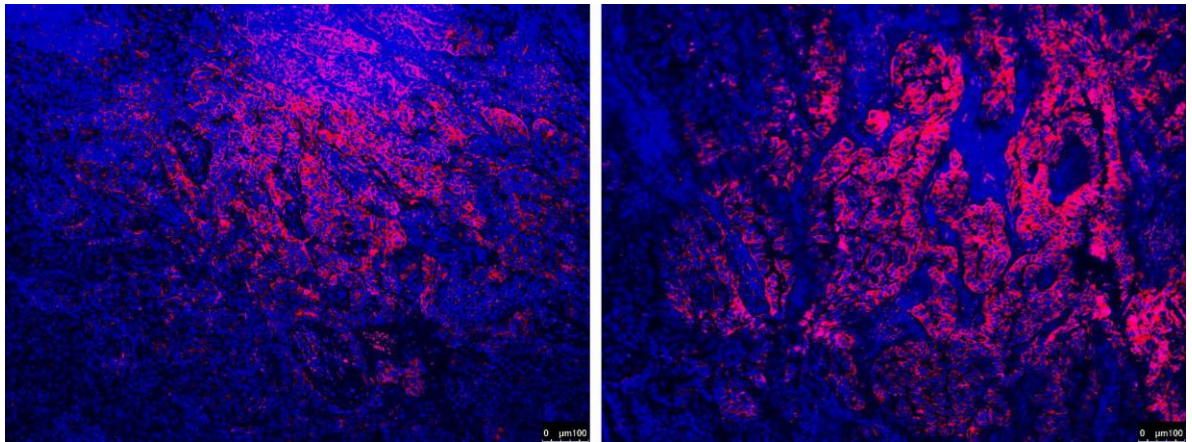

**Figure S40** Patient E stained with SP263 or RK-10-Cy5



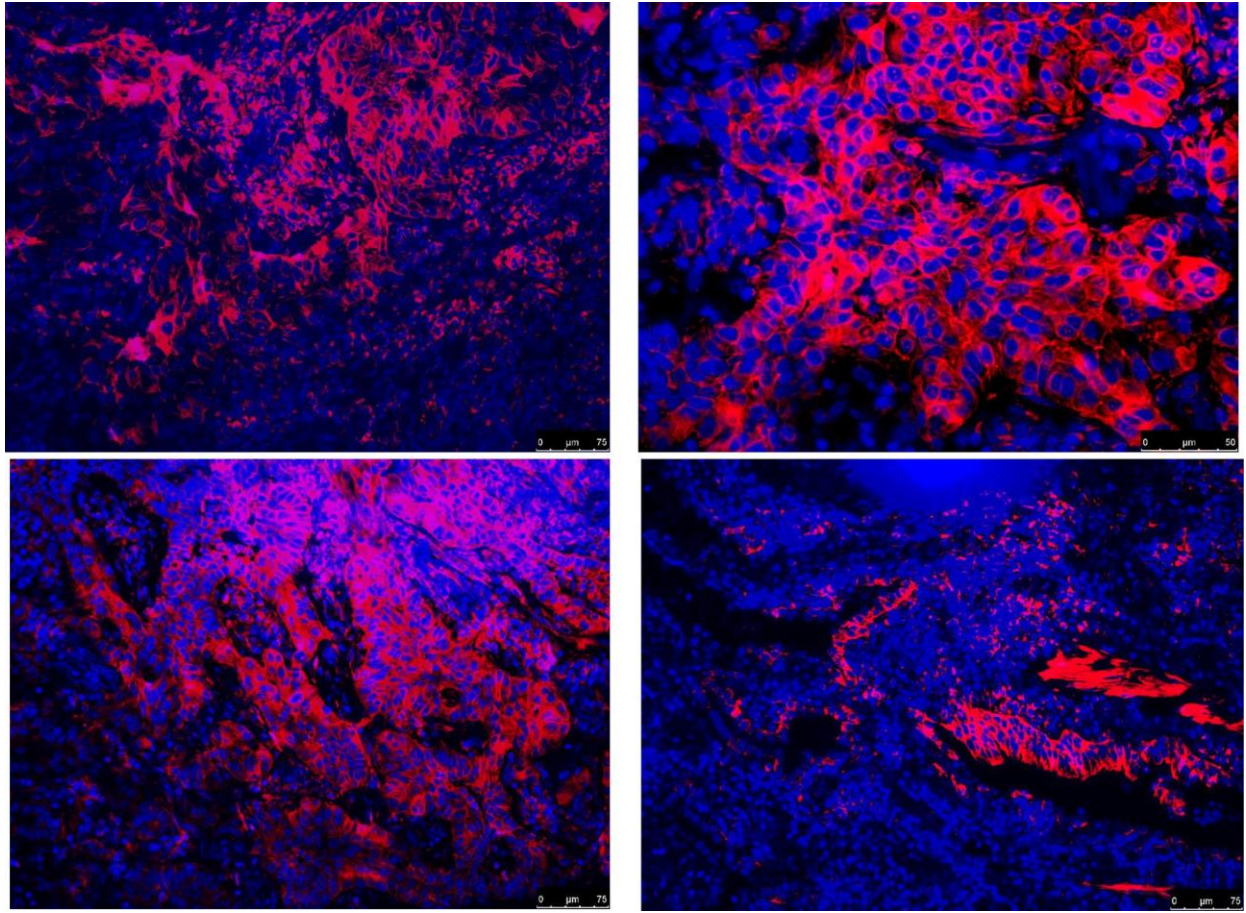

**Figure S41** Patient E Stained with RK-10-Cy5

SP263 Kit,  
Autostained.

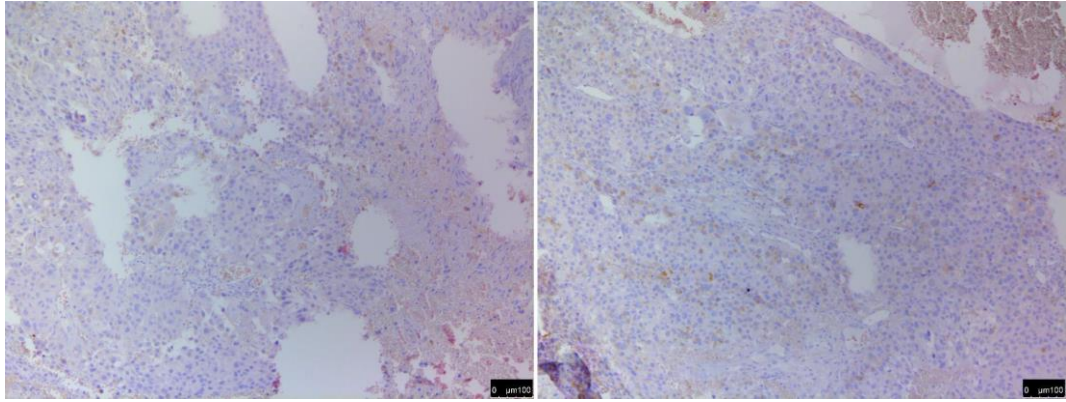

Peptide,  
Manual IHC

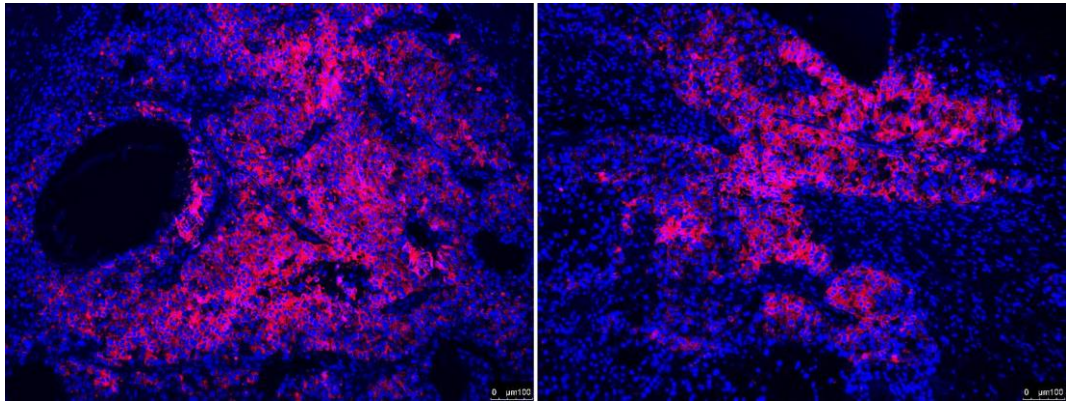

**Figure S42** Patient F stained with SP263 or RK-10-Cy5



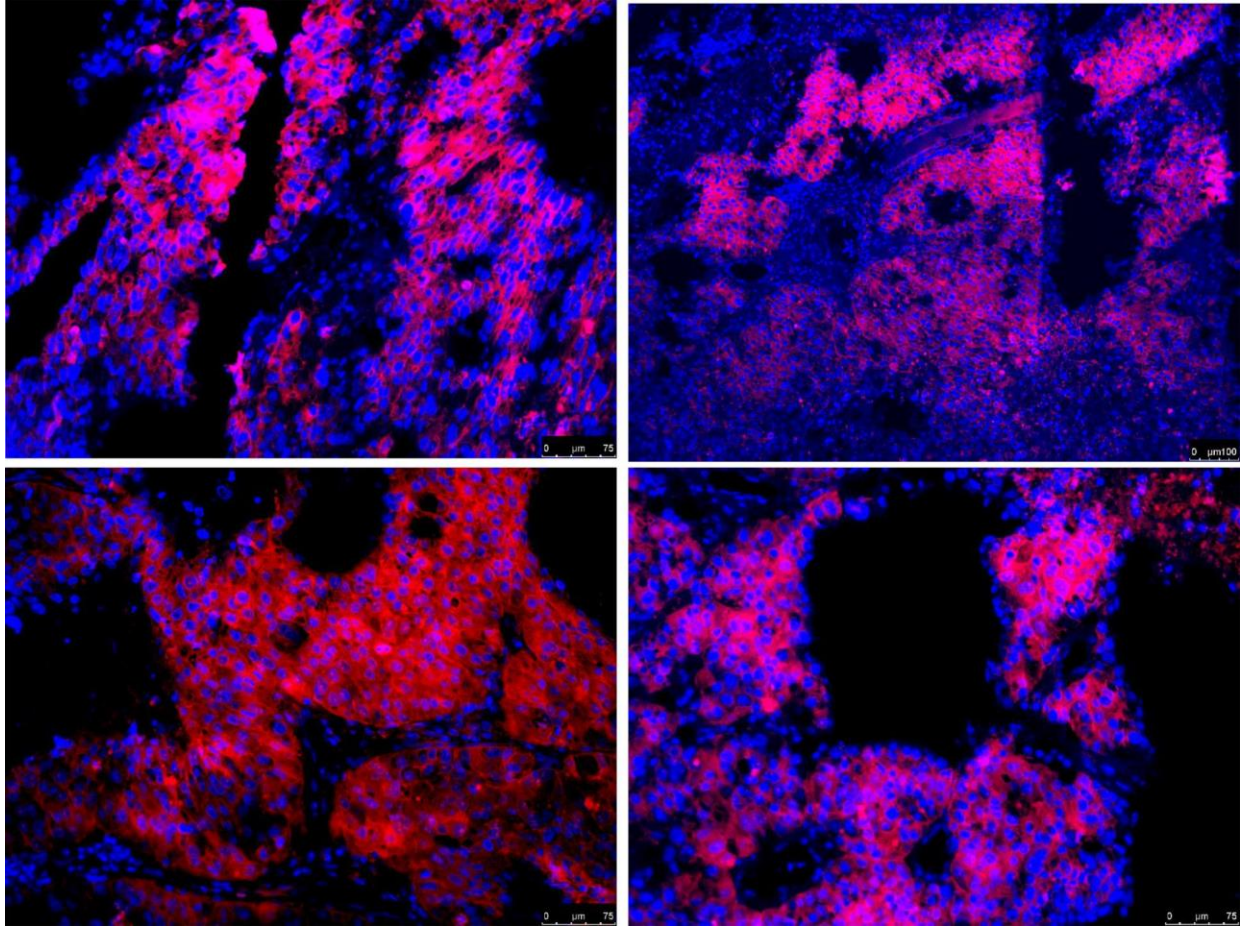

**Figure S43** Patient F Stained with RK-10-Cy5

SP263 Kit,  
Autostained

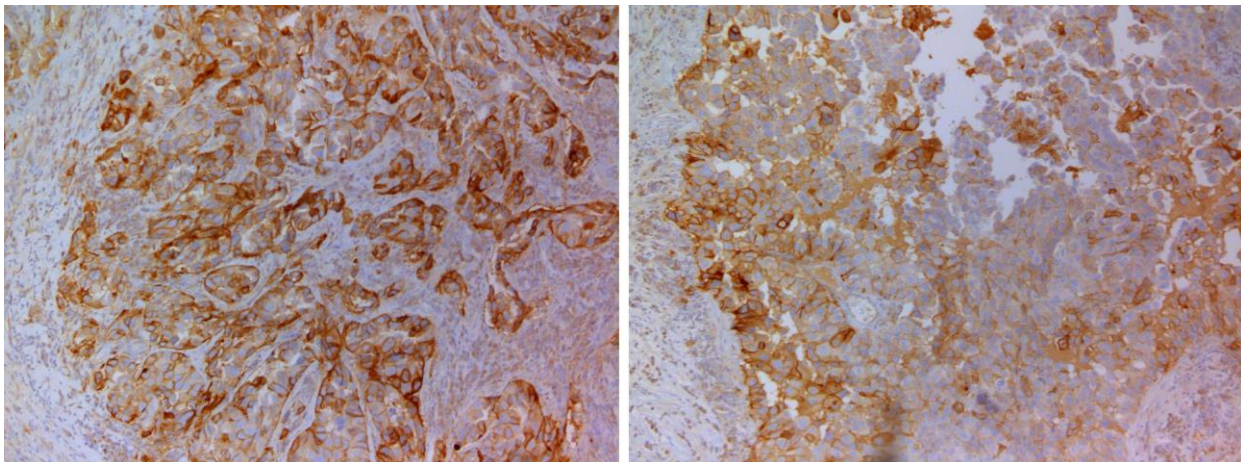

Peptide,  
Manual IHC

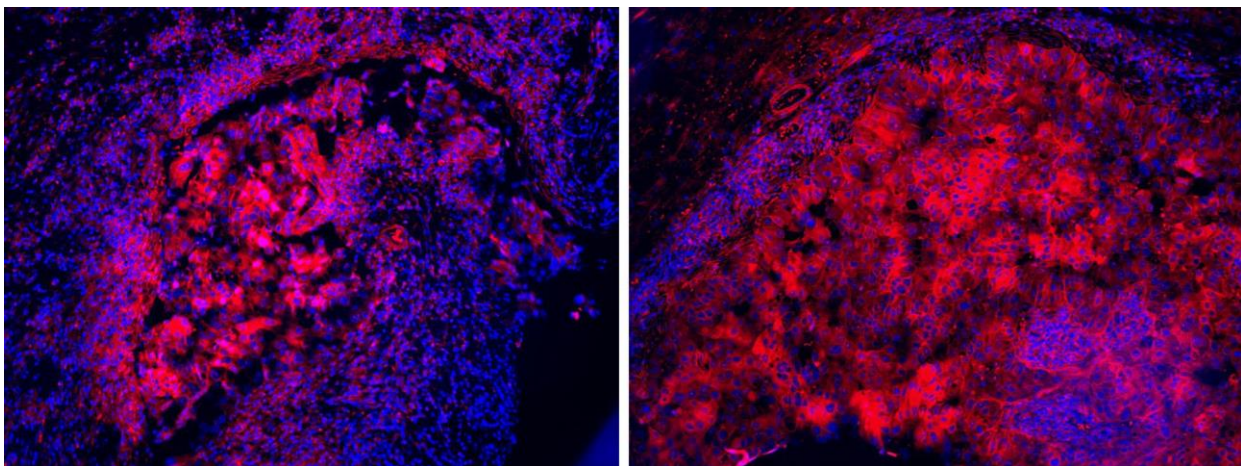

**Figure S44** Patient G Stained with SP263 or RK-10-Cy5



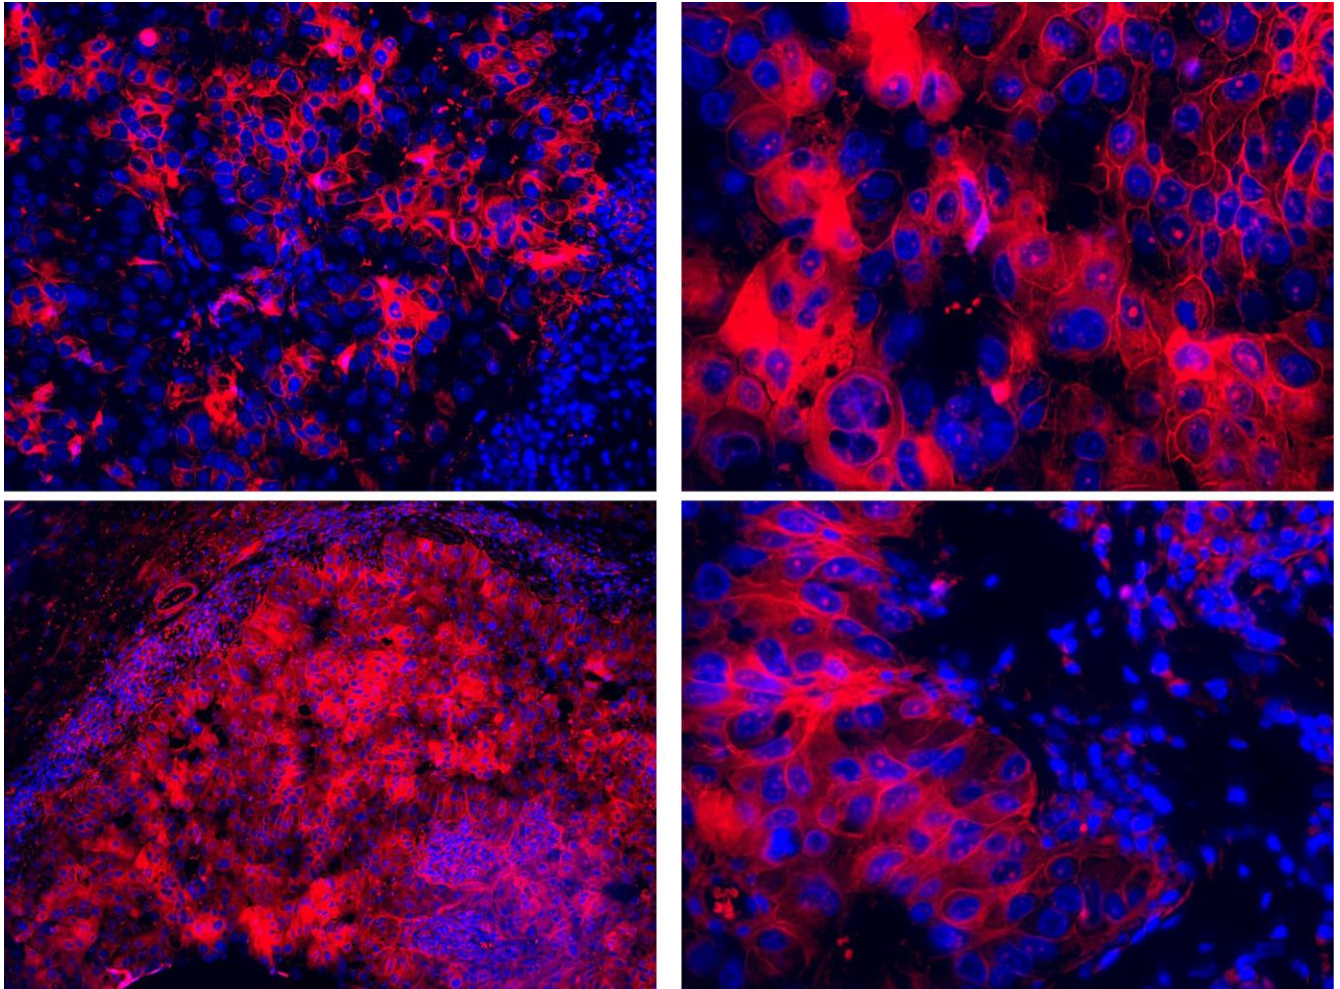

**Figure S45** Patient G Stained with RK-10-Cy5



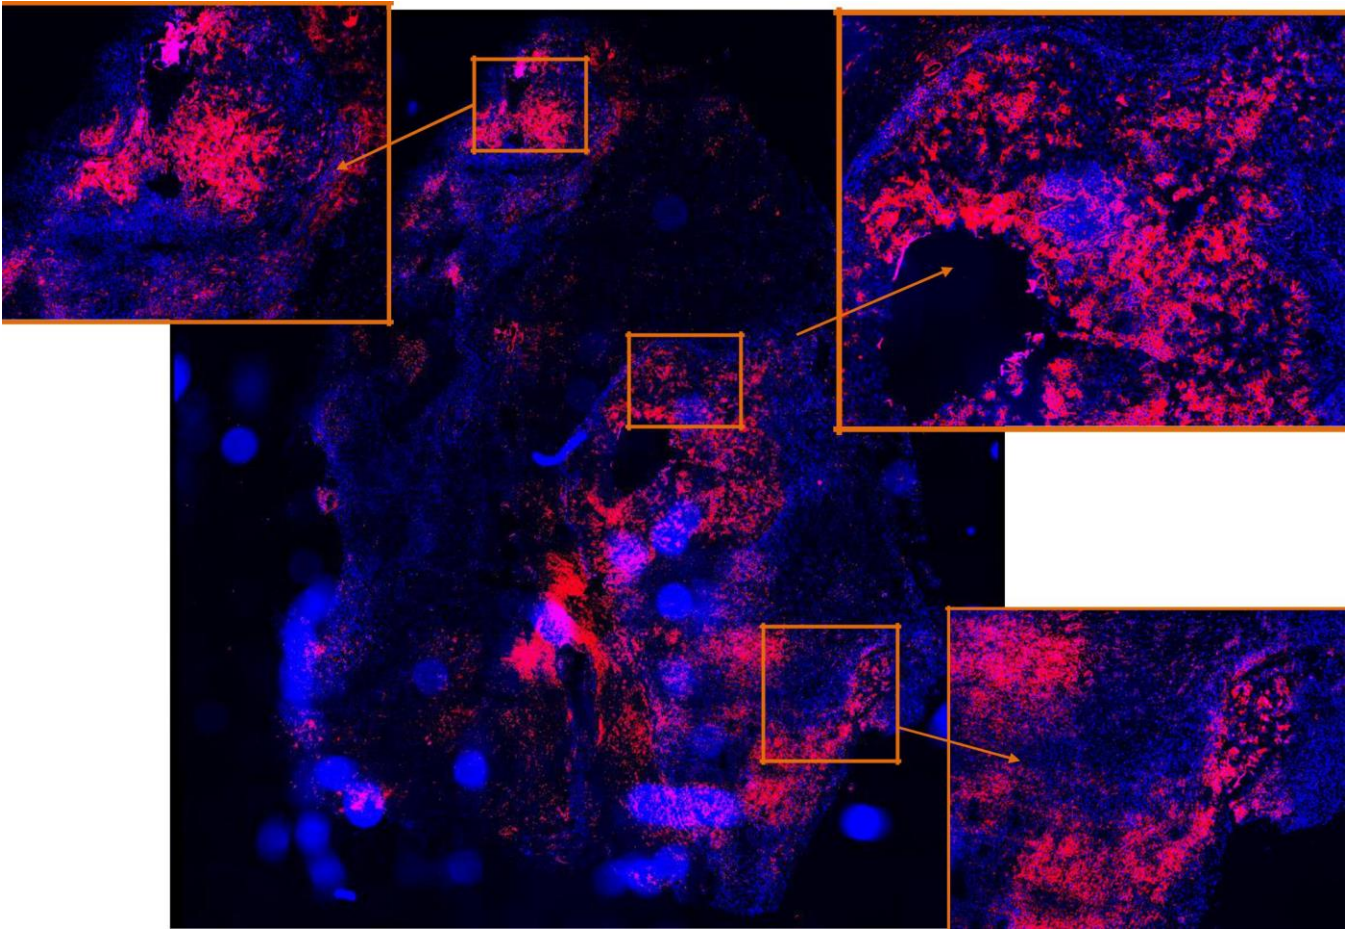

**Figure S46** Whole slide scan of Patient G stained with RK-10-Cy5 shows tumor areas clearly highlighted by PD-L1 expression

**Microarray Panel Display**

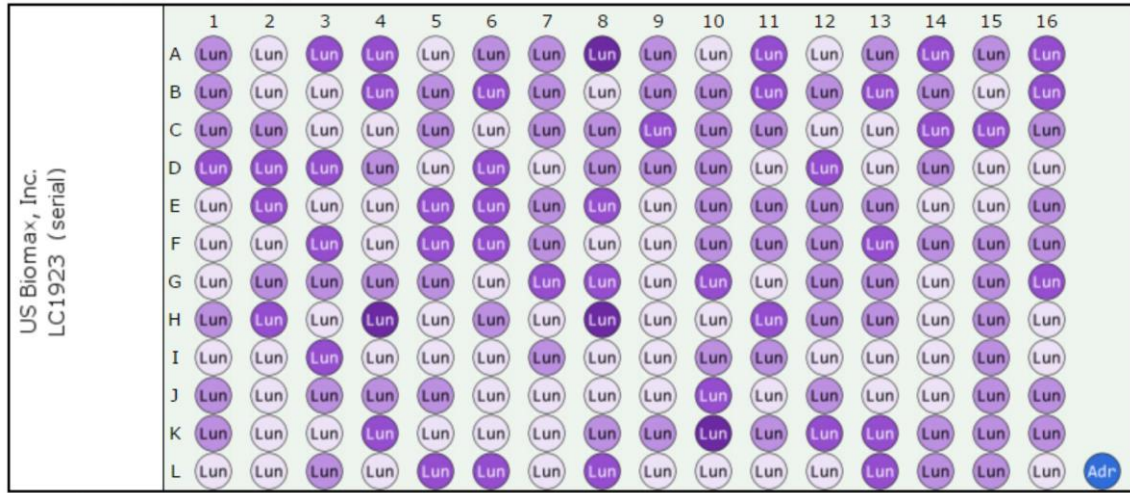

**Legend:** Lun - Lung  
 ● - Malignant tumor, ○ - Malignant tumor (stage I), ○ - Malignant tumor (stage IA), ○ - Malignant tumor (stage IB), ● - Malignant tumor (stage IIA), ● - Malignant tumor (stage IIB), ● - Malignant tumor (stage IIIA), ● - Malignant tumor (stage IIIB), ● - Malignant tumor (stage IV)

**Figure S47** TMA obtained from US Biomax that was stained with RK-10-Cy5 or SP263

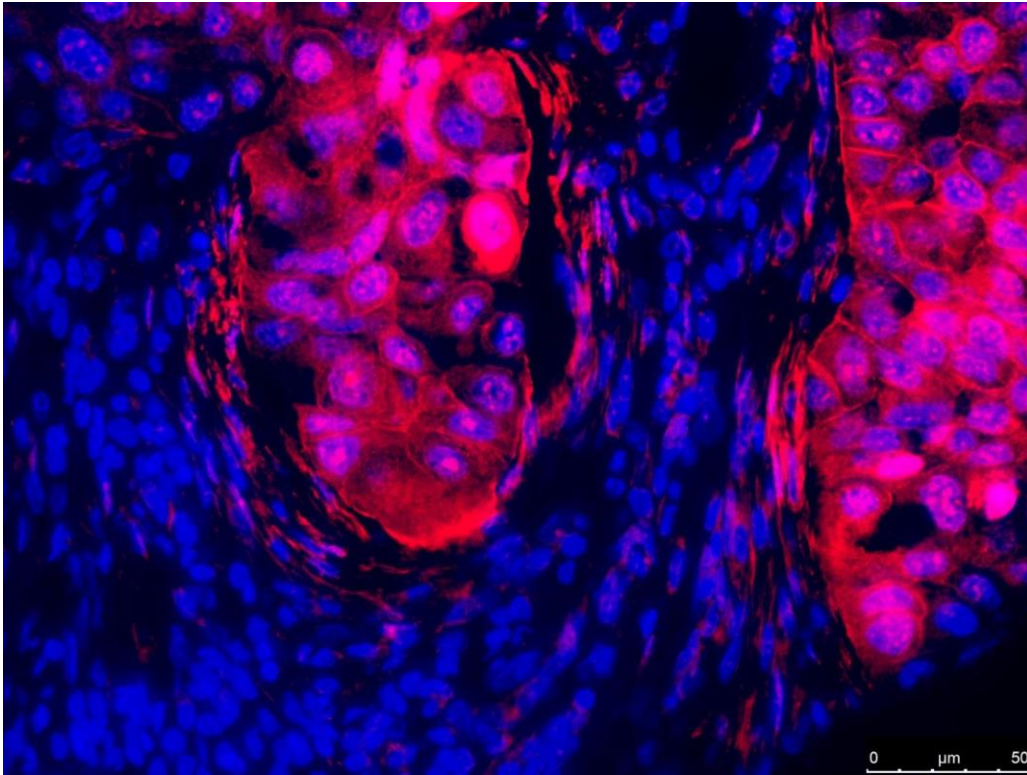

**Figure S48** 40X image of tumor area in TMA stained with RK-10-Cy5 shows specific staining of tumor for PD-L1 expression



## S49: Double Negative Spot

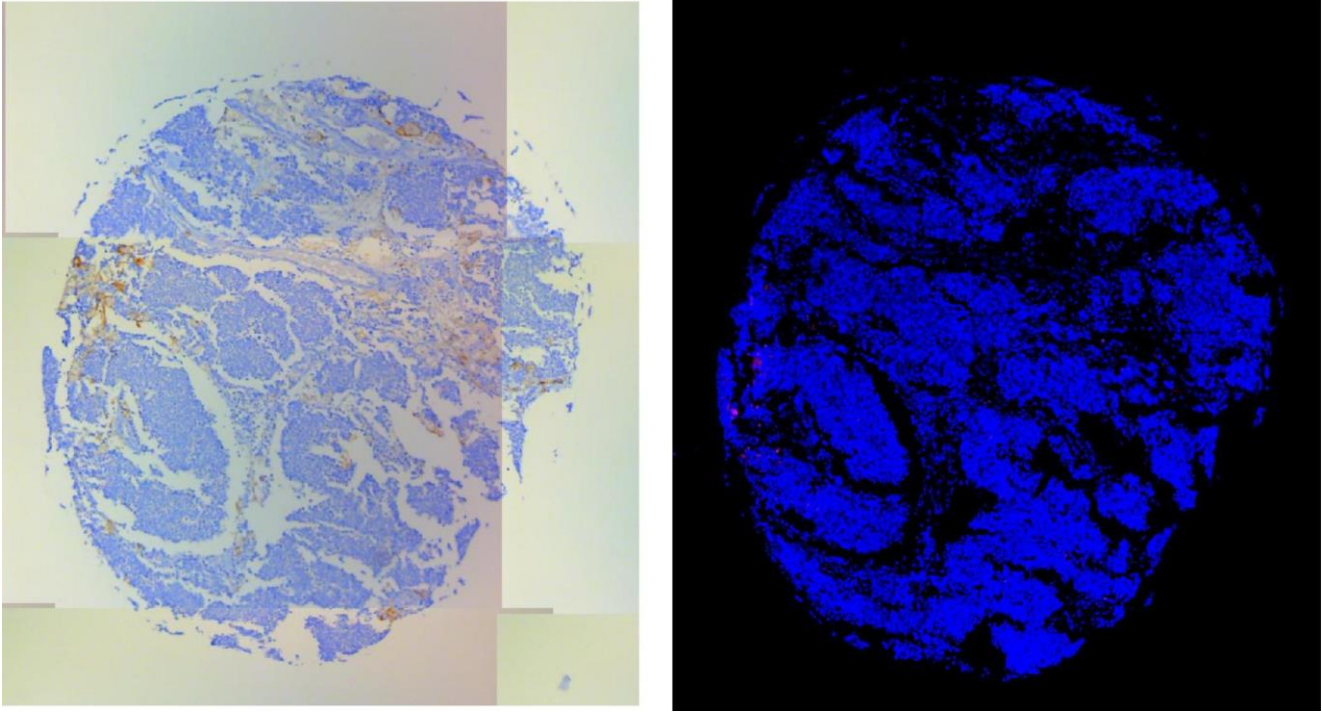

**Figure S49.** TMA Stained with SP263 (left) and RK-10-Cy5 (right) shows negative signal from both methods

## S50: Double Positive Spot

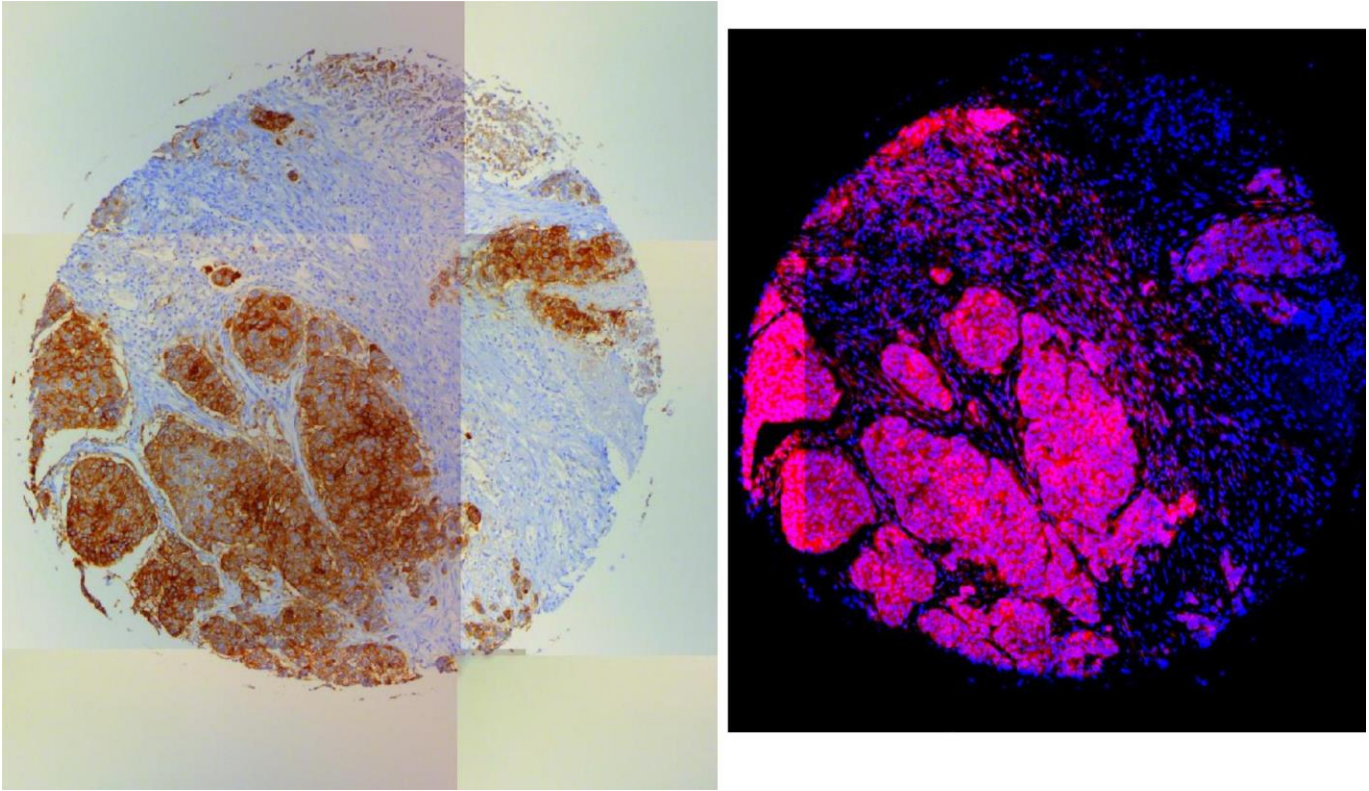

**Figure S50.** TMA Stained with SP263 (left) and RK-10-Cy5 (right) shows positive signal from both methods

## S51: Peptide Positive, SP263 Negative

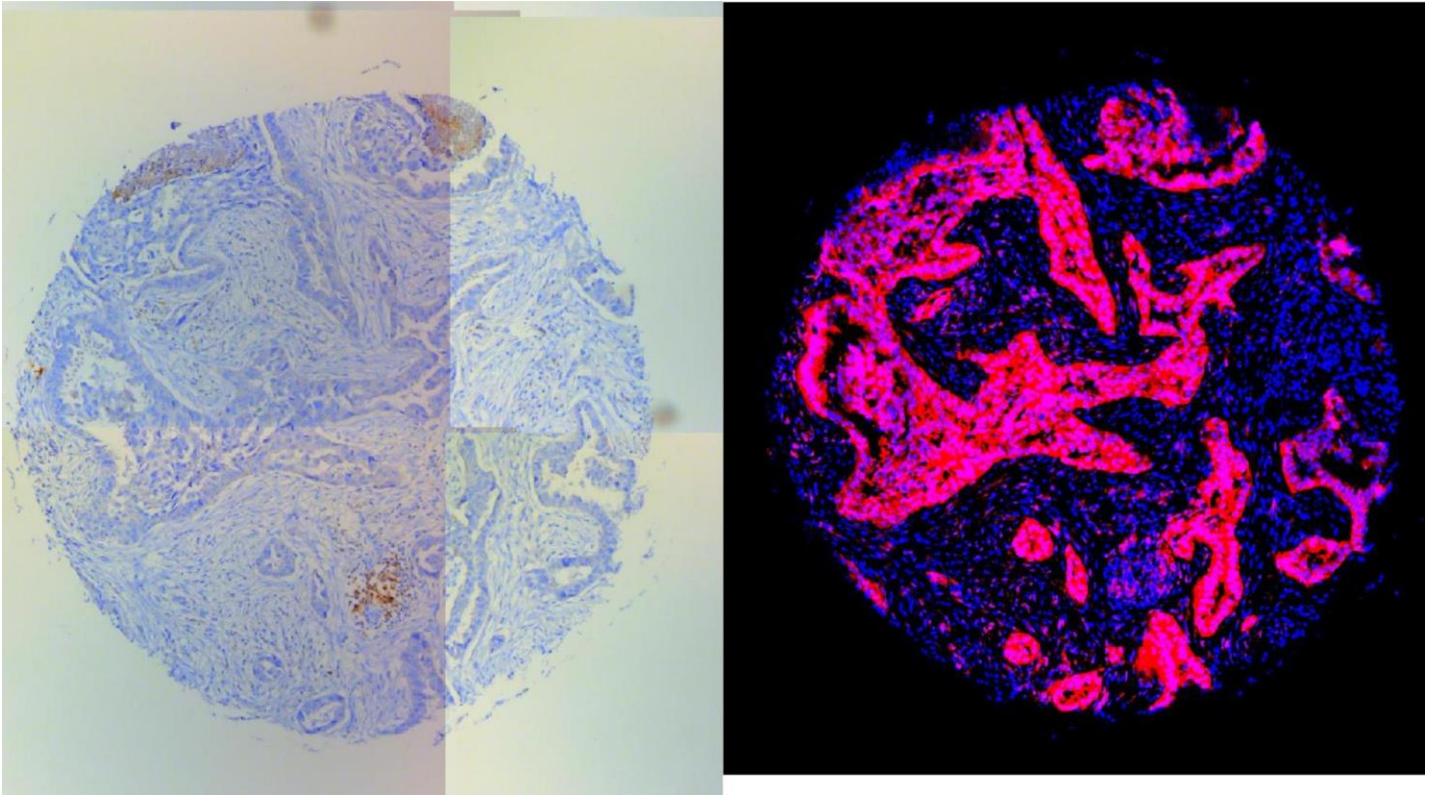

**Figure S51.** TMA Stained with SP263 (left) and RK-10-Cy5 (right) shows negative signal from SP263 and positive stain using the RK-10-Cy5 peptide.



## S52: Double Positive Spot

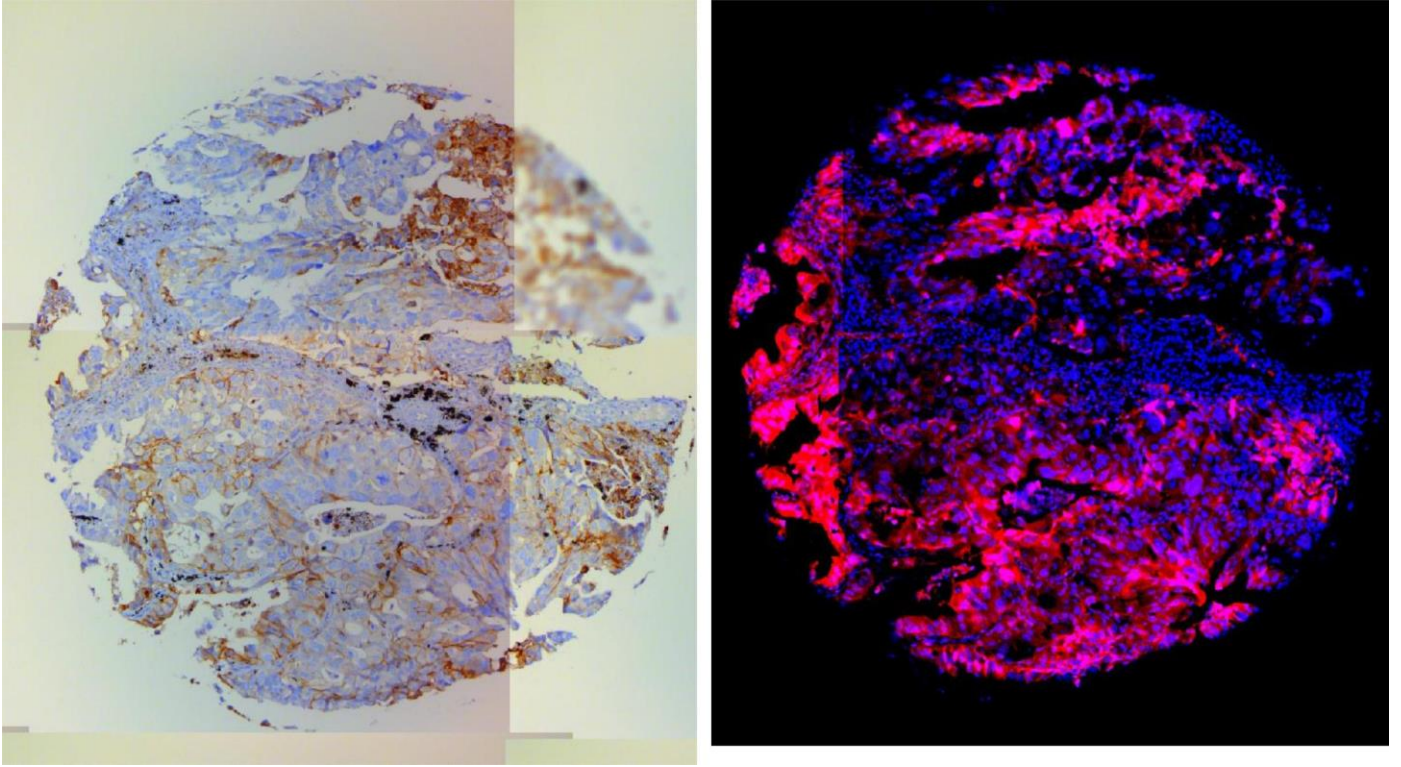

**Figure S52.** TMA Stained with SP263 (left) and RK-10-Cy5 (right) shows positive signal from both methods

## S53: Double Positive Spot

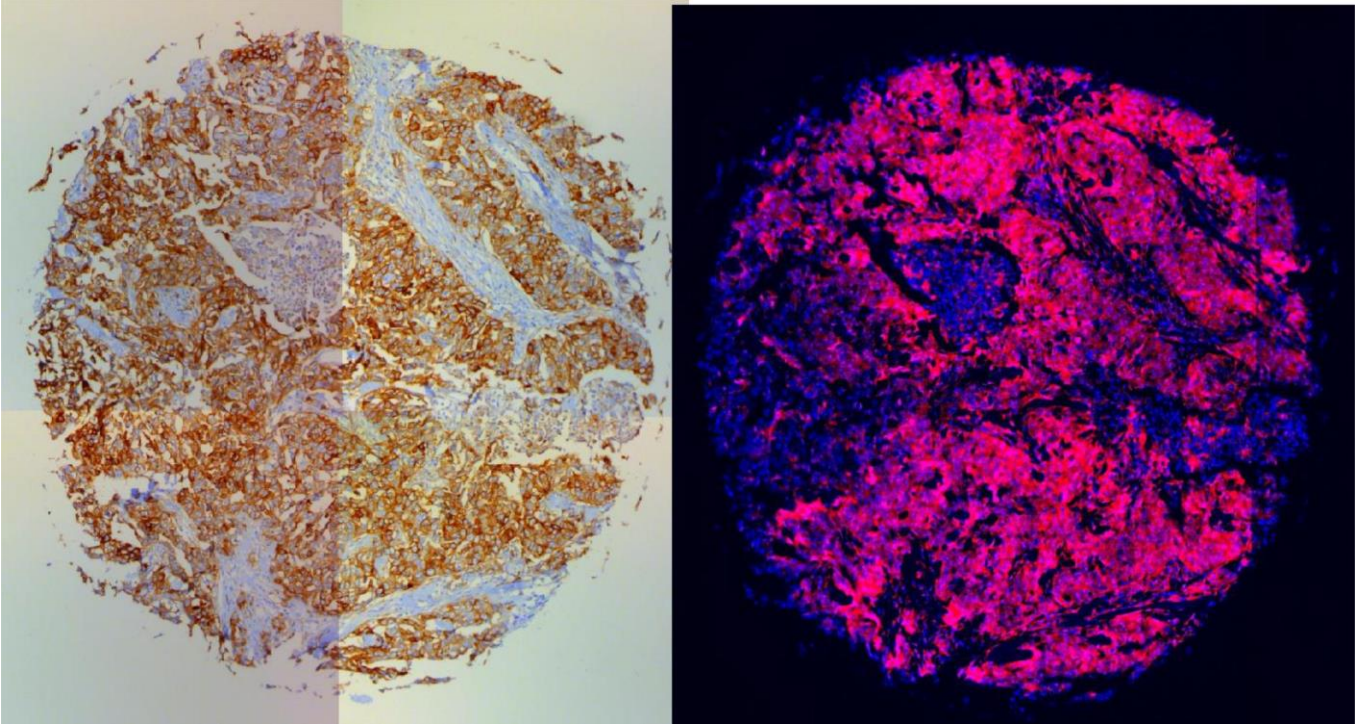

**Figure S53.** TMA Stained with SP263 (left) and RK-10-Cy5 (right) shows positive signal from both methods



## S54: Double Positive Spot

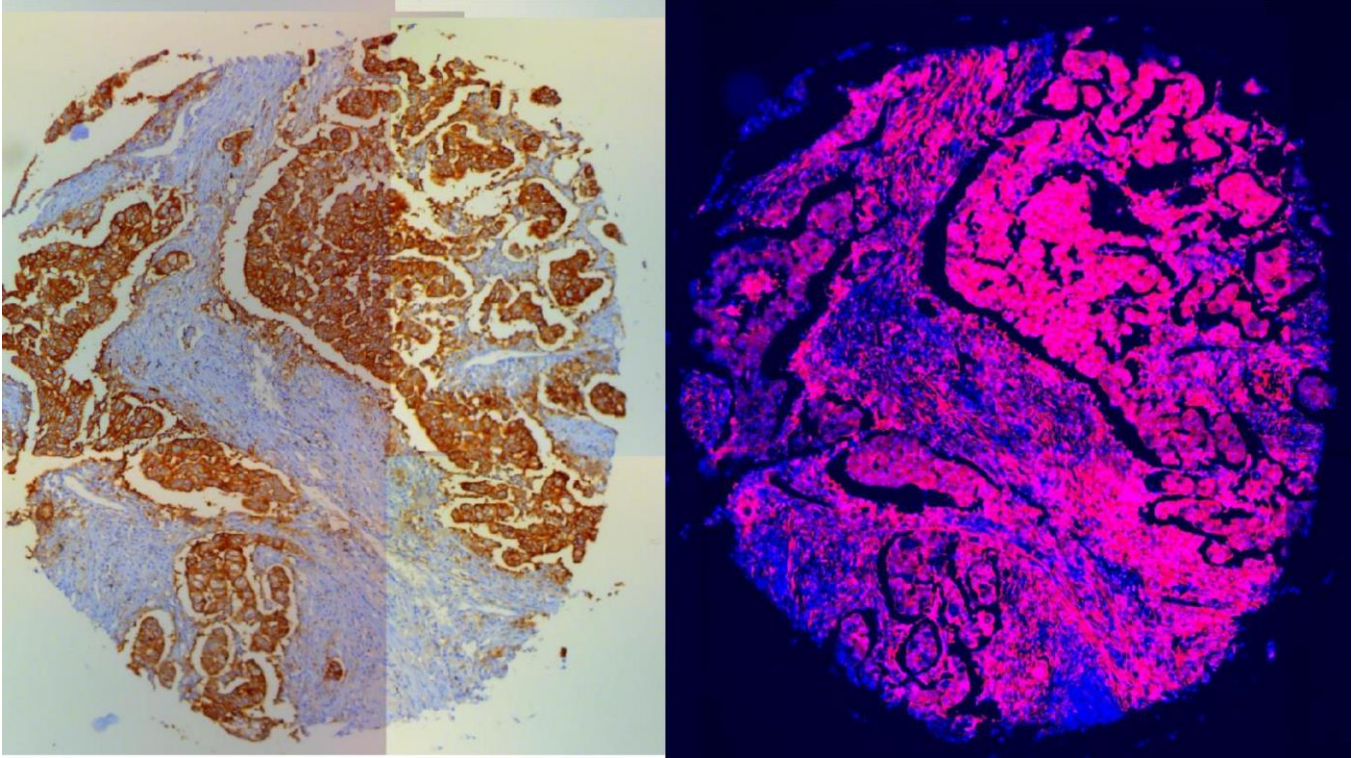

**Figure S54.** TMA Stained with SP263 (left) and RK-10-Cy5 (right) shows positive signal from both methods

## S55: Peptide Positive, SP263 Negative

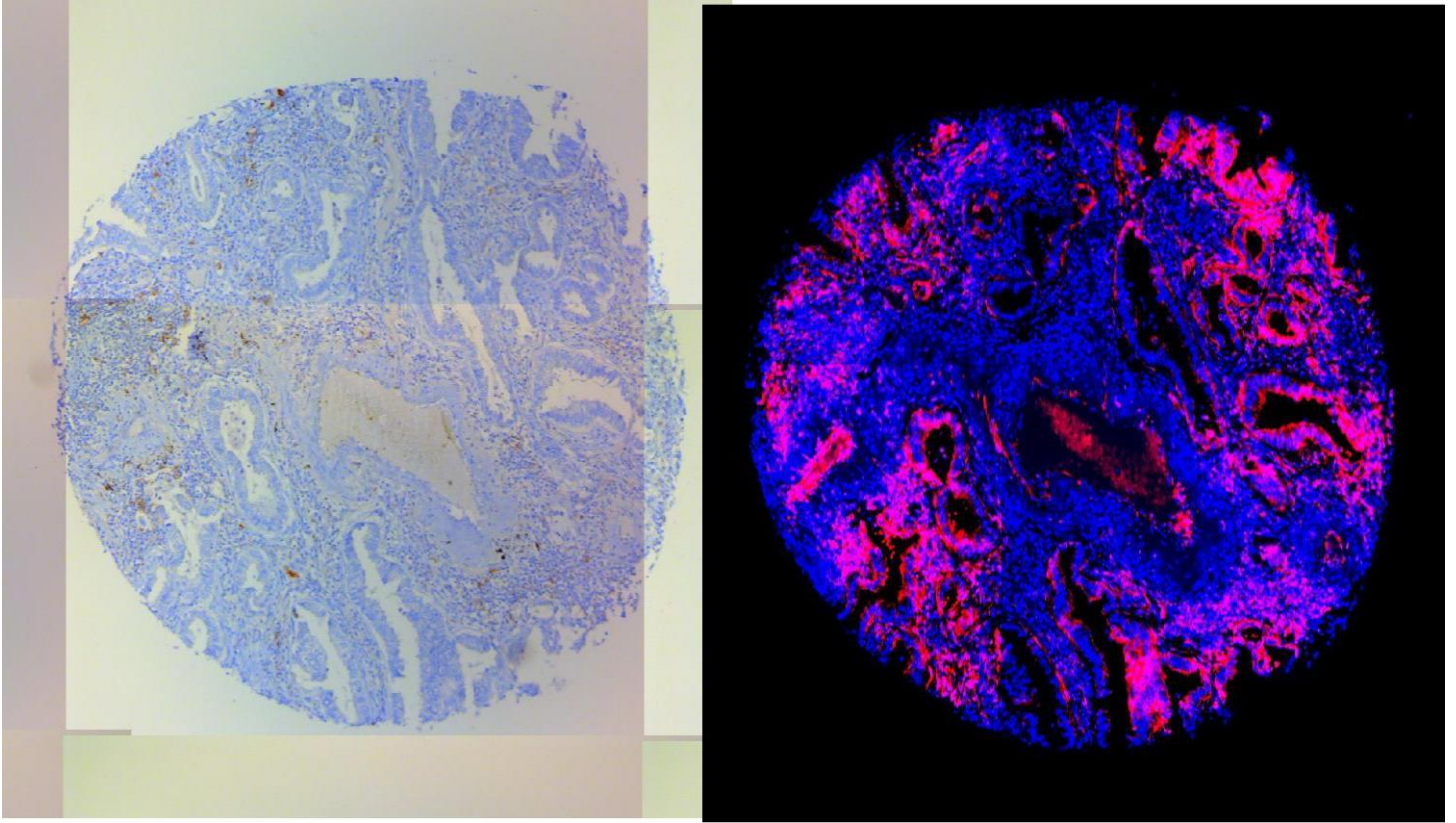

**Figure S55.** TMA Stained with SP263 (left) and RK-10-Cy5 (right) shows negative signal from SP263 and positive stain using the RK-10-Cy5 peptide.



## S56: Peptide Positive, SP263 Negative

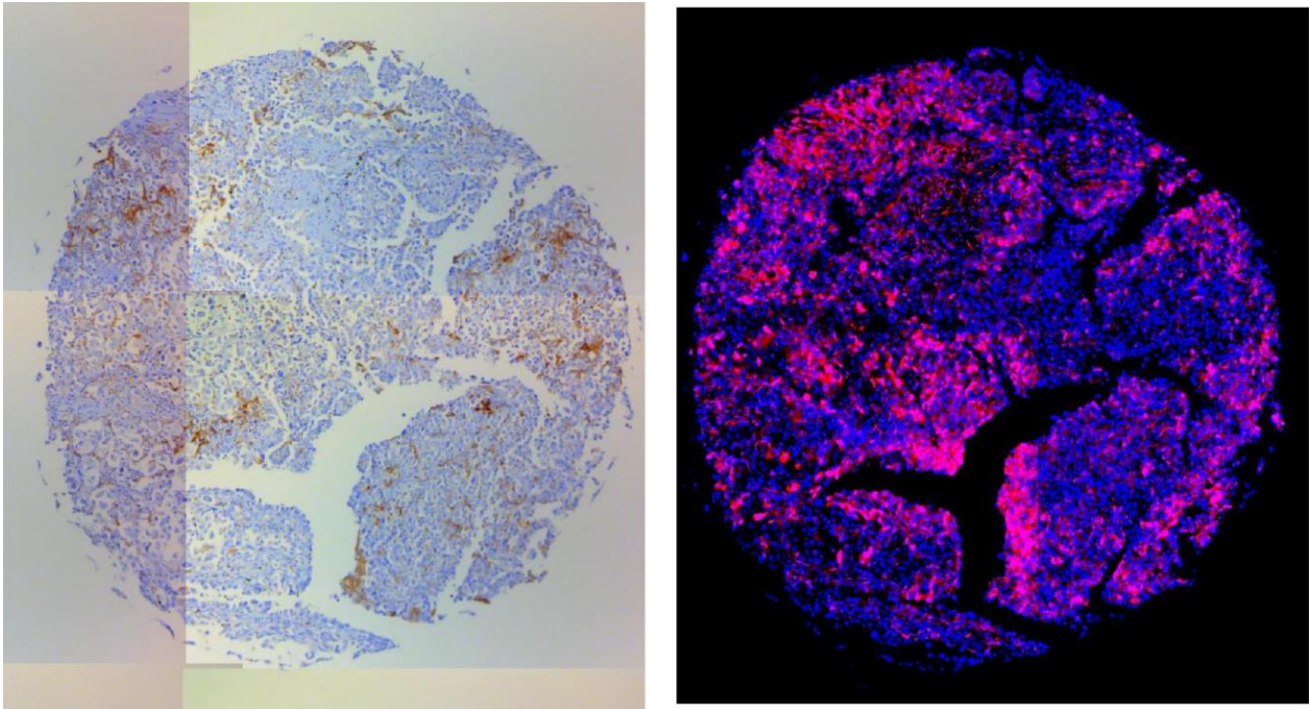

**Figure S56.** TMA Stained with SP263 (left) and RK-10-Cy5 (right) shows negative signal from SP263 and positive stain using the RK-10-Cy5 peptide.

## S57: Peptide Positive, SP263 Negative

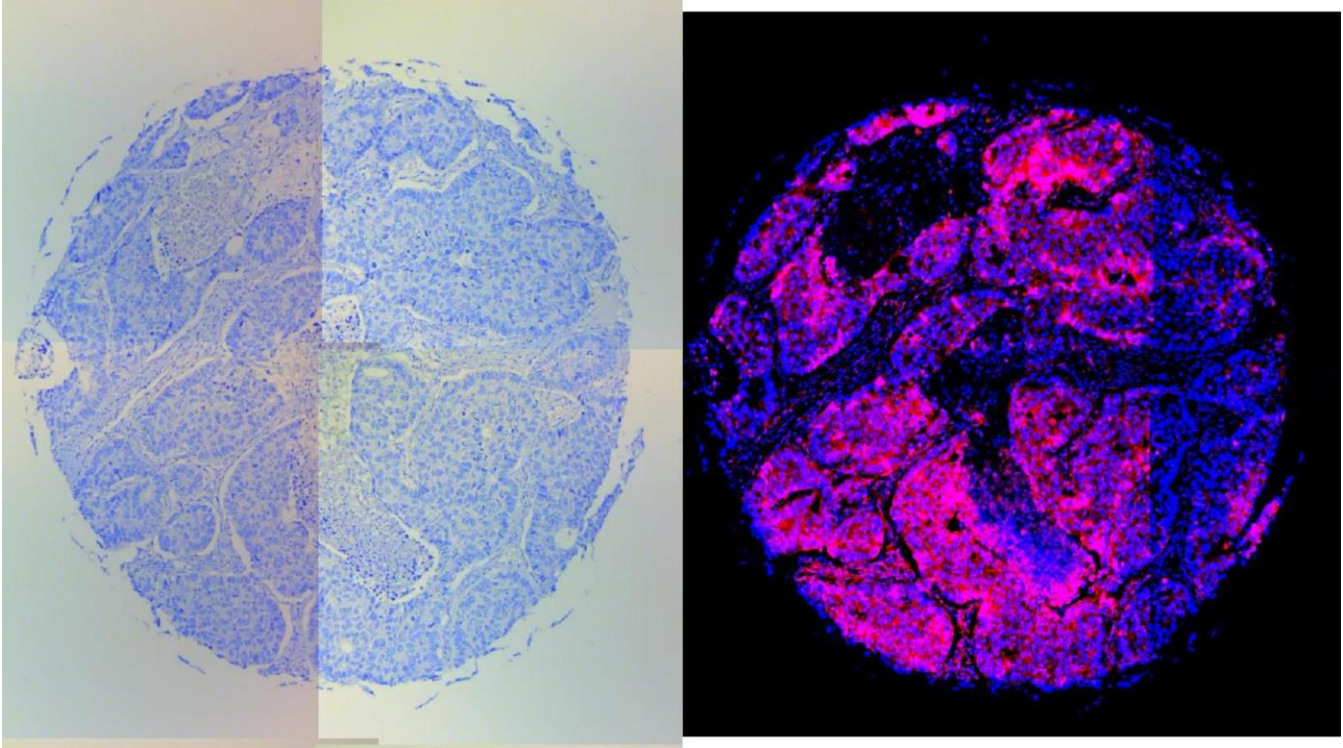

**Figure S57.** TMA Stained with SP263 (left) and RK-10-Cy5 (right) shows negative signal from SP263 and positive stain using the RK-10-Cy5 peptide.



## S58: Peptide Positive, SP263 Negative

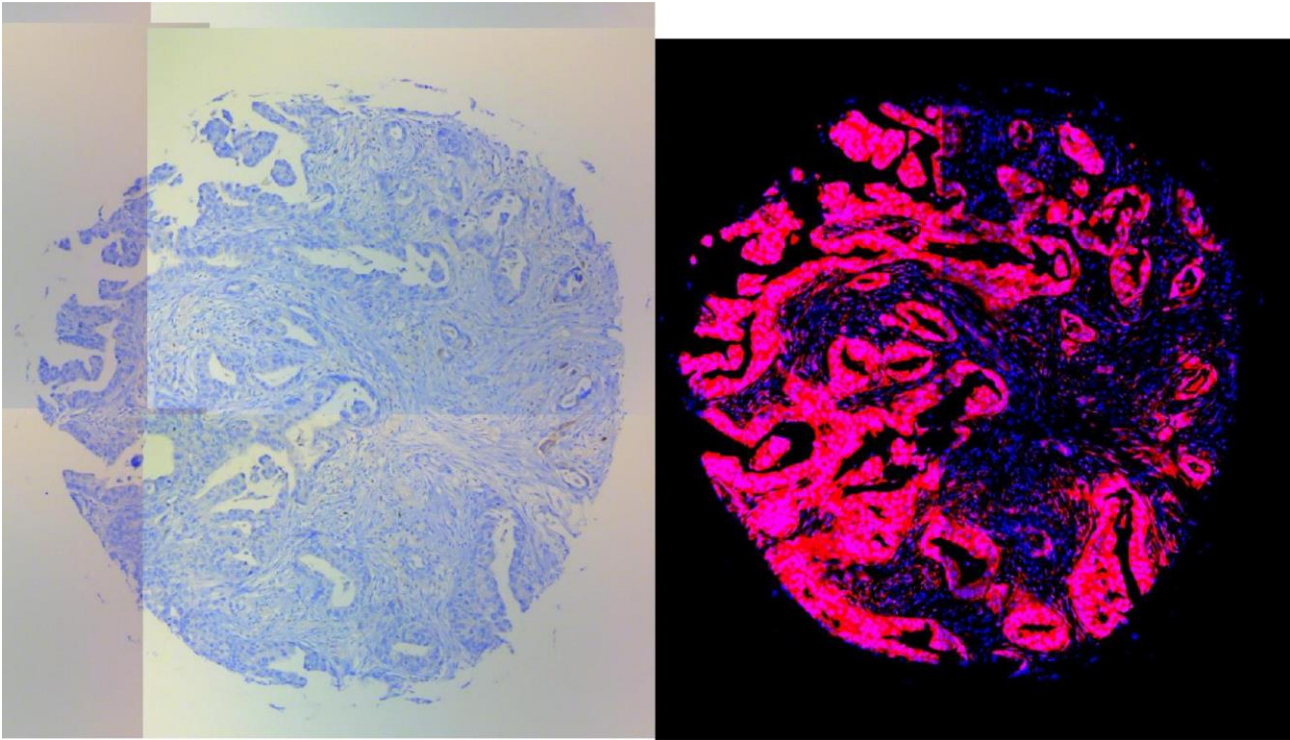

**Figure S58.** TMA Stained with SP263 (left) and RK-10-Cy5 (right) shows negative signal from SP263 and positive stain using the RK-10-Cy5 peptide.

## S59: Peptide Positive, SP263 Negative

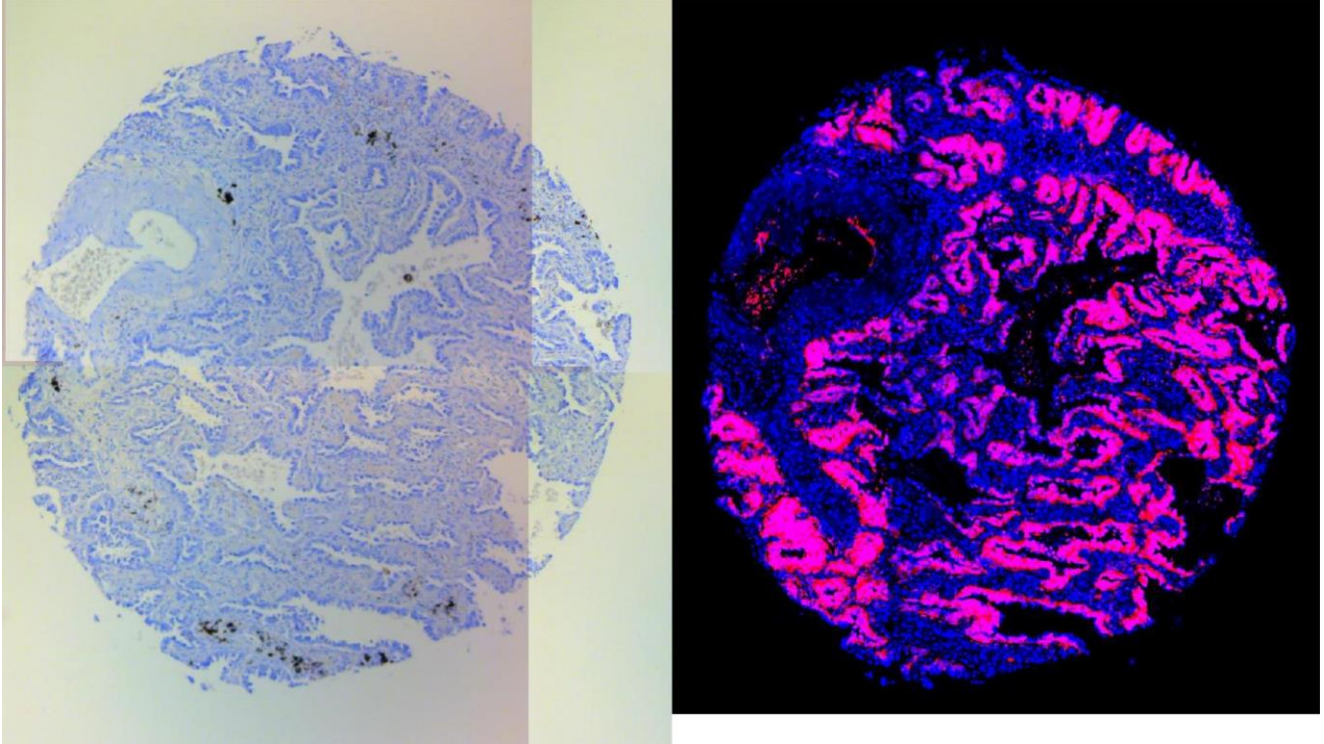

**Figure S59.** TMA Stained with SP263 (left) and RK-10-Cy5 (right) shows negative signal from SP263 and positive stain using the RK-10-Cy5 peptide.



## S60: Peptide Positive, SP263 Negative

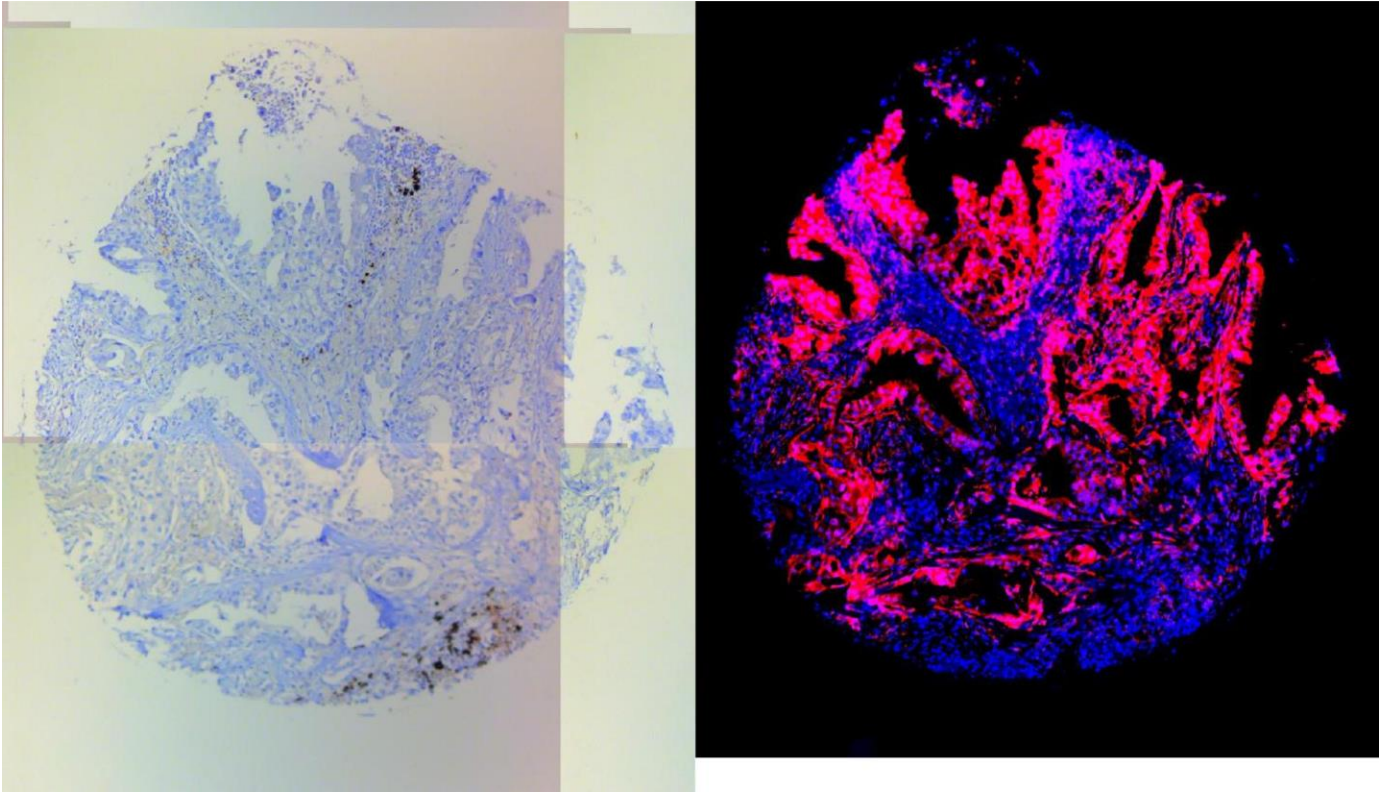

**Figure S60.** TMA Stained with SP263 (left) and RK-10-Cy5 (right) shows negative signal from SP263 and positive stain using the RK-10-Cy5 peptide.

## S61: Peptide Positive, SP263 Negative

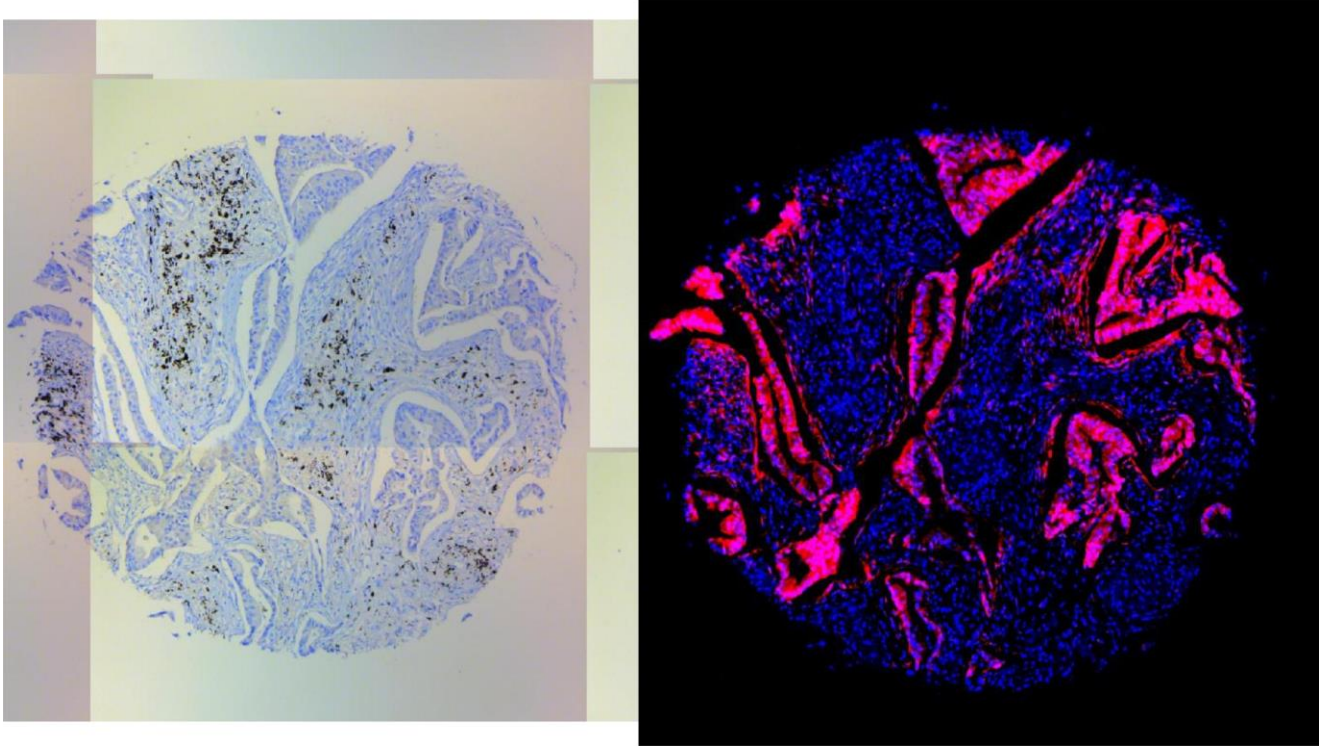

**Figure S61.** TMA Stained with SP263 (left) and RK-10-Cy5 (right) shows negative signal from SP263 and positive stain using the RK-10-Cy5 peptide.

## S62: Peptide Positive, SP263 Negative

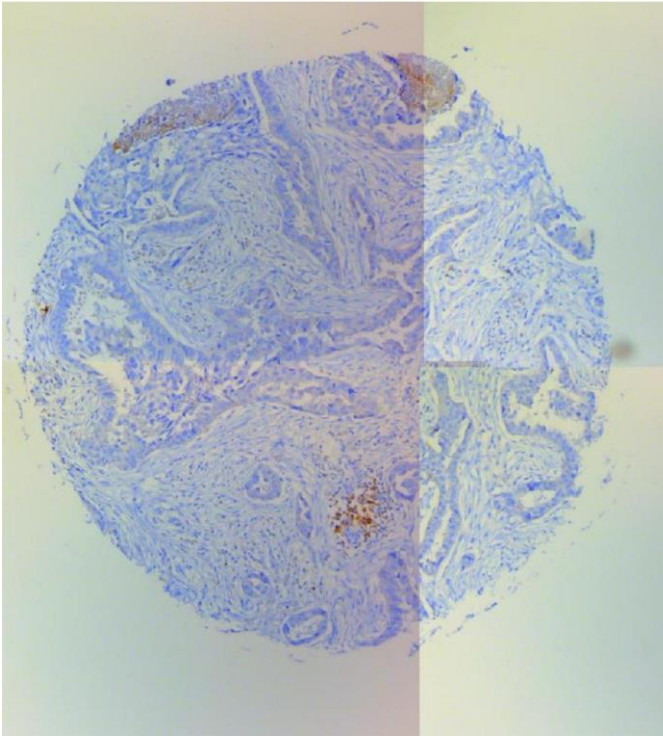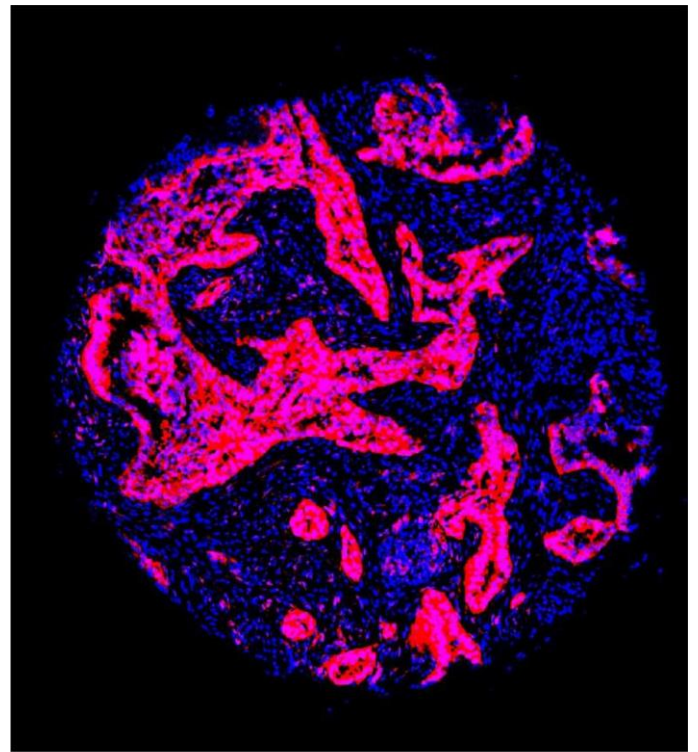

**Figure S62.** TMA Stained with SP263 (left) and RK-10-Cy5 (right) shows negative signal from SP263 and positive stain using the RK-10-Cy5 peptide.



## S63: Peptide Positive, SP263 Negative

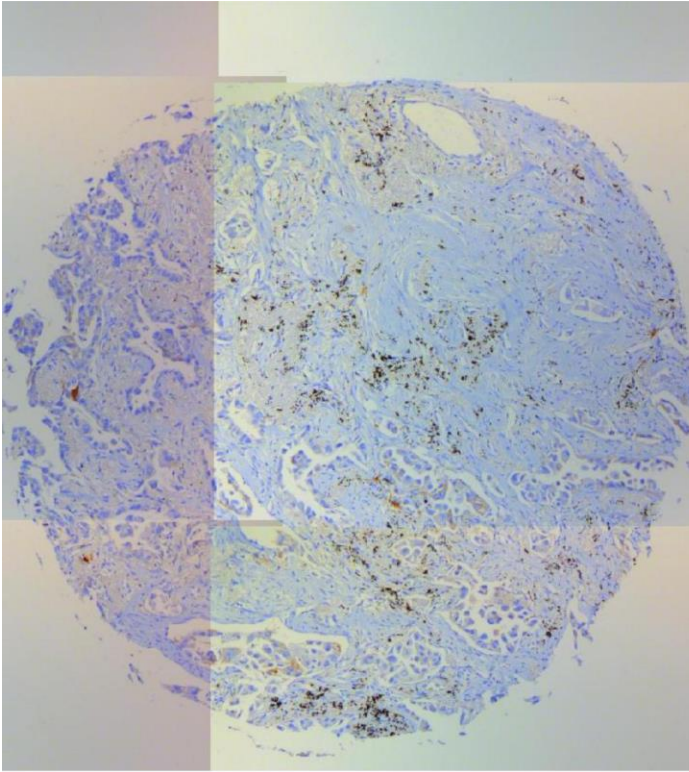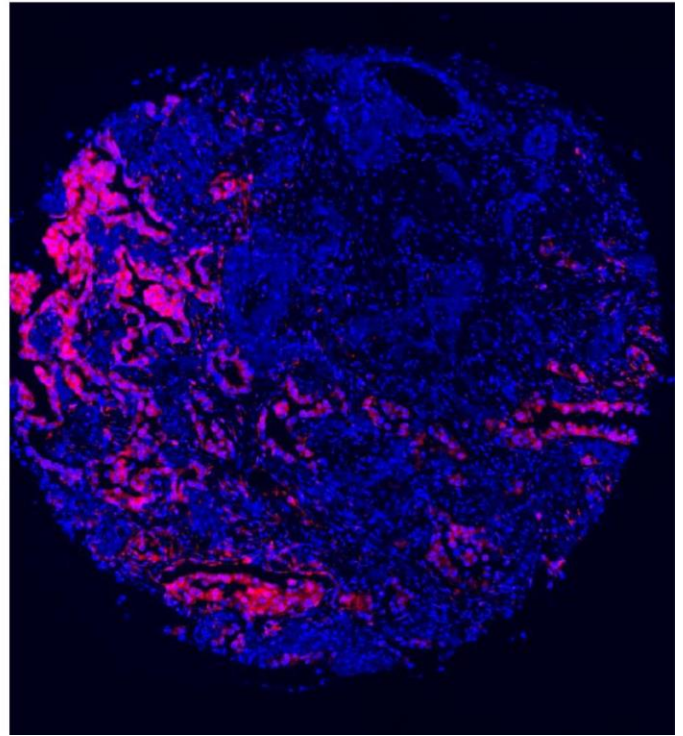

**Figure S63.** TMA Stained with SP263 (left) and RK-10-Cy5 (right) shows negative signal from SP263 and positive stain using the RK-10-Cy5 peptide.

## S64: Peptide Positive, SP263 Negative

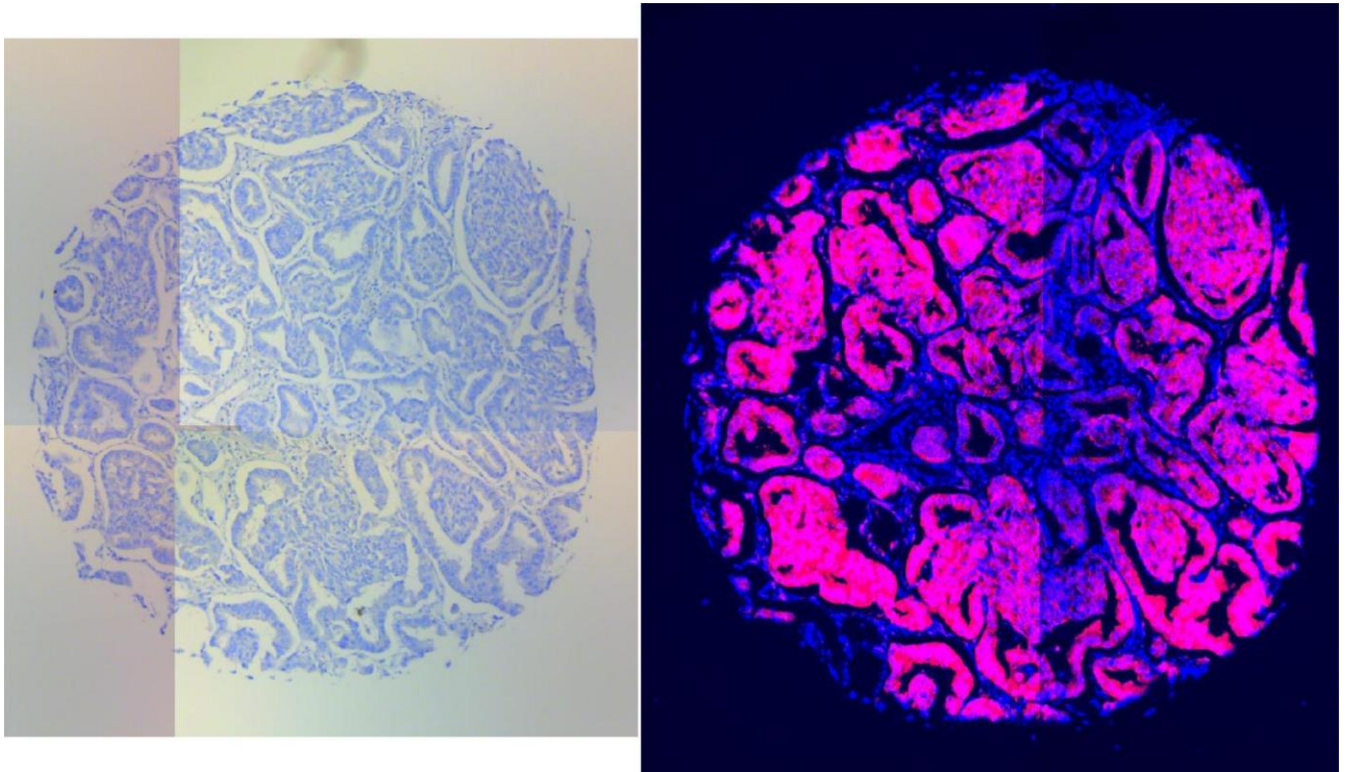

**Figure S64.** TMA Stained with SP263 (left) and RK-10-Cy5 (right) shows negative signal from SP263 and positive stain using the RK-10-Cy5 peptide.

## S65: Peptide Positive, SP263 Negative

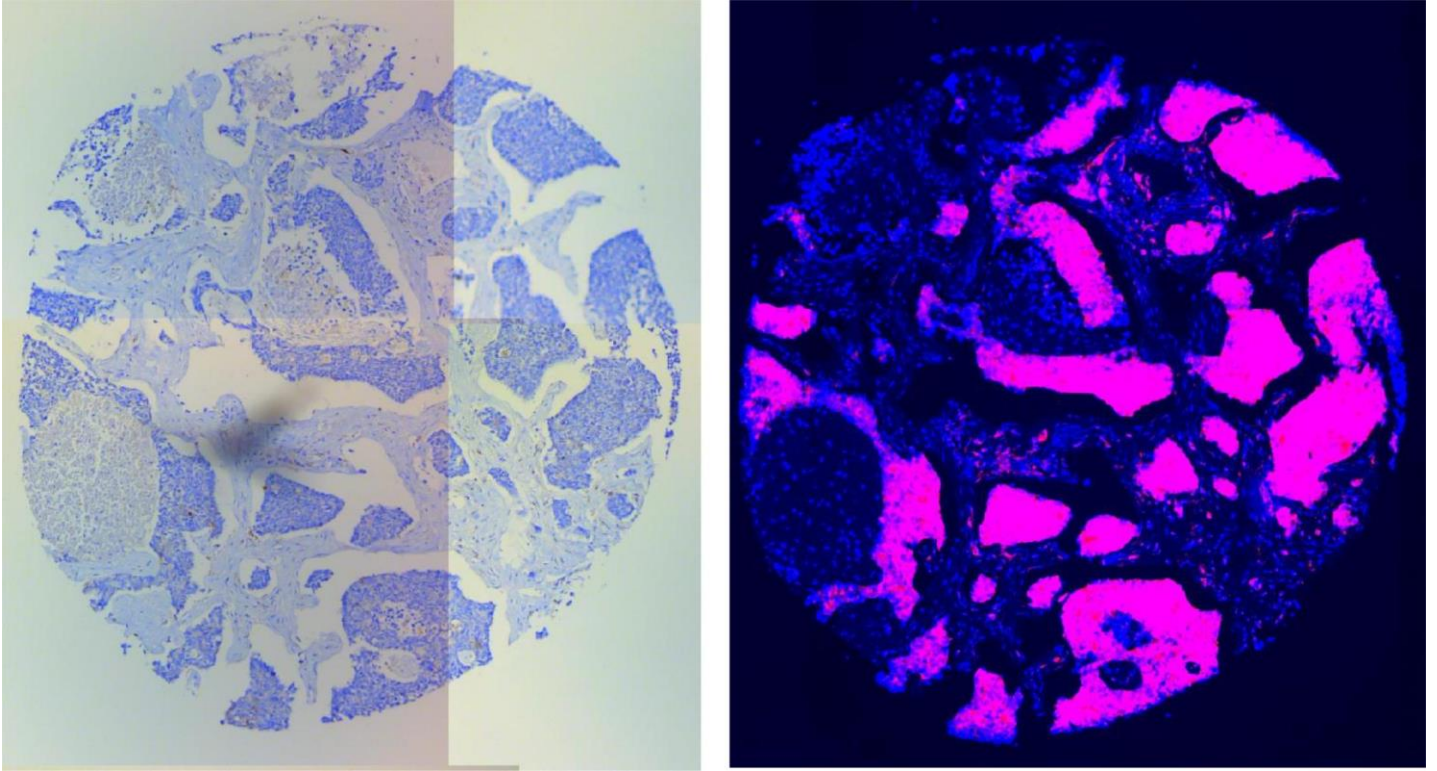

**Figure S65.** TMA Stained with SP263 (left) and RK-10-Cy5 (right) shows negative signal from SP263 and positive stain using the RK-10-Cy5 peptide.
